# Supplementary material for: Classification of genomic components and prediction of genes of Begomovirus based on subsequence natural vector and support vector machine
Source: PeerJ. 2020 Aug 3;8:e9625. doi: 10.7717/peerj.9625 (PMC7409808; doi:10.7717/peerj.9625)
Supplement: Supplemental Information 1 [file peerj-08-9625-s001.xlsx]

## Sheet: Sheet1
begomovirus	'NC_002048.1 Potato yellow mosaic Panama virus segment A, complete sequence'
begomovirus	'NC_021719.1 Sweet potato leaf curl Henan virus isolate China:Henan10:2012, complete genome'
begomovirus	'NC_008559.1 Malvastrum yellow mosaic virus DNA-A, complete genome'
begomovirus	'NC_012041.1 Bhendi yellow vein Bhubhaneswar virus DNA-A, complete genome'
begomovirus	'NC_024687.1 Rose leaf curl virus isolate AS24, complete genome'
begomovirus	'NC_003857.1 Dicliptera yellow mottle virus DNA B, complete sequence'
begomovirus	'NC_010293.1 Rhynchosia golden mosaic virus DNA B, complete sequence'
begomovirus	'NC_031961.1 Common bean severe mosaic virus isolate Cuba/Mayabeque 16/2014 segment DNA-A, complete sequence'
begomovirus	'NC_020255.1 Sida yellow mosaic Alagoas virus isolate BR:Vsa3:10 segment DNA-A, complete sequence'
begomovirus	'NC_006384.1 Ageratum leaf curl virus - [G52], complete genome'
begomovirus	'NC_005855.1 Tomato leaf curl Sudan virus - [Gezira], complete genome'
begomovirus	'NC_029648.1 Cotton leaf curl Shadadpur virus, complete genome, isolate Sha'
begomovirus	'NC_033554.1 Pea leaf distortion virus clone N36-41 segment DNA-A, complete sequence'
begomovirus	'NC_015631.1 Verbesina encelioides leaf curl alphasatellite, complete genome'
begomovirus	'NC_002049.1 Potato yellow mosaic Panama virus segment B, complete sequence'
begomovirus	'NC_010235.1 Pepper leaf curl virus satellite DNA beta, complete genome'
begomovirus	'NC_002556.1 Tomato rugose mosaic virus DNA B, complete sequence'
begomovirus	'NC_001932.1 Indian cassava mosaic virus DNA A, complete sequence'
begomovirus	'NC_039001.1 Desmodium mottle virus isolate UG5 segment DNA-A, complete sequence'
begomovirus	'NC_011348.1 Tomato yellow leaf distortion virus DNA A, complete genome'
begomovirus	'NC_038678.1 Okra leaf curl Oman betasatellite isolate OKB-1, complete sequence'
begomovirus	'NC_001936.1 Squash leaf curl virus A component DNA, complete sequence'
begomovirus	'NC_016660.1 Eclipta yellow vein virus clone EcYVV-[PK,Fai,06], complete genome'
begomovirus	'NC_014542.1 Tomato leaf curl Oman virus, complete genome'
begomovirus	'NC_024304.1 Solanum mosaic Bolivia virus segment DNA-A, complete sequence'
begomovirus	'NC_035888.1 Tobacco leaf curl Cuba virus isolate CU/frijol 8/2014 segment DNA-B, complete sequence'
begomovirus	'NC_038994.1 Synedrella yellow vein clearing virus isolate NCBS-PS-1 segment DNA-A, complete sequence'
begomovirus	'NC_023312.1 Tomato leaf curl Liwa virus isolate LW1, complete genome'
begomovirus	'NC_014745.1 Okra leaf curl Cameroon virus, complete genome'
begomovirus	'NC_038925.1 Tomato leaf curl Laos betasatellite C1 gene, clone l171-1'
begomovirus	'NC_023023.1 Spinach yellow vein Sikar virus clone AS22, complete genome'
begomovirus	'NC_043531.1 Datura leaf curl virus isolate Sudan-Datura 435-2016, complete genome'
begomovirus	'NC_003828.1 Tomato yellow leaf curl Sardinia virus, complete genome'
begomovirus	'NC_010313.1 Tomato leaf curl Ghana virus segment A, complete genome'
begomovirus	'NC_031765.1 Passionfruit leaf distortion virus isolate Colombia-Valle-2014 segment B, complete sequence'
begomovirus	'NC_010648.1 Macroptilium yellow mosaic virus DNA B, complete sequence'
begomovirus	'NC_024116.1 Tomato leaf curl Barka virus isolate Tom-55, complete genome'
begomovirus	'NC_015961.1 Tomato chlorotic leaf distortion virus-[Venezuela:Zulia:2004] DNA_B, complete genome'
begomovirus	'NC_001931.1 Bean dwarf mosaic virus DNA A, complete genome'
begomovirus	'NC_003405.1 Bhendi yellow vein mosaic virus-associated DNA beta, complete genome'
begomovirus	'NC_010818.1 Mesta yellow vein mosaic Bahraich virus-[India:Bahraich:2007] DNA A, complete sequence'
begomovirus	'NC_021205.1 Tomato leaf curl China virus - OX2, complete genome'
begomovirus	'NC_004635.2 Sida golden yellow vein virus-[Jamaica:Liguanea2:2008] DNA-A, complete genome'
begomovirus	'NC_009612.1 Tomato severe rugose virus DNA B, complete sequence'
begomovirus	'NC_004609.1 Mungbean yellow mosaic India virus DNA B, complete sequence'
begomovirus	'NC_013019.1 Sunn hemp leaf distortion virus DNA-A, complete genome'
begomovirus	'NC_010307.1 Emilia yellow vein virus-[Fz1], complete genome'
begomovirus	'NC_038454.1 Premna leaf curl virus isolate VN7 segment DNA-A, complete sequence'
begomovirus	'NC_001928.2 Abutilon mosaic virus subgenome DNA A'
begomovirus	'NC_009450.1 Tobacco leaf curl Japan betasatellite DNA, complete genome'
begomovirus	'NC_002817.1 Tobacco leaf curl Zimbabwe virus, complete genome'
begomovirus	'NC_014896.1 Okra enation leaf curl betasatellite [India:Sonipat:EL10:2006], complete genome'
begomovirus	'NC_003418.1 Bhendi yellow vein mosaic virus, complete genome'
begomovirus	'NC_010618.1 Pepper leaf curl Yunnan virus-[YN323], complete sequence'
begomovirus	'NC_009607.1 Tomato severe rugose virus DNA A, complete sequence'
begomovirus	'NC_013415.1 Velvet bean severe mosaic virus DNA B, complete genome'
begomovirus	'NC_030749.1 Malvastrum yellow vein Honghe virus segment DNA-A, complete sequence, isolate Y249'
begomovirus	'NC_004661.1 Sida yellow vein virus DNA A, complete sequence'
begomovirus	'NC_015317.1 Sweet potato leaf curl South Carolina virus, complete genome'
begomovirus	'NC_038473.1 Tomato leaf curl Uganda virus - [Iganga] segment A, complete sequence'
begomovirus	'NC_038970.1 VEM begomovirus 4 isolate GtSq8 segment DNA-A, complete sequence'
begomovirus	'NC_032119.1 Vernonia crinkle betasatellite isolate UG7, complete sequence'
begomovirus	'NC_004655.1 East African cassava mosaic Zanzibar virus DNA-A, complete genome'
begomovirus	'NC_038799.1 Malvastrum yellow mosaic Jamaica virus isolate Ma9bB6 segment DNA-B, complete sequence'
begomovirus	'NC_014894.1 Okra enation leaf curl virus [India:Munthal EL37:2006] DNA-A, complete genome'
begomovirus	'NC_001983.1 Mungbean yellow mosaic virus DNA A, complete sequence'
begomovirus	'NC_001939.1 Tomato mottle virus DNA B, complete sequence'
begomovirus	'NC_015962.1 Tomato chlorotic leaf distortion virus-[Venezuela:Zulia:2004] segment DNA_A, complete sequence'
begomovirus	'NC_004733.1 Malvastrum yellow vein virus satellite DNA beta, complete genome'
begomovirus	'NC_008284.1 Pepper yellow leaf curl Indonesia virus DNA-B, complete genome'
begomovirus	'NC_038976.1 Euphorbia yellow leaf curl virus isolate PK1A, complete genome'
begomovirus	'NC_038459.1 Sida golden mosaic Lara virus strain Venezuela:Lara:M1:2009 segment DNA-A, complete sequence'
begomovirus	'NC_022008.1 Capraria yellow spot Yucatan virus segment DNA-B, complete sequence'
begomovirus	'NC_003556.1 Eupatorium yellow vein virus, complete genome'
begomovirus	'NC_004147.1 Papaya leaf curl virus, complete genome'
begomovirus	'NC_016580.1 Tomato dwarf leaf virus DNA-A, complete genome'
begomovirus	'NC_007219.1 Cotton leaf curl Bangalore virus-associated DNA beta, complete genome'
begomovirus	'NC_027040.1 Ageratum yellow vein virus strain Guam 12-02 segment A, complete sequence'
begomovirus	'NC_017005.1 Cassava mosaic Madagascar virus DNA B, complete genome'
begomovirus	'NC_004660.1 Sida golden mosaic Honduras virus DNA B, complete sequence'
begomovirus	'NC_019036.1 Blechum interveinal chlorosis virus DNA B, complete genome'
begomovirus	'NC_033555.1 Ageratum yellow vein alphasatellite clone N36-24, complete sequence'
begomovirus	'NC_004043.1 Bean golden mosaic virus DNA B, complete sequence'
begomovirus	'NC_004674.1 East African cassava mosaic virus DNA A, complete sequence'
begomovirus	'NC_038452.1 Malvastrum yellow mosaic Helshire virus isolate Ma179A5 segment DNA-A, complete sequence'
begomovirus	'NC_010239.1 Radish leaf curl virus satellite DNA beta, complete genome'
begomovirus	'NC_038793.1 Cabbage leaf curl Jamaica virus clone 1966 Cu3-B6 segment DNA-B, complete sequence'
begomovirus	'NC_038881.1 Euphorbia leaf curl Guangxi virus complete genome, isolate G35-1'
begomovirus	'NC_010435.1 Kenaf leaf curl virus DNA A, complete sequence'
begomovirus	'NC_012493.1 Tomato leaf curl Patna betasatellite, complete genome'
begomovirus	'NC_017002.1 Macroptilium yellow net virus DNA B, complete genome'
begomovirus	'NC_008779.1 Sida yellow mosaic Yucatan virus DNA A, complete sequence'
begomovirus	'NC_028128.1 Malachra yellow vein mosaic betasatellite isolate OK113, complete sequence'
begomovirus	'NC_010441.2 Tomato leaf curl Cotabato virus DNA-A, complete genome'
begomovirus	'NC_024305.1 Solanum mosaic Bolivia virus segment DNA-B, complete sequence'
begomovirus	'NC_015048.1 Abutilon mosaic Bolivia virus DNA-B, complete genome'
begomovirus	'NC_003722.1 Tobacco curly shoot virus, complete genome'
begomovirus	'NC_017987.1 Sida yellow mosaic China virus - [Hainan 8] complete genome, isolate Hn7'
begomovirus	'NC_003505.1 Bean calico mosaic virus DNA B, complete sequence'
begomovirus	'NC_022003.1 Bean chlorotic mosaic virus isolate Venezuela:Rubio 932:2007 segment DNA-B, complete sequence'
begomovirus	'NC_014510.2 Tomato leaf deformation virus DNA-A, complete genome'
begomovirus	'NC_014140.1 Soybean mild mottle virus, complete genome'
begomovirus	'NC_022229.1 Tomato yellow leaf curl Saudi virus isolate Hail1, complete genome'
begomovirus	'NC_000882.1 Pepper leaf curl virus, complete genome'
begomovirus	'NC_010439.1 Tomato leaf curl Cebu virus DNA-A, complete genome'
begomovirus	'NC_002046.1 Sida golden mosaic virus coat protein (AV1), AC3 (AC3), transactivator protein (AC2), replication associated protein (AC1), and AC4 (AC4) genes, complete cds'
begomovirus	'NC_014903.1 Rhynchosia yellow mosaic India virus DNA-B, complete genome'
begomovirus	'NC_005636.1 Horsegram yellow mosaic virus DNA B, complete genome'
begomovirus	'NC_004641.1 Tobacco leaf curl Kochi virus, complete genome'
begomovirus	'NC_024777.1 Small begomovirus-associated satellite isolate Sa19-S1, complete sequence'
begomovirus	'NC_038461.1 Sida yellow leaf curl virus isolate BR:Coi3:07 segment DNA-A, complete sequence'
begomovirus	'NC_038899.1 Tomato leaf curl Namakely virus, isolate Madagascar:Namakely:2001'
begomovirus	'NC_028985.1 Okra leaf curl Oman virus, complete genome, isolate OK-2'
begomovirus	'NC_004042.1 Bean golden mosaic virus DNA A, complete sequence'
begomovirus	'NC_011584.1 East African cassava mosaic Kenya virus DNA B, complete genome'
begomovirus	'NC_003708.1 Watermelon chlorotic stunt virus DNA A, complete sequence'
begomovirus	'NC_021245.1 Malvastrum leaf curl Philippines virus isolate Mc1 segment DNA-A, complete sequence'
begomovirus	'NC_001933.1 Indian cassava mosaic virus DNA B, complete sequence'
begomovirus	'NC_010647.1 Macroptilium yellow mosaic virus DNA A, complete sequence'
begomovirus	'NC_038451.1 Ludwigia yellow vein Vietnam virus segment DNA-A, complete sequence'
begomovirus	'NC_009605.1 Tomato leaf curl Sinaloa virus DNA B, complete sequence'
begomovirus	'NC_008058.1 Tomato golden mottle virus DNA A, complete sequence'
begomovirus	'NC_014139.1 Abutilon Brazil virus DNA B segment, complete sequence'
begomovirus	'NC_004153.1 Tomato leaf curl Vietnam virus DNA A, complete genome'
begomovirus	'NC_038677.1 Eupatorium yellow vein mosaic betasatellite DNA, complete genome, isolate: Suya-2003'
begomovirus	'NC_030748.1 Senna leaf curl virus isolate Mohali, complete genome'
begomovirus	'NC_011919.1 Bhendi yellow vein Delhi virus [2004:New Delhi] DNA-A, complete genome'
begomovirus	'NC_039003.1 Malachra yellow mosaic virus DNA, segment DNA-A, complete sequence, isolate: Barasat'
begomovirus	'NC_001930.1 Bean dwarf mosaic virus DNA B, complete genome'
begomovirus	'NC_005954.1 Okra leaf curl alphasatellite rep gene for replication associated protein, clone NOB-3'
begomovirus	'NC_028114.1 Tomato leaf curl Comoros virus complete genome, isolate Mayote:Dembeni:2003'
begomovirus	'NC_038806.1 Tomato golden vein virus isolate DF[BR:Pip1799:03] segment DNA-B, complete sequence'
begomovirus	'NC_038791.1 Bean golden yellow mosaic virus-[Dominican Republic] coat protein (AR1), AL3 protein (AL3), and AL2 protein (AL2) genes, complete cds'
begomovirus	'NC_018456.1 Soybean chlorotic spot virus DNA-B, complete sequence'
begomovirus	'NC_009550.1 Lindernia anagallis yellow vein virus DNA-A, complete sequence'
begomovirus	'NC_005497.1 Tomato leaf curl Java virus-[Ageratum] satellite DNA, complete genome'
begomovirus	'NC_038969.1 VEM begomovirus 3 isolate GtSq10 segment DNA-A, complete sequence'
begomovirus	'NC_004662.1 Sida yellow vein virus DNA B, complete sequence'
begomovirus	'NC_010836.1 Tomato common mosaic virus DNA-B, complete genome'
begomovirus	'NC_004825.1 Loofa yellow mosaic virus DNA B, complete sequence'
begomovirus	'NC_010834.1 Tomato mild mosaic virus DNA-B, complete genome'
begomovirus	'NC_020256.1 Sida mottle Alagoas virus isolate BR:Vsa2:10 segment DNA-A, complete sequence'
begomovirus	'NC_011096.1 Tomato leaf curl Kumasi virus segment A, complete sequence'
begomovirus	'NC_009646.1 Corchorus golden mosaic virus DNA-B, complete sequence'
begomovirus	'NC_004614.1 Tomato leaf curl Bangladesh virus, complete genome'
begomovirus	'NC_017001.1 Macroptilium yellow net virus DNA A, complete genome'
begomovirus	'NC_014746.1 Ageratum leaf curl Buea betasatellite, complete genome'
begomovirus	'NC_003866.1 Cabbage leaf curl virus coat protein (AV1), replicase associated protein (AC3), transactivator protein (AC2), replicase associated protein (AC1) and AC4 genes, complete cds'
begomovirus	'NC_016578.1 Cleome leaf crumple virus DNA-A, complete genome'
begomovirus	'NC_004582.1 Cotton leaf curl Alabad virus, complete genome'
begomovirus	'NC_004608.1 Mungbean yellow mosaic India virus DNA A, complete sequence'
begomovirus	'NC_020475.1 Corchorus yellow vein mosaic betasatellite clone CBA7, complete sequence'
begomovirus	'NC_008492.1 Corchorus yellow spot virus DNA A, complete sequence'
begomovirus	'NC_020473.1 Corchorus yellow vein mosaic virus isolate CEA8, complete genome'
begomovirus	'NC_004569.1 Tomato yellow leaf curl Malaga virus, complete genome'
begomovirus	'NC_038469.1 Tomato interveinal chlorosis virus isolate PE[BR:Mdc2681:04] segment DNA-A, complete sequence'
begomovirus	'NC_003831.1 Chino del tomate virus DNA B, complete sequence'
begomovirus	'NC_020254.1 Sida yellow blotch virus isolate BR:Rla1:10 segment DNA-A, complete sequence'
begomovirus	'NC_008374.1 Tomato yellow leaf curl Guangdong virus DNA A, complete sequence'
begomovirus	'NC_003867.1 Tomato mosaic Havana virus-[Quivican] DNA, segment A'
begomovirus	'NC_004098.1 Macroptilium mosaic Puerto Rico virus DNA B, complete sequence'
begomovirus	'NC_012137.1 Cotton leaf curl Burewala virus - [India:Vehari:2004], complete genome'
begomovirus	'NC_022073.1 Hemidesmus yellow mosaic virus clone H1 segment DNA-A, complete sequence'
begomovirus	'NC_026761.1 Tomato enation leaf curl virus isolate TC14 segment DNA-A, complete sequence'
begomovirus	'NC_038975.1 Whitefly associated Puerto Rico alphasatellite 1 isolate PR3-6, complete sequence'
begomovirus	'NC_008236.1 Siegesbeckia yellow vein virus-[GD13], complete genome'
begomovirus	'NC_014597.1 Tobacco leaf curl PUSA alphasatellite, complete genome'
begomovirus	'NC_027129.1 Hollyhock yellow vein mosaic Islamabad virus complete genome, isolate 3AK'
begomovirus	'NC_010952.1 Macroptilium golden mosaic virus-[Jamaica:Wissadula:August Town] DNA A, complete sequence'
begomovirus	'NC_008373.1 Tomato leaf curl Guangdong virus DNA-A, complete sequence'
begomovirus	'NC_010713.1 Clerodendrum golden mosaic virus DNA-A, complete sequence'
begomovirus	'NC_016574.1 Abutilon mosaic Brazil virus DNA-A, complete genome'
begomovirus	'NC_004645.1 Squash mild leaf curl virus-[Imperial Valley] DNA A, complete sequence'
begomovirus	'NC_008579.1 Croton yellow vein mosaic virus-associated DNA beta betaC1 gene'
begomovirus	'NC_038448.1 Hedyotis uncinella yellow mosaic virus isolate VN1 segment DNA-A, complete sequence'
begomovirus	'NC_008517.1 Tomato leaf curl Pune virus, complete genome'
begomovirus	'NC_010619.1 Pepper leaf curl Yunnan virus satellite DNA beta, complete genome'
begomovirus	'NC_035487.1 Macroptilium golden yellow mosaic virus isolate DR:M45:16 segment DNA A, complete sequence'
begomovirus	'NC_038472.1 Tomato leaf curl Rajasthan virus - [India:Rajasthan:2005] segment A, complete sequence'
begomovirus	'NC_038886.1 Rhynchosia yellow mosaic virus, segment DNA-B, complete genome'
begomovirus	'NC_004642.1 Tomato severe leaf curl virus, complete genome'
begomovirus	'NC_003856.1 Dicliptera yellow mottle virus DNA A, complete sequence'
begomovirus	'NC_038466.1 Sweet potato mosaic virus - [Brazil:Brasilia1:2007] isolate BR:BSB1, complete genome'
begomovirus	'NC_030311.1 Cotton yellow mosaic virus isolate Benin-Gossypium raimondii-55-14 segment DNA-B, complete sequence'
begomovirus	'NC_005347.1 Pepper yellow vein Mali virus, complete genome'
begomovirus	'NC_034250.1 Tomato leaf curl Pakistan betasatellite complete sequence, clone HZ4'
begomovirus	'NC_011135.1 Tomato leaf curl Kerala virus, complete genome'
begomovirus	'NC_006957.1 Begomovirus-associated DNA-III, complete genome'
begomovirus	'NC_003199.1 Cotton leaf curl Multan virus segment A, complete sequence'
begomovirus	'NC_010949.1 Tomato yellow vein streak virus DNA-A, complete genome'
begomovirus	'NC_022232.1 Sweet potato leaf curl Shanghai virus isolate China:Jilin1:2012, complete genome'
begomovirus	'NC_012481.1 Rhynchosia golden mosaic Yucatan virus DNA A, complete genome'
begomovirus	'NC_038683.1 Tobacco leaf curl Patna betasatellite isolate Pusa-Bihar, complete sequence'
begomovirus	'NC_043433.1 Sweet potato golden vein Korea virus isolate 102_SPGVaV, complete genome'
begomovirus	'NC_038798.1 Malvastrum yellow mosaic Jamaica virus isolate Ma179A73 segment DNA-A, complete sequence'
begomovirus	'NC_011805.1 Gossypium punctatum mild leaf curl virus DNA A, complete genome'
begomovirus	'NC_028140.1 Melochia mosaic virus DNA A, complete sequence'
begomovirus	'NC_038467.1 Tomato bright yellow mosaic virus isolate BA167 segment DNA-A, complete sequence'
begomovirus	'NC_004071.1 Hollyhock leaf crumple virus, complete genome'
begomovirus	'NC_010946.1 Pumpkin yellow mosaic Malaysia virus DNA A, complete sequence'
begomovirus	'NC_010791.1 Ramie mosaic virus DNA A, complete sequence'
begomovirus	'NC_026253.1 Oxalis yellow vein virus strain USA:LA:01 segment DNA-A, complete sequence'
begomovirus	'NC_018718.1 Dalechampia chlorotic mosaic virus isolate Venezuela:Albarico 1020:2007 segment DNA-B, complete sequence'
begomovirus	'NC_014446.1 Sida golden mosaic Florida virus-Malvastrum DNA-A, complete genome'
begomovirus	'NC_016984.1 Pepper leaf curl Lahore Virus-[Pakistan:Lahore1:2004] segment A, complete genome'
begomovirus	'NC_004654.1 Tobacco leaf curl Japan virus, complete genome'
begomovirus	'NC_004628.1 Chilli leaf curl virus, complete genome'
begomovirus	'NC_009553.1 Tobacco leaf curl Thailand virus, complete genome'
begomovirus	'NC_038985.1 Velvet bean golden mosaic virus isolate bgv6-5, complete genome'
begomovirus	'NC_038465.1 Sweet potato leaf curl Sichuan virus 1 isolate China:Sichuan15:2012, complete genome'
begomovirus	'NC_004732.1 Melon chlorotic leaf curl virus-[Guatemala] component A, complete sequence'
begomovirus	'NC_038894.1 Tomato leaf curl Anjouan virus, isolate Comoros:Ouani:2004'
begomovirus	'NC_019946.1 Tomato yellow mottle virus segment DNA-A, complete sequence'
begomovirus	'NC_013414.1 Velvet bean severe mosaic virus DNA A, complete genome'
begomovirus	'NC_002047.1 Sida golden mosaic virus nuclear transport protein (BV1) and movement/pathogenicity protein (BC1) genes, complete cds'
begomovirus	'NC_003891.1 Tomato leaf curl Bangalore virus, complete genome'
begomovirus	'NC_010951.1 Wissadula golden mosaic St Thomas Virus DNA B, complete sequence'
begomovirus	'NC_010294.1 Rhynchosia golden mosaic virus DNA A, complete sequence'
begomovirus	'NC_031459.1 Malvastrum bright yellow mosaic virus isolate Ma8S clone Ma8S-5B segment DNA-B, complete sequence'
begomovirus	'NC_009547.1 Sida yellow vein Vietnam virus DNA-A, complete sequence'
begomovirus	'NC_040189.1 Common bean mottle virus isolate CU/Mayabeque 6/2014 segment DNA-B, complete sequence'
begomovirus	'NC_013465.1 Sweet potato leaf curl Canary virus, complete genome'
begomovirus	'NC_038901.1 Tomato leaf curl Toliara virus cp, v2, rep, c2, c3 and c4 genes, isolated in Miandrivazo, Madagascar'
begomovirus	'NC_014473.1 Croton yellow vein virus, complete genome'
begomovirus	'NC_014596.1 Tobacco leaf curl Pusa virus DNA-A, complete genome'
begomovirus	'NC_022586.1 Sweet potato leaf curl Sichuan virus 2 isolate China:Sichuan14:2012, complete genome'
begomovirus	'NC_015491.1 Merremia mosaic Puerto Rico virus DNA B, complete genome'
begomovirus	'NC_038456.1 Sida ciliaris golden mosaic virus strain Venezuela:Lara:M3:2009 segment DNA-A, complete sequence'
begomovirus	'NC_038796.1 Jacquemontia mosaic Yucatan virus segment DNA-A, complete sequence'
begomovirus	'NC_030310.1 Cotton yellow mosaic virus isolate Benin-Gossypium raimondii-55-14 segment DNA-A, complete sequence'
begomovirus	'NC_038983.1 Triumfetta yellow mosaic virus isolate BR-Msj1-10 segment DNA-A, complete sequence'
begomovirus	'NC_004904.1 Tomato begomovirus satellite DNA beta, complete genome'
begomovirus	'NC_003897.1 Tomato leaf curl Karnataka virus, complete genome'
begomovirus	'NC_001917.1 Tomato mottle Taino virus DNA B, complete sequence'
begomovirus	'NC_004651.1 Squash leaf curl Yunnan virus, complete genome'
begomovirus	'NC_016577.1 Abutilon mosaic Brazil virus DNA-B, complete genome'
begomovirus	'NC_011804.1 Gossypium darwinii symptomless virus DNA-A, complete genome'
begomovirus	'NC_038988.1 Common bean mottle virus isolate CU/Mayabeque 6/2014 segment DNA-A, complete sequence'
begomovirus	'NC_007965.1 Merremia mosaic virus DNA A, complete sequence'
begomovirus	'NC_015124.1 Tomato leaf curl Hanoi virus, complete genome'
begomovirus	'NC_035887.1 Tobacco leaf curl Cuba virus isolate CU/frijol 8/2014 segment DNA-A, complete sequence'
begomovirus	'NC_006876.1 Tomato leaf curl Mayotte virus, complete genome'
begomovirus	'NC_038234.1 Tomato rugose yellow leaf curl virus isolate U1 clone 3 segment DNA_B, complete sequence'
begomovirus	'NC_001984.1 Mungbean yellow mosaic virus DNA B, complete sequence'
begomovirus	'NC_003665.1 Tomato chlorotic mottle virus DNA B, complete sequence'
begomovirus	'NC_018935.1 Tobacco leaf chlorosis betasatellite isolate 03, complete sequence'
begomovirus	'NC_038460.1 Sida golden yellow vein virus-[A11], complete genome'
begomovirus	'NC_004044.1 Tomato yellow leaf curl China virus, complete genome'
begomovirus	'NC_038439.1 Boerhavia yellow spot virus isolate Yucatan segment DNA A, complete sequence'
begomovirus	'NC_029313.1 Bhindi yellow vein alphasatellite replication protein gene, complete cds'
begomovirus	'NC_020236.1 Pepper yellow leaf curl virus isolate YN65-1, complete genome'
begomovirus	'NC_038792.1 Cabbage leaf curl Jamaica virus clone 1910 Cu-A6 segment DNA-A, complete sequence'
begomovirus	'NC_006267.1 Sida yellow mosaic virus-[China]-associated DNA beta DNA beta, complete sequence'
begomovirus	'NC_008299.1 Pedilanthus leaf curl virus isolate Rahim Yar Khan 1 segment A, complete sequence'
begomovirus	'NC_009088.1 Mesta yellow vein mosaic virus DNA-A, complete sequence'
begomovirus	'NC_014845.1 Bhendi yellow vein India virus [India:Dharwad OYDWR2:2006] DNA-A, complete genome'
begomovirus	'NC_038476.1 Asystasia begomovirus 2 segment DNA-A, complete sequence'
begomovirus	'NC_038462.1 Sidastrum golden leaf spot virus isolate DF334 segment DNA-A, complete sequence'
begomovirus	'NC_004625.1 East African cassava mosaic Cameroon virus DNA A, complete sequence'
begomovirus	'NC_014968.1 Sweet potato leaf curl Uganda virus-[Uganda:Kampala:2008], complete genome'
begomovirus	'NC_014142.1 Soybean chlorotic blotch virus DNA B, complete genome'
begomovirus	'NC_008056.1 Sida mosaic Sinaloa virus DNA B, complete sequence'
begomovirus	'NC_022007.1 Capraria yellow spot Yucatan virus segment DNA-A, complete sequence'
begomovirus	'NC_018090.1 French bean leaf curl virus isolate FbLCV-Kanpur segment DNA-A, complete sequence'
begomovirus	'NC_043429.1 Ageratum yellow vein Sri Lanka betasatellite C1 gene, clone sl7-1'
begomovirus	'NC_006359.1 Corchorus yellow vein virus - [Hoa Binh] DNA B, complete genome'
begomovirus	'NC_028262.1 Andrographis yellow vein leaf curl virus isolate A-64, complete genome'
begomovirus	'NC_008493.1 Corchorus yellow spot virus DNA B, complete sequence'
begomovirus	'NC_005052.1 Honeysuckle yellow vein mosaic virus satellite DNA beta, complete genome'
begomovirus	'NC_040188.1 Triumfetta yellow mosaic virus isolate BR-Msj1-10 segment DNA-B, complete sequence'
begomovirus	'NC_031754.1 Okra enation leaf curl virus isolate Trincomalee segment DNA-A, complete sequence'
begomovirus	'NC_038438.1 Abutilon golden mosaic Yucatan virus isolate Conkal-2007 segment A, complete sequence'
begomovirus	'NC_038879.1 Eupatorium yellow vein virus-[SOJ3] complete genome, isolate Fukuoka-SOJ3'
begomovirus	'NC_008305.1 Euphorbia mosaic virus-Yucatan Peninsula DNA B, complete sequence'
begomovirus	'NC_040180.1 Allamanda leaf mottle distortion virus isolate Al-K1 segment DNA-B, complete sequence'
begomovirus	'NC_014141.1 Soybean chlorotic blotch virus DNA A, complete genome'
begomovirus	'NC_002985.1 Cucurbit leaf crumple virus DNA B, complete sequence'
begomovirus	'NC_012554.2 Euphorbia yellow mosaic virus DNA B, complete genome'
begomovirus	'NC_009545.1 Spilanthes yellow vein virus DNA-A, complete sequence'
begomovirus	'NC_004638.1 Potato yellow mosaic Trinidad virus DNA A, complete sequence'
begomovirus	'NC_004192.1 Pepper leaf curl Bangladesh virus segment A component, complete genome'
begomovirus	'NC_003803.1 South African cassava mosaic virus DNA A, complete sequence'
begomovirus	'NC_004657.1 Sida golden mosaic Costa Rica virus DNA A, complete sequence'
begomovirus	'NC_004626.1 Ageratum yellow vein virus, complete genome'
begomovirus	'NC_012206.1 Tomato leaf curl Nigeria virus-[Nigeria:2006], complete genome'
begomovirus	'NC_004673.1 Okra yellow vein mosaic virus, complete genome'
begomovirus	'NC_005331.1 Sida micrantha mosaic virus segment B, complete sequence'
begomovirus	'NC_013017.1 Okra leaf curl virus-[Cameroon], complete genome'
begomovirus	'NC_024894.1 Bitter gourd yellow vein virus isolate BD12C8 segment DNA-A, complete sequence'
begomovirus	'NC_003504.1 Bean calico mosaic virus DNA A coat protein (AV1), replication enhancer protein (AC3), transcription activator protein (AC2), replication initiator protein (AC1), and AC4 (AC4) genes, complete cds'
begomovirus	'NC_028143.1 Melochia yellow mosaic virus DNA B, complete sequence'
begomovirus	'NC_008283.1 Pepper yellow leaf curl Indonesia virus DNA-A, complete genome'
begomovirus	'NC_031455.1 Sida chlorotic vein virus isolate ALS15_2C segment DNA-A, complete sequence'
begomovirus	'NC_038893.1 Tobacco mottle leaf curl virus AV1 gene, AC1 gene, AC2 gene, AC3 gene and AC4 gene'
begomovirus	'NC_024013.1 Jatropha mosaic virus strain Jamaica:Spanish Town:2004 clone B1 segment DNA-B, complete sequence'
begomovirus	'NC_021341.1 Tomato yellow leaf curl Yunnan virus isolate YN2013 clone 10 segment DNA-A, complete sequence'
begomovirus	'NC_008059.1 Sida mosaic Sinaloa virus DNA A, complete sequence'
begomovirus	'NC_038924.1 Mirabilis leaf curl betasatellite complete sequence, isolate Himachal'
begomovirus	'NC_004630.1 East African cassava mosaic Cameroon virus DNA B, complete sequence'
begomovirus	'NC_038455.1 Sauropus leaf curl virus isolate AFSP5e segment A, complete sequence'
begomovirus	'NC_013423.1 Vernonia yellow vein betasatellite, complete genome'
begomovirus	'NC_021202.1 Ageratum Yellow vein China virus - OX1, complete genome'
begomovirus	'NC_015489.1 Rhynchosai mild mosaic virus DNA B, complete genome'
begomovirus	'NC_005842.1 Tomato leaf curl Iran virus, complete genome'
begomovirus	'NC_010837.1 Blainvillea yellow spot virus DNA-A, complete genome'
begomovirus	'NC_004646.1 Squash mild leaf curl virus-[Imperial Valley] DNA B, complete sequence'
begomovirus	'NC_007067.1 Ageratum yellow vein China virus-associated DNA beta, complete genome'
begomovirus	'NC_038980.1 Duranta leaf curl virus isolate 57SA segment DNA-A, complete sequence'
begomovirus	'NC_043122.1 Tomato golden leaf distortion virus isolate TO45 coat protein-like, replication enhancer protein-like, transactivator protein-like, and replication-associated protein-like genes, complete sequence'
begomovirus	'NC_009647.1 Kudzu mosaic virus DNA-B, complete sequence'
begomovirus	'NC_043121.1 Eupatorium yellow vein virus-[Japan: Kagawa: Tomato: 1997] DNA, complete genome'
begomovirus	'NC_011052.2 Sweet potato leaf curl Spain virus, complete genome'
begomovirus	'NC_013413.1 Tomato leaf curl Sulawesi virus DNA-A, complete genome'
begomovirus	'NC_016572.1 Cleome leaf crumple virus DNA-B, complete genome'
begomovirus	'NC_004659.1 Sida golden mosaic Honduras virus DNA A, complete sequence'
begomovirus	'NC_038463.1 Soybean blistering mosaic virus isolate NOA segment DNA-A, complete sequence'
begomovirus	'NC_005853.2 Tomato yellow margin leaf curl virus segment DNA B, complete sequence'
begomovirus	'NC_010950.1 Tomato yellow vein streak virus DNA-B, complete genome'
begomovirus	'NC_014707.1 Papaya leaf crumple virus-Panipat 8 [India:Panipat:Papaya:2008] DNA-A, complete genome'
begomovirus	'NC_014128.1 Sida golden mottle virus DNA-B, complete genome'
begomovirus	'NC_004583.1 Cotton leaf curl Kokhran virus, complete genome'
begomovirus	'NC_038896.1 Tomato leaf curl Diana virus cp, v2, rep, c2, c3, and c4 genes, isolated in Namakely, Madagascar'
begomovirus	'NC_037611.1 Pavonia yellow mosaic virus isolate BR-Alb51-14 segment DNA-B, complete sequence'
begomovirus	'NC_038978.1 Lycianthes yellow mosaic virus isolate GD segment DNA-A, complete sequence'
begomovirus	'NC_031764.1 Passionfruit leaf distortion virus isolate Colombia-Valle-2014 segment A, complete sequence'
begomovirus	'NC_038981.1 Pavonia mosaic virus isolate BR-Cor40-14 segment DNA-A, complete sequence'
begomovirus	'NC_004637.1 Sida mottle virus, complete genome'
begomovirus	'NC_028138.1 Melon chlorotic leaf curl virus-[Guatemala] nuclear shuttle protein (BV1) and movement protein (BC1) genes, complete cds'
begomovirus	'NC_023034.1 Tomato leaf curl Gandhinagar virus isolate pToGNAX15 segment DNA-A, complete sequence'
begomovirus	'NC_030699.1 Ramie mosaic Yunnan virus isolate 4819-5 segment DNA-A, complete sequence'
begomovirus	'NC_006874.1 Tomato leaf curl Madagascar virus-Menabe [Madagascar:Morondova:2001], complete genome'
begomovirus	'NC_014447.1 Sida golden mosaic Florida virus-Malvastrum DNA-B, complete genome'
begomovirus	'NC_038804.1 Rhynchosia rugose golden mosaic virus-[Cuba:Camaguey:171:2009] segment DNA-B, complete sequence'
begomovirus	'NC_038453.1 Pouzolzia mosaic Guangdong virus isolate GD1 segment DNA-A, complete sequence'
begomovirus	'NC_009606.1 Tomato leaf curl Sinaloa virus DNA A, complete sequence'
begomovirus	'NC_011181.1 Okra mottle virus - [Brazil:okra] DNA A, complete sequence'
begomovirus	'NC_001508.1 Tomato golden mosaic virus DNA B, complete sequence'
begomovirus	'NC_024693.1 Sweet potato leaf curl Guangxi virus isolate China:Guangxi5:2011, complete genome'
begomovirus	'NC_003887.1 Cabbage leaf curl virus nuclear shuttle movement protein (BV1) and movement/pathogenicity protein (BC1) genes, complete cds'
begomovirus	'NC_004090.1 Ageratum yellow vein China virus-[Hn2] complete genome, isolate Hn2'
begomovirus	'NC_038982.1 Cnidoscolus mosaic leaf deformation virus isolate BR-Mes3-15 segment DNA-A, complete sequence'
begomovirus	'NC_004300.1 Croton yellow vein mosaic virus, complete genome'
begomovirus	'NC_009354.1 Sida yellow vein Madurai virus, complete genome'
begomovirus	'NC_043526.1 Jacquemontia yellow vein virus isolate 1915 clone 1 segment DNA-A, complete sequence'
begomovirus	'NC_001438.1 Bean golden yellow mosaic virus DNA B, complete sequence'
begomovirus	'NC_010236.1 Tomato leaf curl Joydebpur virus satellite DNA beta, complete genome'
begomovirus	'NC_005852.2 Tomato yellow margin leaf curl virus segment DNA A, complete sequence'
begomovirus	'NC_015490.1 Merremia mosaic Puerto Rico virus DNA A, complete genome'
begomovirus	'NC_038807.1 Tomato golden vein virus isolate DF[BR:Ita1220:03] segment DNA-A, complete sequence'
begomovirus	'NC_026513.1 Asystasia mosaic Madagascar virus isolate MG493 segment DNA-B, complete sequence'
begomovirus	'NC_012665.1 Malvastrum yellow vein Baoshan virus DNA-A, complete genome'
begomovirus	'NC_012666.1 Emilia yellow vein virus-associated DNA beta, complete genome'
begomovirus	'NC_009548.1 Tomato yellow leaf curl Vietnam virus DNA-A, complete sequence'
begomovirus	'NC_038965.1 Tomato chlorotic mottle Guyane virus isolate GF:Mon2:GF455:09 segment DNA-A, complete sequence'
begomovirus	'NC_016576.1 Asystasia begomovirus 1 isolate ABgV1 segment DNA-B, complete sequence'
begomovirus	'NC_038445.1 Cowpea golden mosaic virus-[Nigeria] DNA-A, complete sequence'
begomovirus	'NC_038888.1 Tobacco leaf curl Comoros virus cp, v2, rep, c2, c3 and c4 genes, isolated in Simboussa, Comoros'
begomovirus	'NC_038962.1 Jatropha leaf curl Gujarat virus, complete genome'
begomovirus	'NC_015487.1 Bean yellow mosaic Mexico virus DNA-A, complete genome'
begomovirus	'NC_010328.1 Malachra yellow vein mosaic virus-associated satellite DNA beta, complete genome'
begomovirus	'NC_031466.1 Lisianthus enation leaf curl virus DNA, complete genome, isolate: BG-1'
begomovirus	'NC_008329.1 Tomato leaf curl Guangxi virus, complete genome'
begomovirus	'NC_039082.1 Euphorbia mosaic virus Peru DNA-A, complete genome'
begomovirus	'NC_040192.1 Desmodium mottle virus isolate UG5 segment DNA-B, complete sequence'
begomovirus	'NC_004640.1 Sweet potato leaf curl Georgia virus, complete genome'
begomovirus	'NC_005874.1 Zinnia leaf curl virus-associated DNA beta, complete genome'
begomovirus	'NC_038913.1 Ageratum yellow vein Hualian virus-[Taiwan:Hualian4:2000] segment DNA A, complete sequence'
begomovirus	'NC_014380.1 Melon chlorotic mosaic virus DNA-A, complete genome'
begomovirus	'NC_038974.1 Whitefly associated Guetamala alphasatellite 1 isolate GtTo2-2, complete sequence'
begomovirus	'NC_038468.1 Tomato bright yellow mottle virus isolate TO167 segment DNA-A, complete sequence'
begomovirus	'NC_004612.1 Tomato leaf curl New Delhi virus DNA B, complete sequence'
begomovirus	'NC_014067.1 Okra yellow mosaic Mexico virus DNA B, complete genome'
begomovirus	'NC_038475.1 Vigna yellow mosaic virus isolate Yautepec-2007 segment A, complete sequence'
begomovirus	'NC_031451.1 Wissadula yellow mosaic virus isolate ALW35_5B segment DNA-A, complete sequence'
begomovirus	'NC_025265.1 Tomato mottle wrinkle virus isolate Ar:Pichanal:400 segment DNA-A, complete sequence'
begomovirus	'NC_004097.1 Macroptilium mosaic Puerto Rico virus DNA A, complete sequence'
begomovirus	'NC_026763.1 Malvastrum yellow vein Cambodia virus isolate 08 segment DNA-A, complete sequence'
begomovirus	'NC_003664.1 Tomato chlorotic mottle virus DNA A, complete sequence'
begomovirus	'NC_005031.1 Tomato leaf curl Java virus, complete genome'
begomovirus	'NC_038471.1 Tomato leaf curl New Delhi virus 4 isolate TC306 segment DNA-A, complete sequence'
begomovirus	'NC_004558.1 Tomato leaf curl Gujarat virus - [Varanasi] segment A, complete sequence'
begomovirus	'NC_011309.2 Jatropha yellow mosaic virus segment DNA-A, complete sequence'
begomovirus	'NC_005048.1 Chilli leaf curl disease associated sequence virion, complete genome'
begomovirus	'NC_015043.1 Sida mosaic Bolivia virus 2 DNA-A, complete genome'
begomovirus	'NC_003896.1 Tomato leaf curl virus, complete genome'
begomovirus	'NC_040184.1 Cnidoscolus mosaic leaf deformation virus isolate BR-Mes3-15 segment DNA-B, complete sequence'
begomovirus	'NC_005851.1 Tomato mosaic leaf curl virus DNA B, complete genome'
begomovirus	'NC_025680.1 Tomato yellow leaf curl Axarquia virus isolate Homra, complete genome'
begomovirus	'NC_011024.1 TYLCAxV-Sic1-[IT:Sic2/2:04], complete genome'
begomovirus	'NC_038441.1 Chilli leaf curl Kanpur virus [India/Kanpur/2008] clone pChKanB19 segment DNA-A, complete sequence'
begomovirus	'NC_014381.1 Melon chlorotic mosaic virus DNA-B, complete genome'
begomovirus	'NC_000869.1 Tomato yellow leaf curl Thailand virus DNA A, complete sequence'
begomovirus	'NC_001828.1 Tomato mottle Taino virus DNA A, complete sequence'
begomovirus	'NC_004091.1 Stachytarpheta leaf curl virus, complete genome'
begomovirus	'NC_038686.1 Tomato leaf curl Malaysia betasatellite, complete sequence'
begomovirus	'NC_014379.1 Melon chlorotic mosaic virus-associated alphasatellite, complete genome'
begomovirus	'NC_037306.1 Rhynchosia golden mosaic virus isolate Soybean 1068 segment DNA-A, complete sequence'
begomovirus	'NC_024009.1 Allamanda leaf mottle distortion virus isolate Al-K1 segment DNA-A, complete sequence'
begomovirus	'NC_004356.1 Tobacco leaf curl Yunnan virus - [Y136], complete genome'
begomovirus	'NC_015488.1 Rhynchosai mild mosaic virus DNA-A, complete genome'
begomovirus	'NC_011583.1 East African cassava mosaic Kenya virus DNA A, complete genome'
begomovirus	'NC_005844.1 Papaya leaf curl Guandong virus - [GD2] DNA A, complete sequence'
begomovirus	'NC_038805.1 Rhynchosia rugose golden mosaic virus-[Cuba:Camaguey:171:2009] segment DNA-A, complete sequence'
begomovirus	'NC_005348.1 Tomato leaf curl Mali virus, complete genome'
begomovirus	'NC_038449.1 Jatropha mosaic India virus-[Lucknow] strain SK-2 segment DNA-A, complete sequence'
begomovirus	'NC_012118.1 Pedilanthus leaf curl virus-Pedilanthus [Pakistan:Multan:2004], complete genome'
begomovirus	'NC_040181.1 Jacquemontia yellow mosaic virus isolate [Venezuela:Rio Cocollar 1250:2009] segment DNA-B, complete sequence'
begomovirus	'NC_038877.1 East African cassava mosaic Malawi virus-Malawi[K] AV1, AV2 and AC1 genes, (isolate MK)'
begomovirus	'NC_001507.1 Tomato golden mosaic virus DNA A, complete sequence'
begomovirus	'NC_031448.1 Macroptilium common mosaic virus isolate ALM2_5B segment DNA-A, complete sequence'
begomovirus	'NC_003830.1 Chino del tomate virus DNA A, complete sequence'
begomovirus	'NC_004581.1 Cotton leaf crumple geminivirus DNA B, complete sequence'
begomovirus	'NC_008793.1 Honeysuckle yellow vein mosaic virus-[Kagoshima], complete genome'
begomovirus	'NC_038963.1 Tomato latent virus isolate T2+, complete genome'
begomovirus	'NC_015397.1 Cleome golden mosaic virus DNA-A, complete genome'
begomovirus	'NC_038960.1 Jacquemontia yellow mosaic virus isolate [Venezuela:Rio Cocollar 1250:2009] segment DNA-A, complete sequence'
begomovirus	'NC_038800.1 Rhynchosia golden mosaic Havana virus-[Cuba:Havana:28:2007] segment DNA-A, complete sequence'
begomovirus	'NC_016998.1 Centrosema yellow spot virus DNA-A, complete genome'
begomovirus	'NC_019034.1 Jatropha mosaic Nigerian virus isolate 2 segment DNA-A, complete sequence'
begomovirus	'NC_016581.1 Tomato dwarf leaf virus DNA-B, complete genome'
begomovirus	'NC_004647.1 Tomato leaf curl Sri Lanka virus, complete genome'
begomovirus	'NC_038794.1 Cotton chlorotic spot virus isolate Brazil:CampinaGrandeB012:2009 segment DNA-A, complete sequence'
begomovirus	'NC_018717.1 Datura leaf distortion virus isolate Venezuela:Rubio 933:2007 segment DNA-A, complete sequence'
begomovirus	'NC_001359.1 Pepper huasteco yellow vein virus segment A, complete sequence'
begomovirus	'NC_004101.1 Pepper golden mosaic virus DNA A, complete sequence'
begomovirus	'NC_004658.1 Sida golden mosaic Costa Rica virus DNA B, complete sequence'
begomovirus	'NC_004634.1 Malvastrum yellow vein virus, complete genome'
begomovirus	'NC_038968.1 VEM begomovirus 2 isolate GtSq5 segment DNA-A, complete sequence'
begomovirus	'NC_031306.1 Synedrella leaf curl virus isolate YN3306, complete genome'
begomovirus	'NC_031452.1 Macroptilium bright mosaic virus isolate ALM33_5B segment DNA-A, complete sequence'
begomovirus	'NC_004096.1 Pepper golden mosaic virus DNA B, complete sequence'
begomovirus	'NC_005319.1 Euphorbia leaf curl virus DNA A, complete sequence'
begomovirus	'NC_004613.1 Tomato leaf curl Laos virus, complete genome'
begomovirus	'NC_003862.1 Sri Lankan cassava mosaic virus-[Colombo] DNA-B, complete genome, isolate SLCMV-Col'
begomovirus	'NC_008316.1 Malvastrum leaf curl Guangdong virus, complete genome'
begomovirus	'NC_014066.1 Okra yellow mosaic Mexico virus DNA A, complete genome'
begomovirus	'NC_043120.1 Eupatorium yellow vein virus-[Suya] DNA, complete genome, isolate: Suya-2003'
begomovirus	'NC_001439.1 Bean golden yellow mosaic virus DNA A, complete sequence'
begomovirus	'NC_025964.1 Catharanthus yellow mosaic virus complete genome, isolate DR-151'
begomovirus	'NC_022644.1 East African cassava mosaic Malawi virus clone EACMMV[MA:S8:07]B segment DNA-B, complete sequence'
begomovirus	'NC_010953.1 Macroptilium golden mosaic virus-[Jamaica:Wissadula:August Town] DNA B, complete sequence'
begomovirus	'NC_040183.1 Tomato chlorotic mottle Guyane virus isolate GF:Mon2:GF455:09 segment DNA-B, complete sequence'
begomovirus	'NC_038464.1 Sweet potato leaf curl China virus segment A, complete sequence'
begomovirus	'NC_005846.1 Squash leaf curl Philippines virus segment B, complete genome'
begomovirus	'NC_038802.1 Rhynchosia golden mosaic Sinaloa virus segment A, complete sequence'
begomovirus	'NC_018716.1 Dalechampia chlorotic mosaic virus isolate Venezuela:Albarico 1020:2007 segment DNA-A, complete sequence'
begomovirus	'NC_005338.2 Dolichos yellow mosaic virus isolate DA segment DNA A, complete sequence'
begomovirus	'NC_017913.1 Tomato yellow leaf distortion virus clone EF5N segment DNA-B, complete sequence'
begomovirus	'NC_038971.1 VEM begomovirus 6 isolate PR10-1 segment DNA-A, complete sequence'
begomovirus	'NC_003865.1 Melon chlorotic leaf curl virus DNA A, complete sequence'
begomovirus	'NC_043524.1 Bean leaf crumple virus isolate HA segment DNA-A, complete sequence'
begomovirus	'NC_007210.2 Ludwigia yellow vein virus DNA-A, complete genome'
begomovirus	'NC_019569.1 Bean chlorosis virus isolate Venezuela:La Barinesa 459:2006 segment DNA-A, complete sequence'
begomovirus	'NC_001468.1 African cassava mosaic virus isolate West Kenyan 844 segment DNA2, complete sequence'
begomovirus	'NC_007639.1 Sida leaf curl virus-associated DNA beta, complete genome'
begomovirus	'NC_015045.1 Abutilon mosaic Bolivia virus DNA-A, complete genome'
begomovirus	'NC_009449.1 Honeysuckle yellow vein beta-[Japan:Fukui:2001], complete genome'
begomovirus	'NC_004099.1 Macroptilium yellow mosaic Florida virus DNA A, complete sequence'
begomovirus	'NC_043203.1 Ipomea begomovirus satellite 1 isolate PR3-2, complete sequence'
begomovirus	'NC_004611.1 Tomato leaf curl New Delhi virus DNA A, complete sequence'
begomovirus	'NC_038956.1 Jatropha leaf yellow mosaic Katarniaghat virus isolate Katerniaghat 2 segment DNA-A, complete sequence'
begomovirus	'NC_028989.1 Pepper yellow leaf curl Thailand virus isolate KON-KG5 segment DNA-A, complete sequence'
begomovirus	'NC_024490.1 Mirabilis leaf curl India virus associated betasatellite complete sequence, isolate Pragpur'
begomovirus	'NC_004607.1 Cotton leaf curl Multan virus, complete genome'
begomovirus	'NC_003868.1 Tomato mosaic Havana virus DNA B, complete sequence'
begomovirus	'NC_031454.1 Sida chlorotic vein virus isolate BLS15_2E segment DNA-B, complete sequence'
begomovirus	'NC_012786.1 Passionfruit severe leaf distortion virus DNA-A, complete genome'
begomovirus	'NC_025244.1 Synedrella leaf curl alphasatellite isolate Synd-1, complete sequence'
begomovirus	'NC_012482.1 Rhynchosia golden mosaic Yucatan virus DNA B, complete genome'
begomovirus	'NC_001934.1 Potato yellow mosaic virus DNA A, complete sequence'
begomovirus	'NC_025681.1 Sweet potato leaf curl Sao Paulo virus isolate SPLCSPV-[BR:AlvM:09], complete genome'
begomovirus	'NC_031458.1 Malvastrum bright yellow mosaic virus isolate Ma8S clone Ma8S-5A segment DNA-A, complete sequence'
begomovirus	'NC_013467.1 Sweet potato leaf curl Lanzarote virus, complete genome'
begomovirus	'NC_004639.1 Sida yellow mosaic virus, complete genome'
begomovirus	'NC_001935.1 Potato yellow mosaic virus DNA B, complete sequence'
begomovirus	'NC_043513.1 Bhendi yellow vein Haryana virus [2003:Karnal] isolate OY76 segment DNA-A, complete sequence'
begomovirus	'NC_028130.1 Luffa begomovirus betasatellite isolate WOK73, complete sequence'
begomovirus	'NC_005807.1 Honeysuckle yellow vein virus-[UK1], complete genome'
begomovirus	'NC_009491.1 Tomato mild yellow leaf curl Aragua virus DNA B, complete sequence'
begomovirus	'NC_003434.1 Ageratum enation virus, complete genome'
begomovirus	'NC_013022.2 Ipomoea yellow vein virus, complete genome'
begomovirus	'NC_003860.1 Squash yellow mild mottle virus DNA B, complete sequence'
begomovirus	'NC_012553.1 Euphorbia yellow mosaic virus DNA A, complete genome'
begomovirus	'NC_028142.1 Melochia yellow mosaic virus DNA A, complete sequence'
begomovirus	'NC_043514.1 Vernonia yellow vein Fujian virus isolate VeYVFjV segment DNA-A, complete sequence'
begomovirus	'NC_006995.1 Senecio yellow mosaic virus, complete genome'
begomovirus	'NC_026514.1 Asystasia mosaic Madagascar virus isolate MG493 segment DNA-A, complete sequence'
begomovirus	'NC_018715.1 Datura leaf distortion virus isolate Venezuela:Rubio 933:2007 segment DNA-B, complete sequence'
begomovirus	'NC_035481.1 Tomato leaf curl purple vein virus isolate BR:793:15 clone P793, complete genome'
begomovirus	'NC_004650.1 Sweet potato leaf curl virus DNA A, complete sequence'
begomovirus	'NC_010833.1 Tomato mild mosaic virus DNA-A, complete genome'
non-begomovirus	'KT214420.1 Alfalfa leaf curl virus isolate LD14_Lag1 V3 (V3) gene, complete cds'
non-begomovirus	'MH603825.1 Alfalfa leaf curl virus isolate 248, complete genome'
non-begomovirus	'KY316024.1 Grapevine red-blotch associated virus isolate ONRB6, complete genome'
non-begomovirus	'NC_018579.1 Digitaria ciliaris striate mosaic virus, complete genome'
non-begomovirus	'MG792039.1 Alfalfa leaf curl virus isolate Sunchales, complete genome'
non-begomovirus	'MG792038.1 Alfalfa leaf curl virus isolate Saladillo, complete genome'
non-begomovirus	'NC_038478.1 Chickpea yellows mastrevirus isolate CpYV_AU_3489B_2002, complete genome'
non-begomovirus	'KY618120.1 Maize streak virus isolate MSV-A_MU_Jic_Rob5_1990, complete genome'
non-begomovirus	'KT214388.1 Euphorbia caput-medusae latent virus isolate DAR12_CM251, complete genome'
non-begomovirus	'KY316012.1 UNVERIFIED: Grapevine red-blotch associated virus isolate BCRB23, complete genome'
non-begomovirus	'NC_014324.1 Turnip curly top virus, complete genome'
non-begomovirus	'KT583729.1 Beet curly top virus isolate California B4-2, complete genome'
non-begomovirus	'KT276919.1 Beet curly top virus isolate CTS10-91, complete genome'
non-begomovirus	'KC571253.1 Beet curly top Iran virus isolate Iran:Fariman:6Beet:Sugar beet:2010, complete genome'
non-begomovirus	'MF510411.1 Prunus geminivirus A isolate PL9 clone PL9-4, complete genome'
non-begomovirus	'MF795161.1 Grapevine red blotch virus isolate NPPS9, complete genome'
non-begomovirus	'KT388069.1 Turnip curly top virus clone Z2-26, complete genome'
non-begomovirus	'MH603840.1 Alfalfa leaf curl virus isolate LAl2_17, complete genome'
non-begomovirus	'FJ546181.1 Wheat dwarf virus isolate CZ11229 movement protein (MP), coat protein (CP), replication-associated protein (Rep), and replication-associated protein A (RepA) genes, complete cds'
non-begomovirus	'KM230031.1 Maize streak Reunion virus isolate R103, complete genome'
non-begomovirus	'MF344550.1 Sesame yellow mosaic virus isolate SeYMV_386, complete genome'
non-begomovirus	'MH603820.1 Alfalfa leaf curl virus isolate 51UK, complete genome'
non-begomovirus	'KC427994.1 Grapevine redleaf-associated virus isolate GiGV-WA-DS, complete genome'
non-begomovirus	'KX867018.1 Beet curly top virus isolate CTS06-013, complete genome'
non-begomovirus	'KT214363.1 Alfalfa leaf curl virus isolate PB14_LUZ182, complete genome'
non-begomovirus	'KX867053.1 Beet curly top virus isolate CTS15-086, complete genome'
non-begomovirus	'KT214373.1 Alfalfa leaf curl virus isolate VAU14_LUZ142, complete genome'
non-begomovirus	'JX945571.1 Beet curly top Iran virus isolate IR:Oru:7Beet:Sug:10, complete genome'
non-begomovirus	'KM229783.1 Chickpea chlorotic dwarf virus isolate CpCDV_C_SD_SD31_2013, complete genome'
non-begomovirus	'NC_018577.1 Sporobolus striate mosaic virus 1, complete genome'
non-begomovirus	'MH603831.1 Alfalfa leaf curl virus isolate I25, complete genome'
non-begomovirus	'KT214374.1 Alfalfa leaf curl virus isolate PB14_GS8, complete genome'
non-begomovirus	'MH603835.1 Alfalfa leaf curl virus isolate I44, complete genome'
non-begomovirus	'KY426921.1 Grapevine red-blotch associated virus isolate 93-21, complete genome'
non-begomovirus	'JQ647469.1 Wheat dwarf virus isolate HUNGARY-MO10-3, complete genome'
non-begomovirus	'NC_011058.1 Chickpea chlorotic dwarf virus, complete genome'
non-begomovirus	'KY565234.1 Sweetpotato symptomless mastrevirus 1 isolate Z01117, complete genome'
non-begomovirus	'KP221559.1 Grapevine red-blotch associated virus isolate 1, complete genome'
non-begomovirus	'KX234092.1 Grapevine red-blotch associated virus isolate BCRB5, complete genome'
non-begomovirus	'NC_001478.1 Digitaria streak virus, complete genome'
non-begomovirus	'KY304952.1 Maize streak virus isolate MSV_KE_Tha2_K281Bh1_11, complete genome'
non-begomovirus	'JQ901105.2 Grapevine red-blotch associated virus isolate JRT[456]17NOV10, complete genome'
non-begomovirus	'KY316021.1 Grapevine red-blotch associated virus isolate ONRB3, complete genome'
non-begomovirus	'KT214377.1 Euphorbia caput-medusae latent virus isolate DAR12_CM26, complete genome'
non-begomovirus	'KJ536130.1 Wheat dwarf virus isolate YNKM08-2, complete genome'
non-begomovirus	'KX867028.1 Beet curly top virus isolate CTS06-091, complete genome'
non-begomovirus	'KX867056.1 Beet curly top virus isolate CTS15-113, complete genome'
non-begomovirus	'KU821056.1 Grapevine red-blotch associated virus isolate SW6, complete genome'
non-begomovirus	'MK955834.1 Grapevine red blotch virus isolate TN224 coat protein gene, complete cds'
non-begomovirus	'KT214383.1 Euphorbia caput-medusae latent virus isolate DAR12_CM162, complete genome'
non-begomovirus	'KY498153.1 Grapevine red blotch virus isolate OH15-79 capsid protein gene, complete cds'
non-begomovirus	'MF504036.1 Prunus geminivirus A clone AP13-4, complete genome'
non-begomovirus	'KT958236.1 Wheat dwarf virus isolate SYZHS06, complete genome'
non-begomovirus	'KF147918.1 Grapevine red blotch-associated virus isolate NY137 coat protein gene, complete cds'
non-begomovirus	'KT214423.1 Alfalfa leaf curl virus isolate SSL14_Toul2 V3 (V3) gene, complete cds'
non-begomovirus	'MH751505.1 Beet curly top Iran virus isolate BCTIV-[IR:Mash:Pep1:Pep:16], complete genome'
non-begomovirus	'KT214409.1 Alfalfa leaf curl virus isolate PB14_GS19 V3 (V3) gene, complete cds'
non-begomovirus	'MG792023.1 Alfalfa leaf curl virus isolate Palma Sola, complete genome'
non-begomovirus	'KM377669.1 Chickpea chlorotic dwarf virus isolate PK32, complete genome'
non-begomovirus	'NC_018578.1 Sporobolus striate mosaic virus 2, complete genome'
non-begomovirus	'KX867049.1 Beet curly top virus isolate CTS14-071, complete genome'
non-begomovirus	'KX867051.1 Beet curly top virus isolate CTS15-001, complete genome'
non-begomovirus	'MF185010.1 Wild vitis virus 1 isolate WVV1-NY1616, complete genome'
non-begomovirus	'JQ707945.1 Beet curly top Iran virus isolate IR:Neg:B26P:Sug:08, complete genome'
non-begomovirus	'MG976083.1 Wild vitis virus 1 isolate Solano8, complete genome'
non-begomovirus	'KT214421.1 Alfalfa leaf curl virus isolate LD14_Lag2 V3 (V3) gene, complete cds'
non-begomovirus	'KT276916.1 Beet curly top virus isolate CTS07-96, complete genome'
non-begomovirus	'KY304987.1 Maize streak virus isolate MSV_KE_Kis18_K89B_08, complete genome'
non-begomovirus	'KX867052.1 Beet curly top virus isolate CTS15-045, complete genome'
non-begomovirus	'MH603830.1 Alfalfa leaf curl virus isolate I23, complete genome'
non-begomovirus	'KT388081.1 Turnip leaf roll virus clone Z2-24, complete genome'
non-begomovirus	'KY316015.1 Grapevine red-blotch associated virus isolate BCRB26, complete genome'
non-begomovirus	'KU522121.1 Grapevine geminivirus isolate RK-1, complete genome'
non-begomovirus	'MH603850.1 Alfalfa leaf curl virus isolate ES44, complete genome'
non-begomovirus	'AY548948.1 Beet curly top virus isolate spinach 3, complete genome'
non-begomovirus	'JQ707941.1 Beet curly top Iran virus isolate IR:Kav:B22K:Sug:08, complete genome'
non-begomovirus	'KT214358.1 Alfalfa leaf curl virus isolate TDV12_48-2A, complete genome'
non-begomovirus	'FJ882100.1 Maize streak virus isolate MSV-A_MZ_Pem6_Moz42-2007, complete genome'
non-begomovirus	'KC896625.1 Grapevine red blotch-associated virus isolate Z1A-1, complete genome'
non-begomovirus	'MG792027.1 Alfalfa leaf curl virus isolate Villa Castelli, complete genome'
non-begomovirus	'NC_003493.2 Bean yellow dwarf virus putative genes V1, V2, C1, C1:C2'
non-begomovirus	'MF795165.1 Grapevine red blotch virus isolate VSCS3, complete genome'
non-begomovirus	'KT583748.1 Beet curly top virus isolate California LH71, complete genome'
non-begomovirus	'KX234089.1 Grapevine red-blotch associated virus isolate BCRB2, complete genome'
non-begomovirus	'KT276902.1 Beet curly top virus isolate CTS07-20, complete genome'
non-begomovirus	'KU564252.1 Grapevine red-blotch associated virus isolate NY704, complete genome'
non-begomovirus	'JQ707942.1 Beet curly top Iran virus isolate IR:Kam:B23K:Sug:08, complete genome'
non-begomovirus	'MG792026.1 Alfalfa leaf curl virus isolate Colonia Dora, complete genome'
non-begomovirus	'KM229769.1 Chickpea chlorotic dwarf virus isolate CpCDV_C_SD_SD12_2013, complete genome'
non-begomovirus	'KY304953.1 Maize streak virus isolate MSV_KE_Emb2_K282Bh1_11, complete genome'
non-begomovirus	'MF795158.1 Grapevine red blotch virus isolate LNCF1, complete genome'
non-begomovirus	'MF185003.1 Wild vitis virus 1 isolate WVV1-NY1308, complete genome'
non-begomovirus	'KT214361.1 Alfalfa leaf curl virus isolate VAU14_LUZ136, complete genome'
non-begomovirus	'NC_023989.1 Sugarcane white streak virus isolate SSNV-B [SD-B0069-2013], complete genome'
non-begomovirus	'NC_018530.1 Paspalum striate mosaic virus, complete genome'
non-begomovirus	'KT276908.1 Beet curly top virus isolate CTS07-23, complete genome'
non-begomovirus	'KT583749.1 Beet curly top virus isolate SJ, complete genome'
non-begomovirus	'MF510414.1 Prunus geminivirus A isolate PL13 clone PL13-2, complete genome'
non-begomovirus	'HQ693352.1 Maize streak virus isolate MSV-A_MZ_Map2_Moz17-2007, complete genome'
non-begomovirus	'KM079155.1 Wheat dwarf virus isolate WDV-B, complete genome'
non-begomovirus	'KM229973.1 Maize streak virus isolate K239, complete genome'
non-begomovirus	'MH603828.1 Alfalfa leaf curl virus isolate 38, complete genome'
non-begomovirus	'KY498155.1 Grapevine red blotch virus isolate OH15-109 capsid protein gene, complete cds'
non-begomovirus	'MF795159.1 Grapevine red blotch virus isolate LNCF6, complete genome'
non-begomovirus	'MF185004.1 Wild vitis virus 1 isolate WVV1-NY1325, complete genome'
non-begomovirus	'MF504038.1 Prunus geminivirus A clone AP16-14, complete genome'
non-begomovirus	'MF795177.1 Grapevine red blotch virus isolate COMB133, complete genome'
non-begomovirus	'JQ707944.1 Beet curly top Iran virus isolate IR:Neg:B25P:Sug:08, complete genome'
non-begomovirus	'KX533467.1 Turnip curly top virus isolate TCTV_IR_CZ1_2013, complete genome'
non-begomovirus	'KT276915.1 Beet curly top virus isolate CTS07-88, complete genome'
non-begomovirus	'KX867057.1 Beet curly top virus isolate CTS15-149, complete genome'
non-begomovirus	'KY316025.1 Grapevine red-blotch associated virus isolate ONRB7, complete genome'
non-begomovirus	'JX945569.1 Beet curly top Iran virus isolate IR:Toro:1B:Sug:10, complete genome'
non-begomovirus	'MK422440.1 Alfalfa leaf curl virus isolate SLSC410-3 V3 gene, complete cds'
non-begomovirus	'MH085200.1 Alfalfa leaf curl virus isolate CO7, complete genome'
non-begomovirus	'KT214367.1 Alfalfa leaf curl virus isolate PB14_LUZ171, complete genome'
non-begomovirus	'NC_022131.1 Chickpea chlorosis Australia virus isolate CpCV-D_AU_3494I_2002, complete genome'
non-begomovirus	'NC_003326.1 Wheat dwarf virus, complete genome'
non-begomovirus	'MF795168.1 Grapevine red blotch virus isolate COZN403, complete genome'
non-begomovirus	'MF510410.1 Prunus geminivirus A isolate PL8 clone PL8-11, complete genome'
non-begomovirus	'NC_037063.1 Limeum africanum associated virus isolate 2-12-F, complete genome'
non-begomovirus	'KT214410.1 Alfalfa leaf curl virus isolate ASS14_Assas3 V3 (V3) gene, complete cds'
non-begomovirus	'MH603856.1 Alfalfa leaf curl virus isolate TuAl5_17, complete genome'
non-begomovirus	'U56975.1 Beet mild curly top virus - [Worland], complete genome'
non-begomovirus	'MF510412.1 Prunus geminivirus A isolate PL10 clone PL10-3, complete genome'
non-begomovirus	'NC_038477.1 Plantago lanceolata latent virus isolate ALA13_Pl11, complete genome'
non-begomovirus	'EU628594.1 Maize streak virus isolate MSV-B1_Za-Nat-M43-1988, complete genome'
non-begomovirus	'KT214352.1 Alfalfa leaf curl virus isolate ASS14_Assas2, complete genome'
non-begomovirus	'KT214380.1 Euphorbia caput-medusae latent virus isolate DAR12_CM192, complete genome'
non-begomovirus	'MH595451.1 Sesame curly top virus isolate IR/Jir/JK_7-4/14, complete genome'
non-begomovirus	'MH595446.1 Sesame curly top virus isolate IR/Orz/LH_4-5/14, complete genome'
non-begomovirus	'KT276897.1 Beet curly top virus isolate CTS06-76, complete genome'
non-begomovirus	'MH603851.1 Alfalfa leaf curl virus isolate ES52, complete genome'
non-begomovirus	'MG792030.1 Alfalfa leaf curl virus isolate Malargue, complete genome'
non-begomovirus	'MH595450.1 Sesame curly top virus isolate IR/Jir/JK_6-2/14, complete genome'
non-begomovirus	'KY316023.1 Grapevine red-blotch associated virus isolate ONRB5, complete genome'
non-begomovirus	'KT214401.1 Alfalfa leaf curl virus isolate ALB14_LUZ156 V3 (V3) gene, complete cds'
non-begomovirus	'MG672441.1 Grapevine red blotch virus isolate NY175A, complete genome'
non-begomovirus	'MF504032.1 Prunus geminivirus A clone AP9-3, complete genome'
non-begomovirus	'KT583736.1 Beet curly top virus isolate California K1-2, complete genome'
non-begomovirus	'KM229971.1 Maize streak virus isolate K66, complete genome'
non-begomovirus	'KT214375.1 Alfalfa leaf curl virus isolate PB14_LUZ179, complete genome'
non-begomovirus	'KY618116.1 Maize streak virus isolate MSV-A_ZA_Val_g524_2010, complete genome'
non-begomovirus	'MH603857.1 Alfalfa leaf curl virus isolate TuAl8_17, complete genome'
non-begomovirus	'KC108906.1 Turnip curly top virus isolate IR:Zaf:Z5-2:Tur:12, complete genome'
non-begomovirus	'MG792044.1 Alfalfa leaf curl virus isolate Chos Malal, complete genome'
non-begomovirus	'KT388064.1 Turnip curly top virus clone L14, complete genome'
non-begomovirus	'AB935397.1 Tomato curly top virus DNA, complete genome, isolate: JP-Fuk-K2-09'
non-begomovirus	'EU586261.1 Beet curly top virus isolate SLP2, complete genome'
non-begomovirus	'MH603841.1 Alfalfa leaf curl virus isolate LAl3_17, complete genome'
non-begomovirus	'KT214419.1 Alfalfa leaf curl virus isolate SAL14_Pru4 V3 (V3) gene, complete cds'
non-begomovirus	'MF276895.1 Grapevine red blotch virus isolate Z_A2V13, complete genome'
non-begomovirus	'NC_015051.1 Spinach curly top Arizona virus, complete genome'
non-begomovirus	'KT276911.1 Beet curly top virus isolate CTS07-53, complete genome'
non-begomovirus	'MH603834.1 Alfalfa leaf curl virus isolate I42, complete genome'
non-begomovirus	'NC_034629.1 Pepper yellow dwarf virus - Mexico strain PepYDV-Curto, complete genome'
non-begomovirus	'MK422438.1 Alfalfa leaf curl virus isolate SLSC410-1, complete genome'
non-begomovirus	'MK955833.1 Grapevine red blotch virus isolate TN220 coat protein gene, complete cds'
non-begomovirus	'MF795146.1 Grapevine red blotch virus isolate BVMR68, complete genome'
non-begomovirus	'NC_032004.1 Sugarcane chlorotic streak virus isolate Sc10-SR-1, complete genome'
non-begomovirus	'FJ545686.1 Beet curly top virus isolate LRME27607, complete genome'
non-begomovirus	'MH595445.1 Sesame curly top virus isolate IR/Orz/LH_4-2/14, complete genome'
non-begomovirus	'KJ536093.1 Wheat dwarf virus isolate HNZZ08-4, complete genome'
non-begomovirus	'MF185005.1 Wild vitis virus 1 isolate WVV1-NY1358, complete genome'
non-begomovirus	'KX234088.1 Grapevine red-blotch associated virus isolate BCRB1, complete genome'
non-begomovirus	'MG792021.1 Alfalfa leaf curl virus isolate La Angelina, complete genome'
non-begomovirus	'KJ536090.1 Wheat dwarf virus isolate HNJZ07-1, complete genome'
non-begomovirus	'MF795154.1 Grapevine red blotch virus isolate CYCS77, complete genome'
non-begomovirus	'MH476300.1 Grapevine red blotch virus isolate NSRB7, complete genome'
non-begomovirus	'KX867041.1 Beet curly top virus isolate CTS13-028, complete genome'
non-begomovirus	'KU892791.1 Beet curly top virus isolate BCTV_2009, complete genome'
non-begomovirus	'GQ415391.1 Panicum streak virus isolate E_KE_Jic10_PSVKN, complete genome'
non-begomovirus	'KT276901.1 Beet curly top virus isolate CTS14-24, complete genome'
non-begomovirus	'MF795163.1 Grapevine red blotch virus isolate OLSY6, complete genome'
non-begomovirus	'NC_040537.1 Rice latent virus 2 isolate AU-NA24-2015, complete genome'
non-begomovirus	'MF185008.1 Wild vitis virus 1 isolate WVV1-NY1467, complete genome'
non-begomovirus	'KT583743.1 Beet curly top virus isolate California M2-4, complete genome'
non-begomovirus	'KU564255.1 Grapevine red-blotch associated virus isolate NY921, complete genome'
non-begomovirus	'JX966233.1 Beet curly top Iran virus isolate IR:Sabz:134T:Tomato:10, complete genome'
non-begomovirus	'NC_001412.1 Beet curly top virus - California [Logan], complete genome'
non-begomovirus	'KT583740.1 Beet curly top virus isolate California LH7-3-5, complete genome'
non-begomovirus	'KT583738.1 Beet curly top virus isolate California K5, complete genome'
non-begomovirus	'KT583739.1 Beet curly top virus isolate California KB1-1, complete genome'
non-begomovirus	'NC_019498.1 Dragonfly-associated alphasatellite isolate PR_NZ48_2009, complete sequence'
non-begomovirus	'MK928385.1 Grapevine red blotch virus isolate GRBV_IDB8_Merlot_2011, complete genome'
non-begomovirus	'MK803280.1 Beet curly top virus isolate BCTV-Can, complete genome'
non-begomovirus	'MH205606.1 Maize streak virus - A[Ama] isolate KARLO, complete genome'
non-begomovirus	'FJ665632.1 Eragrostis curvula streak virus isolate ECSV-ZA-Gre3-g257-2007, complete genome'
non-begomovirus	'MF504029.1 Prunus geminivirus A clone OL3-22, complete genome'
non-begomovirus	'MG792024.1 Alfalfa leaf curl virus isolate Victoria, complete genome'
non-begomovirus	'MH476295.1 UNVERIFIED: Grapevine red blotch virus isolate NSRB2, complete genome'
non-begomovirus	'FJ882139.1 Maize streak virus isolate MSV-A_ZA_Wil_O38-1993, complete genome'
non-begomovirus	'MH476296.1 Grapevine red blotch virus isolate NSRB3, complete genome'
non-begomovirus	'KX867023.1 Beet curly top virus isolate CTS06-068, complete genome'
non-begomovirus	'NC_014631.1 Spinach severe curly top virus, complete genome'
non-begomovirus	'KT214408.1 Alfalfa leaf curl virus isolate PB14_GS10 V3 (V3) gene, complete cds'
non-begomovirus	'MG792035.1 Alfalfa leaf curl virus isolate Santa Eufemia, complete genome'
non-begomovirus	'MH603837.1 Alfalfa leaf curl virus isolate JoAl26-17, complete genome'
non-begomovirus	'MH603816.1 Alfalfa leaf curl virus isolate MS7, complete genome'
non-begomovirus	'KC108896.1 Turnip curly top virus isolate IR:Lap:L16:Tur:12, complete genome'
non-begomovirus	'NC_004755.1 Sugarcane streak virus reunion, complete genome'
non-begomovirus	'JX945572.1 Beet curly top Iran virus isolate IR:Tabr:8RB:Red beet:10, complete genome'
non-begomovirus	'MH020804.1 Alfalfa leaf curl virus isolate Tual6-17, complete genome'
non-begomovirus	'KY316022.1 Grapevine red-blotch associated virus isolate ONRB4, complete genome'
non-begomovirus	'NC_023864.1 Axonopus compressus streak virus isolate ACSV_NG_g84_oba_2007, complete genome'
non-begomovirus	'KT276920.1 Beet curly top virus isolate CTS11-88, complete genome'
non-begomovirus	'KX867047.1 Beet curly top virus isolate CTS14-067, complete genome'
non-begomovirus	'FJ665630.1 Eragrostis curvula streak virus isolate ECSV-ZA-Gre4-Ky3-2008, complete genome'
non-begomovirus	'NC_029117.1 Turnip leaf roll virus clone Th2, complete genome'
non-begomovirus	'KT276904.1 Beet curly top virus isolate CTS06-14, complete genome'
non-begomovirus	'KT214415.1 Alfalfa leaf curl virus isolate LAT14_Lat8 V3 (V3) gene, complete cds'
non-begomovirus	'KM229781.1 Chickpea chlorotic dwarf virus isolate CpCDV_C_SD_SD29_2013, complete genome'

## Sheet: Sheet2
DNA-A	'NC_001928.2 Abutilon mosaic virus subgenome DNA A'
DNA-A	'NC_001467.1 African cassava mosaic virus isolate West Kenyan 844 segment DNA1, complete sequence'
DNA-A	'NC_001934.1 Potato yellow mosaic virus DNA A, complete sequence'
DNA-A	'NC_001936.1 Squash leaf curl virus A component DNA, complete sequence'
DNA-A	'NC_001507.1 Tomato golden mosaic virus DNA A, complete sequence'
DNA-A	'NC_004005.1 Tomato yellow leaf curl virus, complete genome'
DNA-A	'NC_001938.1 Tomato mottle virus DNA A, complete sequence'
DNA-A	'NC_001931.1 Bean dwarf mosaic virus DNA A, complete genome'
DNA-A	'NC_004042.1 Bean golden mosaic virus DNA A, complete sequence'
DNA-A	'NC_003896.1 Tomato leaf curl virus, complete genome'
DNA-A	'NC_001932.1 Indian cassava mosaic virus DNA A, complete sequence'
DNA-A	'NC_003504.1 Bean calico mosaic virus DNA A coat protein (AV1), replication enhancer protein (AC3), transcription activator protein (AC2), replication initiator protein (AC1), and AC4 (AC4) genes, complete cds'
DNA-A	'NC_001983.1 Mungbean yellow mosaic virus DNA A, complete sequence'
DNA-A	'NC_003708.1 Watermelon chlorotic stunt virus DNA A, complete sequence'
DNA-A	'NC_004626.1 Ageratum yellow vein virus, complete genome'
DNA-A	'NC_027040.1 Ageratum yellow vein virus strain Guam 12-02 segment A, complete sequence'
DNA-A	'NC_003830.1 Chino del tomate virus DNA A, complete sequence'
DNA-A	'NC_002046.1 Sida golden mosaic virus coat protein (AV1), AC3 (AC3), transactivator protein (AC2), replication associated protein (AC1), and AC4 (AC4) genes, complete cds'
DNA-A	'NC_003866.1 Cabbage leaf curl virus coat protein (AV1), replicase associated protein (AC3), transactivator protein (AC2), replicase associated protein (AC1) and AC4 genes, complete cds'
DNA-A	'NC_010948.1 Wissadula golden mosaic St Thomas Virus DNA A, complete sequence'
DNA-A	'NC_010952.1 Macroptilium golden mosaic virus-[Jamaica:Wissadula:August Town] DNA A, complete sequence'
DNA-A	'NC_031760.1 Cotton leaf curl virus isolate Faz-14, complete genome'
DNA-A	'NC_004147.1 Papaya leaf curl virus, complete genome'
DNA-A	'NC_010949.1 Tomato yellow vein streak virus DNA-A, complete genome'
DNA-A	'NC_038450.1 Leonurus mosaic virus isolate PR 88 segment DNA-A, complete sequence'
DNA-A	'NC_004674.1 East African cassava mosaic virus DNA A, complete sequence'
DNA-A	'NC_003803.1 South African cassava mosaic virus DNA A, complete sequence'
DNA-A	'NC_029994.1 Tobacco leaf curl virus isolate KH6, complete genome'
DNA-A	'NC_009606.1 Tomato leaf curl Sinaloa virus DNA A, complete sequence'
DNA-A	'NC_024012.1 Jatropha mosaic virus strain Jamaica:Spanish Town:2004 clone A1 segment DNA-A, complete sequence'
DNA-A	'NC_004580.1 Cotton leaf crumple virus DNA A, complete sequence'
DNA-A	'NC_007965.1 Merremia mosaic virus DNA A, complete sequence'
DNA-A	'NC_030310.1 Cotton yellow mosaic virus isolate Benin-Gossypium raimondii-55-14 segment DNA-A, complete sequence'
DNA-A	'NC_000882.1 Pepper leaf curl virus, complete genome'
DNA-A	'NC_000869.1 Tomato yellow leaf curl Thailand virus DNA A, complete sequence'
DNA-A	'NC_003357.1 Soybean crinkle leaf virus, complete genome'
DNA-A	'NC_019946.1 Tomato yellow mottle virus segment DNA-A, complete sequence'
DNA-A	'NC_004642.1 Tomato severe leaf curl virus, complete genome'
DNA-A	'NC_003856.1 Dicliptera yellow mottle virus DNA A, complete sequence'
DNA-A	'NC_005032.1 Tomato leaf curl Philippines virus, complete genome'
DNA-A	'NC_004650.1 Sweet potato leaf curl virus DNA A, complete sequence'
DNA-A	'NC_010294.1 Rhynchosia golden mosaic virus DNA A, complete sequence'
DNA-A	'NC_037306.1 Rhynchosia golden mosaic virus isolate Soybean 1068 segment DNA-A, complete sequence'
DNA-A	'NC_003418.1 Bhendi yellow vein mosaic virus, complete genome'
DNA-A	'NC_003828.1 Tomato yellow leaf curl Sardinia virus, complete genome'
DNA-A	'NC_004675.1 Tomato curly stunt virus, complete genome'
DNA-A	'NC_002555.1 Tomato rugose mosaic virus DNA A, complete sequence'
DNA-A	'NC_002984.1 Cucurbit leaf crumple virus DNA A, complete sequence'
DNA-A	'NC_009607.1 Tomato severe rugose virus DNA A, complete sequence'
DNA-A	'NC_013017.1 Okra leaf curl virus-[Cameroon], complete genome'
DNA-A	'NC_038884.1 Hollyhock leaf curl virus, complete genome, isolate [Pakistan:20-4:06] Faisalabad3'
DNA-A	'NC_010647.1 Macroptilium yellow mosaic virus DNA A, complete sequence'
DNA-A	'NC_004628.1 Chilli leaf curl virus, complete genome'
DNA-A	'NC_003664.1 Tomato chlorotic mottle virus DNA A, complete sequence'
DNA-A	'NC_032006.1 Tomato mottle leaf curl virus isolate BR-PB44-14 segment DNA-A, complete sequence'
DNA-A	'NC_014380.1 Melon chlorotic mosaic virus DNA-A, complete genome'
DNA-A	'NC_003722.1 Tobacco curly shoot virus, complete genome'
DNA-A	'NC_003609.1 Honeysuckle yellow vein mosaic virus, complete genome'
DNA-A	'NC_004044.1 Tomato yellow leaf curl China virus, complete genome'
DNA-A	'NC_003556.1 Eupatorium yellow vein virus, complete genome'
DNA-A	'NC_003434.1 Ageratum enation virus, complete genome'
DNA-A	'NC_004637.1 Sida mottle virus, complete genome'
DNA-A	'NC_004639.1 Sida yellow mosaic virus, complete genome'
DNA-A	'NC_003898.1 Tomato leaf curl Taiwan virus, complete genome'
DNA-A	'NC_038890.1 Tobacco leaf rugose virus DNA-A, complete sequence'
DNA-A	'NC_004071.1 Hollyhock leaf crumple virus, complete genome'
DNA-A	'NC_004091.1 Stachytarpheta leaf curl virus, complete genome'
DNA-A	'NC_004824.1 Loofa yellow mosaic virus DNA A, complete sequence'
DNA-A	'NC_004300.1 Croton yellow vein mosaic virus, complete genome'
DNA-A	'NC_004153.1 Tomato leaf curl Vietnam virus DNA A, complete genome'
DNA-A	'NC_004356.1 Tobacco leaf curl Yunnan virus - [Y136], complete genome'
DNA-A	'NC_004558.1 Tomato leaf curl Gujarat virus - [Varanasi] segment A, complete sequence'
DNA-A	'NC_004569.1 Tomato yellow leaf curl Malaga virus, complete genome'
DNA-A	'NC_001439.1 Bean golden yellow mosaic virus DNA A, complete sequence'
DNA-A	'NC_003891.1 Tomato leaf curl Bangalore virus, complete genome'
DNA-A	'NC_003897.1 Tomato leaf curl Karnataka virus, complete genome'
DNA-A	'NC_004090.1 Ageratum yellow vein China virus-[Hn2] complete genome, isolate Hn2'
DNA-A	'NC_002981.1 Ageratum yellow vein Sri Lanka virus segment A, complete genome'
DNA-A	'NC_004627.1 Ageratum yellow vein Taiwan virus, complete genome'
DNA-A	'NC_038791.1 Bean golden yellow mosaic virus-[Dominican Republic] coat protein (AR1), AL3 protein (AL3), and AL2 protein (AL2) genes, complete cds'
DNA-A	'NC_004618.1 Chayote yellow mosaic virus, complete genome'
DNA-A	'NC_004582.1 Cotton leaf curl Alabad virus, complete genome'
DNA-A	'NC_002510.1 Cotton leaf curl Gezira virus, complete genome'
DNA-A	'NC_038444.1 Cotton leaf curl Gezira virus-[Cotton] A component, complete genome'
DNA-A	'NC_004583.1 Cotton leaf curl Kokhran virus, complete genome'
DNA-A	'NC_004651.1 Squash leaf curl Yunnan virus, complete genome'
DNA-A	'NC_004634.1 Malvastrum yellow vein virus, complete genome'
DNA-A	'NC_003199.1 Cotton leaf curl Multan virus segment A, complete sequence'
DNA-A	'NC_004607.1 Cotton leaf curl Multan virus, complete genome'
DNA-A	'NC_038445.1 Cowpea golden mosaic virus-[Nigeria] DNA-A, complete sequence'
DNA-A	'NC_004625.1 East African cassava mosaic Cameroon virus DNA A, complete sequence'
DNA-A	'NC_022645.1 East African cassava mosaic Malawi virus clone EACMMV[MA:07:S4] AV2 (AV2), CP (AV1), REn (AC3), TrAP (AC2), and Rep genes, complete cds'
DNA-A	'NC_038877.1 East African cassava mosaic Malawi virus-Malawi[K] AV1, AV2 and AC1 genes, (isolate MK)'
DNA-A	'NC_004655.1 East African cassava mosaic Zanzibar virus DNA-A, complete genome'
DNA-A	'NC_043418.1 Eupatorium yellow vein virus-[MNS2] complete genome, isolate Fukuoka-MNS2'
DNA-A	'NC_004097.1 Macroptilium mosaic Puerto Rico virus DNA A, complete sequence'
DNA-A	'NC_004099.1 Macroptilium yellow mosaic Florida virus DNA A, complete sequence'
DNA-A	'NC_004732.1 Melon chlorotic leaf curl virus-[Guatemala] component A, complete sequence'
DNA-A	'NC_004608.1 Mungbean yellow mosaic India virus DNA A, complete sequence'
DNA-A	'NC_004101.1 Pepper golden mosaic virus DNA A, complete sequence'
DNA-A	'NC_001359.1 Pepper huasteco yellow vein virus segment A, complete sequence'
DNA-A	'NC_004192.1 Pepper leaf curl Bangladesh virus segment A component, complete genome'
DNA-A	'NC_002048.1 Potato yellow mosaic Panama virus segment A, complete sequence'
DNA-A	'NC_004638.1 Potato yellow mosaic Trinidad virus DNA A, complete sequence'
DNA-A	'NC_004657.1 Sida golden mosaic Costa Rica virus DNA A, complete sequence'
DNA-A	'NC_004659.1 Sida golden mosaic Honduras virus DNA A, complete sequence'
DNA-A	'NC_038460.1 Sida golden yellow vein virus-[A11], complete genome'
DNA-A	'NC_004661.1 Sida yellow vein virus DNA A, complete sequence'
DNA-A	'NC_004645.1 Squash mild leaf curl virus-[Imperial Valley] DNA A, complete sequence'
DNA-A	'NC_003861.1 Sri Lankan cassava mosaic virus-[Colombo] DNA-A, complete genome, isolate SLCMV-Col'
DNA-A	'NC_004654.1 Tobacco leaf curl Japan virus, complete genome'
DNA-A	'NC_004641.1 Tobacco leaf curl Kochi virus, complete genome'
DNA-A	'NC_002817.1 Tobacco leaf curl Zimbabwe virus, complete genome'
DNA-A	'NC_008058.1 Tomato golden mottle virus DNA A, complete sequence'
DNA-A	'NC_004614.1 Tomato leaf curl Bangladesh virus, complete genome'
DNA-A	'NC_004613.1 Tomato leaf curl Laos virus, complete genome'
DNA-A	'NC_004648.1 Tomato leaf curl Malaysia virus, complete genome'
DNA-A	'NC_004611.1 Tomato leaf curl New Delhi virus DNA A, complete sequence'
DNA-A	'NC_004647.1 Tomato leaf curl Sri Lanka virus, complete genome'
DNA-A	'NC_003867.1 Tomato mosaic Havana virus-[Quivican] DNA, segment A'
DNA-A	'NC_001828.1 Tomato mottle Taino virus DNA A, complete sequence'
DNA-A	'NC_004640.1 Sweet potato leaf curl Georgia virus, complete genome'
DNA-A	'NC_004673.1 Okra yellow vein mosaic virus, complete genome'
DNA-A	'NC_005330.1 Sida micrantha mosaic virus segment A, complete sequence'
DNA-A	'NC_005321.1 Papaya leaf curl China virus - [G8], complete genome'
DNA-A	'NC_005320.1 Tomato leaf curl China virus - [G32], complete sequence'
DNA-A	'NC_025680.1 Tomato yellow leaf curl Axarquia virus isolate Homra, complete genome'
DNA-A	'NC_005843.1 Tomato chino La Paz virus segment A, complete genome'
DNA-A	'NC_005807.1 Honeysuckle yellow vein virus-[UK1], complete genome'
DNA-A	'NC_027215.1 Tomato yellow leaf curl Mali virus complete genome, isolate Tom-141'
DNA-A	'NC_005347.1 Pepper yellow vein Mali virus, complete genome'
DNA-A	'NC_005348.1 Tomato leaf curl Mali virus, complete genome'
DNA-A	'NC_005850.1 Tomato mosaic leaf curl virus DNA A, complete genome'
DNA-A	'NC_005852.2 Tomato yellow margin leaf curl virus segment DNA A, complete sequence'
DNA-A	'NC_005031.1 Tomato leaf curl Java virus, complete genome'
DNA-A	'NC_005635.1 Horsegram yellow mosaic virus, complete genome'
DNA-A	'NC_005812.1 Tomato yellow leaf curl Kanchanaburi virus DNA A, complete sequence'
DNA-A	'NC_043119.1 Eupatorium yellow vein virus - [Yamaguchi] DNA, complete genome'
DNA-A	'NC_007339.1 Squash leaf curl China virus - [B] DNA-A, complete genome'
DNA-A	'NC_005845.1 Squash leaf curl Philippines virus segment A, complete genome'
DNA-A	'NC_005319.1 Euphorbia leaf curl virus DNA A, complete sequence'
DNA-A	'NC_005842.1 Tomato leaf curl Iran virus, complete genome'
DNA-A	'NC_005855.1 Tomato leaf curl Sudan virus - [Gezira], complete genome'
DNA-A	'NC_005844.1 Papaya leaf curl Guandong virus - [GD2] DNA A, complete sequence'
DNA-A	'NC_006631.1 Malvastrum yellow vein Yunnan virus, complete genome'
DNA-A	'NC_017987.1 Sida yellow mosaic China virus - [Hainan 8] complete genome, isolate Hn7'
DNA-A	'NC_008283.1 Pepper yellow leaf curl Indonesia virus DNA-A, complete genome'
DNA-A	'NC_006358.1 Corchorus yellow vein virus - [Hoa Binh] DNA A, complete genome'
DNA-A	'NC_038807.1 Tomato golden vein virus isolate DF[BR:Ita1220:03] segment DNA-A, complete sequence'
DNA-A	'NC_008374.1 Tomato yellow leaf curl Guangdong virus DNA A, complete sequence'
DNA-A	'NC_006384.1 Ageratum leaf curl virus - [G52], complete genome'
DNA-A	'NC_009550.1 Lindernia anagallis yellow vein virus DNA-A, complete sequence'
DNA-A	'NC_006956.1 Begomovirus-associated DNA-II, complete genome'
DNA-A	'NC_006957.1 Begomovirus-associated DNA-III, complete genome'
DNA-A	'NC_006876.1 Tomato leaf curl Mayotte virus, complete genome'
DNA-A	'NC_007290.1 Cotton leaf curl Bangalore virus segment A, complete genome'
DNA-A	'NC_007723.1 Tomato leaf curl Joydebpur virus DNA-A, complete genome'
DNA-A	'NC_006995.1 Senecio yellow mosaic virus, complete genome'
DNA-A	'NC_007210.2 Ludwigia yellow vein virus DNA-A, complete genome'
DNA-A	'NC_009451.1 Clerodendron yellow mosaic virus, complete genome'
DNA-A	'NC_014066.1 Okra yellow mosaic Mexico virus DNA A, complete genome'
DNA-A	'NC_007724.1 Malvastrum leaf curl virus - [G87], complete genome'
DNA-A	'NC_005338.2 Dolichos yellow mosaic virus isolate DA segment DNA A, complete sequence'
DNA-A	'NC_038879.1 Eupatorium yellow vein virus-[SOJ3] complete genome, isolate Fukuoka-SOJ3'
DNA-A	'NC_035887.1 Tobacco leaf curl Cuba virus isolate CU/frijol 8/2014 segment DNA-A, complete sequence'
DNA-A	'NC_007638.1 Sida leaf curl virus, complete genome'
DNA-A	'NC_007211.1 Alternanthera yellow vein virus DNA-A, complete genome'
DNA-A	'NC_038473.1 Tomato leaf curl Uganda virus - [Iganga] segment A, complete sequence'
DNA-A	'NC_038792.1 Cabbage leaf curl Jamaica virus clone 1910 Cu-A6 segment DNA-A, complete sequence'
DNA-A	'NC_009088.1 Mesta yellow vein mosaic virus DNA-A, complete sequence'
DNA-A	'NC_038439.1 Boerhavia yellow spot virus isolate Yucatan segment DNA A, complete sequence'
DNA-A	'NC_008494.1 Desmodium leaf distortion virus DNA A, complete sequence'
DNA-A	'NC_007726.1 Tomato yellow spot virus DNA-A, complete genome'
DNA-A	'NC_007730.2 Vernonia yellow vein virus DNA-A, complete genome'
DNA-A	'NC_008059.1 Sida mosaic Sinaloa virus DNA A, complete sequence'
DNA-A	'NC_008236.1 Siegesbeckia yellow vein virus-[GD13], complete genome'
DNA-A	'NC_038798.1 Malvastrum yellow mosaic Jamaica virus isolate Ma179A73 segment DNA-A, complete sequence'
DNA-A	'NC_008559.1 Malvastrum yellow mosaic virus DNA-A, complete genome'
DNA-A	'NC_008329.1 Tomato leaf curl Guangxi virus, complete genome'
DNA-A	'NC_008316.1 Malvastrum leaf curl Guangdong virus, complete genome'
DNA-A	'NC_008317.1 Siegesbeckia yellow vein Guangxi virus, complete genome'
DNA-A	'NC_009644.1 Corchorus golden mosaic virus DNA-A, complete sequence'
DNA-A	'NC_009645.1 Kudzu mosaic virus DNA-A, complete sequence'
DNA-A	'NC_010713.1 Clerodendrum golden mosaic virus DNA-A, complete sequence'
DNA-A	'NC_009545.1 Spilanthes yellow vein virus DNA-A, complete sequence'
DNA-A	'NC_009546.1 Mimosa yellow leaf curl virus DNA-A, complete sequence'
DNA-A	'NC_009547.1 Sida yellow vein Vietnam virus DNA-A, complete sequence'
DNA-A	'NC_009548.1 Tomato yellow leaf curl Vietnam virus DNA-A, complete sequence'
DNA-A	'NC_009549.1 Erectites yellow mosaic virus DNA-A, complete sequence'
DNA-A	'NC_038451.1 Ludwigia yellow vein Vietnam virus segment DNA-A, complete sequence'
DNA-A	'NC_009030.1 Tomato leaf curl Arusha virus DNA-A, complete sequence'
DNA-A	'NC_011583.1 East African cassava mosaic Kenya virus DNA A, complete genome'
DNA-A	'NC_008267.1 Tomato yellow leaf curl Indonesia virus-[Lembang], complete genome'
DNA-A	'NC_008373.1 Tomato leaf curl Guangdong virus DNA-A, complete sequence'
DNA-A	'NC_008377.1 Okra yellow crinkle virus segment A, complete sequence'
DNA-A	'NC_008492.1 Corchorus yellow spot virus DNA A, complete sequence'
DNA-A	'NC_008517.1 Tomato leaf curl Pune virus, complete genome'
DNA-A	'NC_038463.1 Soybean blistering mosaic virus isolate NOA segment DNA-A, complete sequence'
DNA-A	'NC_008779.1 Sida yellow mosaic Yucatan virus DNA A, complete sequence'
DNA-A	'NC_009553.1 Tobacco leaf curl Thailand virus, complete genome'
DNA-A	'NC_038881.1 Euphorbia leaf curl Guangxi virus complete genome, isolate G35-1'
DNA-A	'NC_008794.1 Crassocephalum yellow vein virus - Jinghong, complete genome'
DNA-A	'NC_038472.1 Tomato leaf curl Rajasthan virus - [India:Rajasthan:2005] segment A, complete sequence'
DNA-A	'NC_009354.1 Sida yellow vein Madurai virus, complete genome'
DNA-A	'NC_010946.1 Pumpkin yellow mosaic Malaysia virus DNA A, complete sequence'
DNA-A	'NC_009031.1 Tomato leaf curl Seychelles virus, complete genome'
DNA-A	'NC_008304.1 Euphorbia mosaic virus - A [Mexico:Yucatan:2004] clone pEuMV-YP-A segment DNA-A, complete sequence'
DNA-A	'NC_010238.1 Radish leaf curl virus segment A, complete sequence'
DNA-A	'NC_043120.1 Eupatorium yellow vein virus-[Suya] DNA, complete genome, isolate: Suya-2003'
DNA-A	'NC_038913.1 Ageratum yellow vein Hualian virus-[Taiwan:Hualian4:2000] segment DNA A, complete sequence'
DNA-A	'NC_010812.1 Ageratum yellow vein Hualian virus-[Taiwan:Hsinchu:tom:2003] DNA A, complete sequence'
DNA-A	'NC_038899.1 Tomato leaf curl Namakely virus, isolate Madagascar:Namakely:2001'
DNA-A	'NC_038894.1 Tomato leaf curl Anjouan virus, isolate Comoros:Ouani:2004'
DNA-A	'NC_038888.1 Tobacco leaf curl Comoros virus cp, v2, rep, c2, c3 and c4 genes, isolated in Simboussa, Comoros'
DNA-A	'NC_038897.1 Tomato leaf curl Moheli virus cp, v2, c2 c3 and c4 genes, isolated in Fomboni, Comoros'
DNA-A	'NC_038896.1 Tomato leaf curl Diana virus cp, v2, rep, c2, c3, and c4 genes, isolated in Namakely, Madagascar'
DNA-A	'NC_038901.1 Tomato leaf curl Toliara virus cp, v2, rep, c2, c3 and c4 genes, isolated in Miandrivazo, Madagascar'
DNA-A	'NC_010947.1 Allamanda leaf curl virus DNA-A, complete genome'
DNA-A	'NC_012481.1 Rhynchosia golden mosaic Yucatan virus DNA A, complete genome'
DNA-A	'NC_010791.1 Ramie mosaic virus DNA A, complete sequence'
DNA-A	'NC_010307.1 Emilia yellow vein virus-[Fz1], complete genome'
DNA-A	'NC_010313.1 Tomato leaf curl Ghana virus segment A, complete genome'
DNA-A	'NC_010439.1 Tomato leaf curl Cebu virus DNA-A, complete genome'
DNA-A	'NC_010441.2 Tomato leaf curl Cotabato virus DNA-A, complete genome'
DNA-A	'NC_010440.1 Tomato leaf curl Mindanao virus DNA-A, complete genome'
DNA-A	'NC_010818.1 Mesta yellow vein mosaic Bahraich virus-[India:Bahraich:2007] DNA A, complete sequence'
DNA-A	'NC_010435.1 Kenaf leaf curl virus DNA A, complete sequence'
DNA-A	'NC_011804.1 Gossypium darwinii symptomless virus DNA-A, complete genome'
DNA-A	'NC_011805.1 Gossypium punctatum mild leaf curl virus DNA A, complete genome'
DNA-A	'NC_010618.1 Pepper leaf curl Yunnan virus-[YN323], complete sequence'
DNA-A	'NC_043121.1 Eupatorium yellow vein virus-[Japan: Kagawa: Tomato: 1997] DNA, complete genome'
DNA-A	'NC_010840.1 Tomato leaf curl Palampur virus DNA A, complete sequence'
DNA-A	'NC_038885.1 Rhynchosia yellow mosaic virus, segment DNA-A, complete genome'
DNA-A	'NC_038893.1 Tobacco mottle leaf curl virus AV1 gene, AC1 gene, AC2 gene, AC3 gene and AC4 gene'
DNA-A	'NC_010837.1 Blainvillea yellow spot virus DNA-A, complete genome'
DNA-A	'NC_038457.1 Sida common mosaic virus isolate BR:Coi4:07 segment DNA-A, complete sequence'
DNA-A	'NC_038461.1 Sida yellow leaf curl virus isolate BR:Coi3:07 segment DNA-A, complete sequence'
DNA-A	'NC_010835.1 Tomato common mosaic virus DNA-A, complete genome'
DNA-A	'NC_038474.1 Tomato leaf distortion virus isolate BR:Pda4:05 segment DNA-A, complete sequence'
DNA-A	'NC_010833.1 Tomato mild mosaic virus DNA-A, complete genome'
DNA-A	'NC_011268.1 Jatropha leaf curl virus DNA A, complete genome'
DNA-A	'NC_011096.1 Tomato leaf curl Kumasi virus segment A, complete sequence'
DNA-A	'NC_011135.1 Tomato leaf curl Kerala virus, complete genome'
DNA-A	'NC_011346.1 Clerodendrum golden mosaic China virus DNA A, complete genome'
DNA-A	'NC_015627.1 Tobacco yellow crinkle virus DNA A, complete genome'
DNA-A	'NC_038449.1 Jatropha mosaic India virus-[Lucknow] strain SK-2 segment DNA-A, complete sequence'
DNA-A	'NC_013467.1 Sweet potato leaf curl Lanzarote virus, complete genome'
DNA-A	'NC_012492.1 Tomato leaf curl Patna virus DNA-A, complete genome'
DNA-A	'NC_038875.1 Chilli leaf curl India virus segment A, complete genome'
DNA-A	'NC_013019.1 Sunn hemp leaf distortion virus DNA-A, complete genome'
DNA-A	'NC_011919.1 Bhendi yellow vein Delhi virus [2004:New Delhi] DNA-A, complete genome'
DNA-A	'NC_012041.1 Bhendi yellow vein Bhubhaneswar virus DNA-A, complete genome'
DNA-A	'NC_012553.1 Euphorbia yellow mosaic virus DNA A, complete genome'
DNA-A	'NC_011024.1 TYLCAxV-Sic1-[IT:Sic2/2:04], complete genome'
DNA-A	'NC_012206.1 Tomato leaf curl Nigeria virus-[Nigeria:2006], complete genome'
DNA-A	'NC_011181.1 Okra mottle virus - [Brazil:okra] DNA A, complete sequence'
DNA-A	'NC_008299.1 Pedilanthus leaf curl virus isolate Rahim Yar Khan 1 segment A, complete sequence'
DNA-A	'NC_012118.1 Pedilanthus leaf curl virus-Pedilanthus [Pakistan:Multan:2004], complete genome'
DNA-A	'NC_012137.1 Cotton leaf curl Burewala virus - [India:Vehari:2004], complete genome'
DNA-A	'NC_013413.1 Tomato leaf curl Sulawesi virus DNA-A, complete genome'
DNA-A	'NC_012665.1 Malvastrum yellow vein Baoshan virus DNA-A, complete genome'
DNA-A	'NC_038452.1 Malvastrum yellow mosaic Helshire virus isolate Ma179A5 segment DNA-A, complete sequence'
DNA-A	'NC_012786.1 Passionfruit severe leaf distortion virus DNA-A, complete genome'
DNA-A	'NC_038876.1 Clerodendrum golden mosaic Jiangsu virus complete DNA-A genome, isolate YX2'
DNA-A	'NC_011348.1 Tomato yellow leaf distortion virus DNA A, complete genome'
DNA-A	'NC_011052.2 Sweet potato leaf curl Spain virus, complete genome'
DNA-A	'NC_013465.1 Sweet potato leaf curl Canary virus, complete genome'
DNA-A	'NC_013022.2 Ipomoea yellow vein virus, complete genome'
DNA-A	'NC_043513.1 Bhendi yellow vein Haryana virus [2003:Karnal] isolate OY76 segment DNA-A, complete sequence'
DNA-A	'NC_013102.1 Tomato leaf curl Hainan virus, complete genome'
DNA-A	'NC_014138.1 Abutilon Brazil virus DNA A segment, complete sequence'
DNA-A	'NC_016578.1 Cleome leaf crumple virus DNA-A, complete genome'
DNA-A	'NC_038887.1 Sida Brazil virus segment DNA A, complete sequence'
DNA-A	'NC_013414.1 Velvet bean severe mosaic virus DNA A, complete genome'
DNA-A	'NC_014473.1 Croton yellow vein virus, complete genome'
DNA-A	'NC_029648.1 Cotton leaf curl Shadadpur virus, complete genome, isolate Sha'
DNA-A	'NC_030749.1 Malvastrum yellow vein Honghe virus segment DNA-A, complete sequence, isolate Y249'
DNA-A	'NC_014510.2 Tomato leaf deformation virus DNA-A, complete genome'
DNA-A	'NC_015324.1 Sweet potato golden vein associated virus, complete genome'
DNA-A	'NC_013640.2 Sweet potato leaf curl Bengal virus - [India:West Bengal:2008] segment A, complete genome'
DNA-A	'NC_013639.1 Tomato leaf curl Cameroon virus - [Cameroon:Buea:Okra:2008], complete genome'
DNA-A	'NC_014542.1 Tomato leaf curl Oman virus, complete genome'
DNA-A	'NC_015488.1 Rhynchosai mild mosaic virus DNA-A, complete genome'
DNA-A	'NC_015490.1 Merremia mosaic Puerto Rico virus DNA A, complete genome'
DNA-A	'NC_015487.1 Bean yellow mosaic Mexico virus DNA-A, complete genome'
DNA-A	'NC_038980.1 Duranta leaf curl virus isolate 57SA segment DNA-A, complete sequence'
DNA-A	'NC_014130.1 Sida golden mottle virus DNA-A, complete genome'
DNA-A	'NC_014140.1 Soybean mild mottle virus, complete genome'
DNA-A	'NC_014141.1 Soybean chlorotic blotch virus DNA A, complete genome'
DNA-A	'NC_043122.1 Tomato golden leaf distortion virus isolate TO45 coat protein-like, replication enhancer protein-like, transactivator protein-like, and replication-associated protein-like genes, complete sequence'
DNA-A	'NC_038468.1 Tomato bright yellow mottle virus isolate TO167 segment DNA-A, complete sequence'
DNA-A	'NC_038462.1 Sidastrum golden leaf spot virus isolate DF334 segment DNA-A, complete sequence'
DNA-A	'NC_038443.1 Chino del tomate Amazonas virus isolate AM10 segment DNA-A, complete sequence'
DNA-A	'NC_015397.1 Cleome golden mosaic virus DNA-A, complete genome'
DNA-A	'NC_014446.1 Sida golden mosaic Florida virus-Malvastrum DNA-A, complete genome'
DNA-A	'NC_024687.1 Rose leaf curl virus isolate AS24, complete genome'
DNA-A	'NC_016660.1 Eclipta yellow vein virus clone EcYVV-[PK,Fai,06], complete genome'
DNA-A	'NC_020236.1 Pepper yellow leaf curl virus isolate YN65-1, complete genome'
DNA-A	'NC_016984.1 Pepper leaf curl Lahore Virus-[Pakistan:Lahore1:2004] segment A, complete genome'
DNA-A	'NC_038800.1 Rhynchosia golden mosaic Havana virus-[Cuba:Havana:28:2007] segment DNA-A, complete sequence'
DNA-A	'NC_038805.1 Rhynchosia rugose golden mosaic virus-[Cuba:Camaguey:171:2009] segment DNA-A, complete sequence'
DNA-A	'NC_014596.1 Tobacco leaf curl Pusa virus DNA-A, complete genome'
DNA-A	'NC_014845.1 Bhendi yellow vein India virus [India:Dharwad OYDWR2:2006] DNA-A, complete genome'
DNA-A	'NC_014847.1 Okra leaf curl India virus [India:Sonipat EL14A:2006] DNA-A, complete genome'
DNA-A	'NC_031754.1 Okra enation leaf curl virus isolate Trincomalee segment DNA-A, complete sequence'
DNA-A	'NC_014894.1 Okra enation leaf curl virus [India:Munthal EL37:2006] DNA-A, complete genome'
DNA-A	'NC_014647.1 Malvastrum yellow vein Changa Manga virus, complete genome'
DNA-A	'NC_014645.1 Ageratum leaf curl Cameroon virus, complete genome'
DNA-A	'NC_014745.1 Okra leaf curl Cameroon virus, complete genome'
DNA-A	'NC_014707.1 Papaya leaf crumple virus-Panipat 8 [India:Panipat:Papaya:2008] DNA-A, complete genome'
DNA-A	'NC_004635.2 Sida golden yellow vein virus-[Jamaica:Liguanea2:2008] DNA-A, complete genome'
DNA-A	'NC_038458.1 Sida golden mosaic Braco virus-[Jamaica:Liguanea:2008] clone pBrA4, complete genome'
DNA-A	'NC_014794.1 Sida golden mosaic Buckup virus-[Jamaica:St. Elizabeth:2004] DNA-A, complete genome'
DNA-A	'NC_015046.1 Sida mosaic Bolivia virus 1 DNA-A, complete genome'
DNA-A	'NC_015043.1 Sida mosaic Bolivia virus 2 DNA-A, complete genome'
DNA-A	'NC_015045.1 Abutilon mosaic Bolivia virus DNA-A, complete genome'
DNA-A	'NC_024304.1 Solanum mosaic Bolivia virus segment DNA-A, complete sequence'
DNA-A	'NC_014902.1 Rhynchosia yellow mosaic India virus DNA-A, complete genome'
DNA-A	'NC_016965.1 Tomato leaf curl Ranchi virus DNA-A, complete genome'
DNA-A	'NC_014968.1 Sweet potato leaf curl Uganda virus-[Uganda:Kampala:2008], complete genome'
DNA-A	'NC_016649.1 Hollyhock yellow vein mosaic virus, complete genome'
DNA-A	'NC_015124.1 Tomato leaf curl Hanoi virus, complete genome'
DNA-A	'NC_015962.1 Tomato chlorotic leaf distortion virus-[Venezuela:Zulia:2004] segment DNA_A, complete sequence'
DNA-A	'NC_025681.1 Sweet potato leaf curl Sao Paulo virus isolate SPLCSPV-[BR:AlvM:09], complete genome'
DNA-A	'NC_006874.1 Tomato leaf curl Madagascar virus-Menabe [Madagascar:Morondova:2001], complete genome'
DNA-A	'NC_028114.1 Tomato leaf curl Comoros virus complete genome, isolate Mayote:Dembeni:2003'
DNA-A	'NC_015317.1 Sweet potato leaf curl South Carolina virus, complete genome'
DNA-A	'NC_038442.1 Chilli Leaf curl Vellanad virus [India/Vellanad/2008] clone pChVelK52 segment DNA-A, complete sequence'
DNA-B	'NC_001929.2 Abutilon mosaic virus subgenome DNA B'
DNA-B	'NC_001468.1 African cassava mosaic virus isolate West Kenyan 844 segment DNA2, complete sequence'
DNA-B	'NC_001935.1 Potato yellow mosaic virus DNA B, complete sequence'
DNA-B	'NC_001937.1 Squash leaf curl virus B component DNA, complete sequence'
DNA-B	'NC_001508.1 Tomato golden mosaic virus DNA B, complete sequence'
DNA-B	'NC_001939.1 Tomato mottle virus DNA B, complete sequence'
DNA-B	'NC_001930.1 Bean dwarf mosaic virus DNA B, complete genome'
DNA-B	'NC_004043.1 Bean golden mosaic virus DNA B, complete sequence'
DNA-B	'NC_001933.1 Indian cassava mosaic virus DNA B, complete sequence'
DNA-B	'NC_003505.1 Bean calico mosaic virus DNA B, complete sequence'
DNA-B	'NC_001984.1 Mungbean yellow mosaic virus DNA B, complete sequence'
DNA-B	'NC_003709.1 Watermelon chlorotic stunt virus DNA B, complete sequence'
DNA-B	'NC_003831.1 Chino del tomate virus DNA B, complete sequence'
DNA-B	'NC_002047.1 Sida golden mosaic virus nuclear transport protein (BV1) and movement/pathogenicity protein (BC1) genes, complete cds'
DNA-B	'NC_010951.1 Wissadula golden mosaic St Thomas Virus DNA B, complete sequence'
DNA-B	'NC_010953.1 Macroptilium golden mosaic virus-[Jamaica:Wissadula:August Town] DNA B, complete sequence'
DNA-B	'NC_010950.1 Tomato yellow vein streak virus DNA-B, complete genome'
DNA-B	'NC_004676.1 East African cassava mosaic virus DNA B, complete sequence'
DNA-B	'NC_003804.1 South African cassava mosaic virus DNA B, complete sequence'
DNA-B	'NC_009605.1 Tomato leaf curl Sinaloa virus DNA B, complete sequence'
DNA-B	'NC_024013.1 Jatropha mosaic virus strain Jamaica:Spanish Town:2004 clone B1 segment DNA-B, complete sequence'
DNA-B	'NC_004581.1 Cotton leaf crumple geminivirus DNA B, complete sequence'
DNA-B	'NC_008305.1 Euphorbia mosaic virus-Yucatan Peninsula DNA B, complete sequence'
DNA-B	'NC_007966.1 Merremia mosaic virus DNA B, complete sequence'
DNA-B	'NC_030311.1 Cotton yellow mosaic virus isolate Benin-Gossypium raimondii-55-14 segment DNA-B, complete sequence'
DNA-B	'NC_000870.1 Tomato yellow leaf curl Thailand virus DNA B, complete sequence'
DNA-B	'NC_019947.1 Tomato yellow mottle virus segment DNA-B, complete sequence'
DNA-B	'NC_003857.1 Dicliptera yellow mottle virus DNA B, complete sequence'
DNA-B	'NC_010293.1 Rhynchosia golden mosaic virus DNA B, complete sequence'
DNA-B	'NC_037305.1 Rhynchosia golden mosaic virus strain 1068 segment DNA-B, complete sequence'
DNA-B	'NC_002556.1 Tomato rugose mosaic virus DNA B, complete sequence'
DNA-B	'NC_002985.1 Cucurbit leaf crumple virus DNA B, complete sequence'
DNA-B	'NC_009612.1 Tomato severe rugose virus DNA B, complete sequence'
DNA-B	'NC_010648.1 Macroptilium yellow mosaic virus DNA B, complete sequence'
DNA-B	'NC_003665.1 Tomato chlorotic mottle virus DNA B, complete sequence'
DNA-B	'NC_014381.1 Melon chlorotic mosaic virus DNA-B, complete genome'
DNA-B	'NC_004825.1 Loofa yellow mosaic virus DNA B, complete sequence'
DNA-B	'NC_004559.1 Tomato leaf curl Gujarat virus - [Varanasi] segment B, complete sequence'
DNA-B	'NC_001438.1 Bean golden yellow mosaic virus DNA B, complete sequence'
DNA-B	'NC_004630.1 East African cassava mosaic Cameroon virus DNA B, complete sequence'
DNA-B	'NC_022644.1 East African cassava mosaic Malawi virus clone EACMMV[MA:S8:07]B segment DNA-B, complete sequence'
DNA-B	'NC_004656.2 East African cassava mosaic Zanzibar virus DNA B, complete sequence'
DNA-B	'NC_004098.1 Macroptilium mosaic Puerto Rico virus DNA B, complete sequence'
DNA-B	'NC_004100.1 Macroptilium yellow mosaic Florida virus DNA B, complete sequence'
DNA-B	'NC_028138.1 Melon chlorotic leaf curl virus-[Guatemala] nuclear shuttle protein (BV1) and movement protein (BC1) genes, complete cds'
DNA-B	'NC_004609.1 Mungbean yellow mosaic India virus DNA B, complete sequence'
DNA-B	'NC_004096.1 Pepper golden mosaic virus DNA B, complete sequence'
DNA-B	'NC_001369.1 Pepper huasteco yellow vein virus DNA B, complete sequence'
DNA-B	'NC_002049.1 Potato yellow mosaic Panama virus segment B, complete sequence'
DNA-B	'NC_004644.1 Potato yellow mosaic Trinidad virus DNA B, complete sequence'
DNA-B	'NC_004658.1 Sida golden mosaic Costa Rica virus DNA B, complete sequence'
DNA-B	'NC_004660.1 Sida golden mosaic Honduras virus DNA B, complete sequence'
DNA-B	'NC_004662.1 Sida yellow vein virus DNA B, complete sequence'
DNA-B	'NC_007338.1 Squash leaf curl China virus - [B] DNA B, complete sequence'
DNA-B	'NC_004646.1 Squash mild leaf curl virus-[Imperial Valley] DNA B, complete sequence'
DNA-B	'NC_003862.1 Sri Lankan cassava mosaic virus-[Colombo] DNA-B, complete genome, isolate SLCMV-Col'
DNA-B	'NC_008057.1 Tomato golden mottle virus DNA B, complete sequence'
DNA-B	'NC_004612.1 Tomato leaf curl New Delhi virus DNA B, complete sequence'
DNA-B	'NC_003868.1 Tomato mosaic Havana virus DNA B, complete sequence'
DNA-B	'NC_001917.1 Tomato mottle Taino virus DNA B, complete sequence'
DNA-B	'NC_005331.1 Sida micrantha mosaic virus segment B, complete sequence'
DNA-B	'NC_005851.1 Tomato mosaic leaf curl virus DNA B, complete genome'
DNA-B	'NC_005853.2 Tomato yellow margin leaf curl virus segment DNA B, complete sequence'
DNA-B	'NC_005636.1 Horsegram yellow mosaic virus DNA B, complete genome'
DNA-B	'NC_005811.1 Tomato yellow leaf curl Kanchanaburi virus DNA B, complete sequence'
DNA-B	'NC_005846.1 Squash leaf curl Philippines virus segment B, complete genome'
DNA-B	'NC_008284.1 Pepper yellow leaf curl Indonesia virus DNA-B, complete genome'
DNA-B	'NC_006359.1 Corchorus yellow vein virus - [Hoa Binh] DNA B, complete genome'
DNA-B	'NC_038806.1 Tomato golden vein virus isolate DF[BR:Pip1799:03] segment DNA-B, complete sequence'
DNA-B	'NC_014067.1 Okra yellow mosaic Mexico virus DNA B, complete genome'
DNA-B	'NC_024779.1 Dolichos yellow mosaic virus isolate DA segment DNA B, complete sequence'
DNA-B	'NC_035888.1 Tobacco leaf curl Cuba virus isolate CU/frijol 8/2014 segment DNA-B, complete sequence'
DNA-B	'NC_038793.1 Cabbage leaf curl Jamaica virus clone 1966 Cu3-B6 segment DNA-B, complete sequence'
DNA-B	'NC_008495.1 Desmodium leaf distortion virus segment DNA-B, complete sequence'
DNA-B	'NC_007727.1 Tomato yellow spot virus DNA-B, complete genome'
DNA-B	'NC_008056.1 Sida mosaic Sinaloa virus DNA B, complete sequence'
DNA-B	'NC_038799.1 Malvastrum yellow mosaic Jamaica virus isolate Ma9bB6 segment DNA-B, complete sequence'
DNA-B	'NC_009646.1 Corchorus golden mosaic virus DNA-B, complete sequence'
DNA-B	'NC_009647.1 Kudzu mosaic virus DNA-B, complete sequence'
DNA-B	'NC_010714.1 Clerodendrum golden mosaic virus DNA-B, complete sequence'
DNA-B	'NC_011584.1 East African cassava mosaic Kenya virus DNA B, complete genome'
DNA-B	'NC_008493.1 Corchorus yellow spot virus DNA B, complete sequence'
DNA-B	'NC_008780.1 Sida yellow mosaic Yucatan virus DNA B, complete sequence'
DNA-B	'NC_012482.1 Rhynchosia golden mosaic Yucatan virus DNA B, complete genome'
DNA-B	'NC_010792.1 Ramie mosaic virus DNA-B, complete genome'
DNA-B	'NC_012120.1 Gossypium punctatum mild leaf curl virus DNA B, complete genome'
DNA-B	'NC_010839.1 Tomato leaf curl Palampur virus DNA B, complete sequence'
DNA-B	'NC_038886.1 Rhynchosia yellow mosaic virus, segment DNA-B, complete genome'
DNA-B	'NC_010838.1 Blainvillea yellow spot virus DNA-B, complete genome'
DNA-B	'NC_010836.1 Tomato common mosaic virus DNA-B, complete genome'
DNA-B	'NC_010834.1 Tomato mild mosaic virus DNA-B, complete genome'
DNA-B	'NC_011347.1 Clerodendrum golden mosaic China virus DNA B, complete genome'
DNA-B	'NC_015628.1 Tobacco yellow crinkle virus DNA B, complete genome'
DNA-B	'NC_012554.2 Euphorbia yellow mosaic virus DNA B, complete genome'
DNA-B	'NC_011182.1 Okra mottle virus - [Brazil:okra] DNA B, complete sequence'
DNA-B	'NC_012787.1 Passionfruit severe leaf distortion virus DNA-B, complete genome'
DNA-B	'NC_017913.1 Tomato yellow leaf distortion virus clone EF5N segment DNA-B, complete sequence'
DNA-B	'NC_014139.1 Abutilon Brazil virus DNA B segment, complete sequence'
DNA-B	'NC_016572.1 Cleome leaf crumple virus DNA-B, complete genome'
DNA-B	'NC_013415.1 Velvet bean severe mosaic virus DNA B, complete genome'
DNA-B	'NC_015489.1 Rhynchosai mild mosaic virus DNA B, complete genome'
DNA-B	'NC_015491.1 Merremia mosaic Puerto Rico virus DNA B, complete genome'
DNA-B	'NC_014128.1 Sida golden mottle virus DNA-B, complete genome'
DNA-B	'NC_014142.1 Soybean chlorotic blotch virus DNA B, complete genome'
DNA-B	'NC_014447.1 Sida golden mosaic Florida virus-Malvastrum DNA-B, complete genome'
DNA-B	'NC_038801.1 Rhynchosia golden mosaic Havana virus-[Cuba:Havana:28:2007] segment DNA-B, complete sequence'
DNA-B	'NC_038804.1 Rhynchosia rugose golden mosaic virus-[Cuba:Camaguey:171:2009] segment DNA-B, complete sequence'
DNA-B	'NC_014799.1 Sida golden yellow vein virus-[Jamaica:Liguanea2:2008] DNA-B, complete genome'
DNA-B	'NC_014795.1 Sida golden mosaic Buckup virus-[Jamaica:St. Elizabeth:2004] DNA-B, complete genome'
DNA-B	'NC_015044.1 Sida mosaic Bolivia virus 1 DNA-B, complete genome'
DNA-B	'NC_015047.1 Sida mosaic Bolivia virus 2 DNA-B, complete genome'
DNA-B	'NC_015048.1 Abutilon mosaic Bolivia virus DNA-B, complete genome'
DNA-B	'NC_024305.1 Solanum mosaic Bolivia virus segment DNA-B, complete sequence'
DNA-B	'NC_014903.1 Rhynchosia yellow mosaic India virus DNA-B, complete genome'
betasatellite	'NC_005046.1 Ageratum leaf curl disease associated sequence virion, complete genome'
betasatellite	'NC_005049.1 Tobacco leaf curl disease associated sequence virion, complete genome'
betasatellite	'NC_005051.1 Okra yellow vein disease associated sequence virion, complete genome'
betasatellite	'NC_003405.1 Bhendi yellow vein mosaic virus-associated DNA beta, complete genome'
betasatellite	'NC_005874.1 Zinnia leaf curl virus-associated DNA beta, complete genome'
betasatellite	'NC_005875.1 Cucurbita yellow vein virus-associated DNA beta, complete genome'
betasatellite	'NC_004733.1 Malvastrum yellow vein virus satellite DNA beta, complete genome'
betasatellite	'NC_005052.1 Honeysuckle yellow vein mosaic virus satellite DNA beta, complete genome'
betasatellite	'NC_004904.1 Tomato begomovirus satellite DNA beta, complete genome'
betasatellite	'NC_005497.1 Tomato leaf curl Java virus-[Ageratum] satellite DNA, complete genome'
betasatellite	'NC_006267.1 Sida yellow mosaic virus-[China]-associated DNA beta DNA beta, complete sequence'
betasatellite	'NC_007219.1 Cotton leaf curl Bangalore virus-associated DNA beta, complete genome'
betasatellite	'NC_007067.1 Ageratum yellow vein China virus-associated DNA beta, complete genome'
betasatellite	'NC_007639.1 Sida leaf curl virus-associated DNA beta, complete genome'
betasatellite	'NC_009903.1 Mesta yellow vein mosaic virus-associated DNA beta, complete genome'
betasatellite	'NC_006632.1 Malvastrum yellow vein Yunnan virus satellite DNA beta, complete genome'
betasatellite	'NC_008237.1 Siegesbeckia yellow vein virus-[GD13]-associated DNA beta, complete genome'
betasatellite	'NC_008579.1 Croton yellow vein mosaic virus-associated DNA beta betaC1 gene'
betasatellite	'NC_009449.1 Honeysuckle yellow vein beta-[Japan:Fukui:2001], complete genome'
betasatellite	'NC_010235.1 Pepper leaf curl virus satellite DNA beta, complete genome'
betasatellite	'NC_010236.1 Tomato leaf curl Joydebpur virus satellite DNA beta, complete genome'
betasatellite	'NC_010328.1 Malachra yellow vein mosaic virus-associated satellite DNA beta, complete genome'
betasatellite	'NC_010619.1 Pepper leaf curl Yunnan virus satellite DNA beta, complete genome'
betasatellite	'NC_012493.1 Tomato leaf curl Patna betasatellite, complete genome'
betasatellite	'NC_038891.1 Tobacco leaf curl betasatellite-[Pakistan:Multan:Pedilanthus:2004] C1 gene, clone ptvbeta'
betasatellite	'NC_012666.1 Emilia yellow vein virus-associated DNA beta, complete genome'
betasatellite	'NC_010239.1 Radish leaf curl virus satellite DNA beta, complete genome'
betasatellite	'NC_013423.1 Vernonia yellow vein betasatellite, complete genome'
betasatellite	'NC_014594.1 Tomato leaf curl Bangladesh betasatellite, complete genome'
betasatellite	'NC_014846.1 Bhendi yellow vein India betasatellite [India:Aurangabad:OY164:2006], complete genome'
betasatellite	'NC_014895.1 Bhendi yellow vein mosaic betasatellite [India:Coimbator:OYCO1:2005], complete genome'
betasatellite	'NC_014896.1 Okra enation leaf curl betasatellite [India:Sonipat:EL10:2006], complete genome'
betasatellite	'NC_014746.1 Ageratum leaf curl Buea betasatellite, complete genome'
betasatellite	'NC_020889.1 Ageratum leaf curl betasatellite isolate Sikar M 2, complete sequence'
betasatellite	'NC_018864.1 Tomato leaf curl Yemen betasatellite, complete genome'
betasatellite	'NC_018935.1 Tobacco leaf chlorosis betasatellite isolate 03, complete sequence'
betasatellite	'NC_020475.1 Corchorus yellow vein mosaic betasatellite clone CBA7, complete sequence'
betasatellite	'NC_023015.1 Hedyotis uncinella yellow mosaic betasatellite isolate VN1, complete genome'
betasatellite	'NC_024490.1 Mirabilis leaf curl India virus associated betasatellite complete sequence, isolate Pragpur'
alphasatellite	'NC_033555.1 Ageratum yellow vein alphasatellite clone N36-24, complete sequence'
alphasatellite	'NC_005954.1 Okra leaf curl alphasatellite rep gene for replication associated protein, clone NOB-3'
alphasatellite	'NC_039083.1 Bendhi Yellow Vein Mosaic/Mesta Yellow Vein Mosaic alphasatellite, complete sequence, clone 10a1-RCA-aI-F'
alphasatellite	'NC_014744.1 Ageratum leaf curl Cameroon alphasatellite, complete genome'
alphasatellite	'NC_014747.1 Tomato leaf curl Cameroon alphasatellite, complete genome'
alphasatellite	'NC_014597.1 Tobacco leaf curl PUSA alphasatellite, complete genome'
alphasatellite	'NC_015631.1 Verbesina encelioides leaf curl alphasatellite, complete genome'
alphasatellite	'NC_025244.1 Synedrella leaf curl alphasatellite isolate Synd-1, complete sequence'
alphasatellite	'NC_029907.1 Cucurbit yellow mosaic alphasatellite isolate 51SA, complete sequence'
alphasatellite	'NC_029313.1 Bhindi yellow vein alphasatellite replication protein gene, complete cds'

## Sheet: Sheet3
monopartite	'NC_004626.1 Ageratum yellow vein virus, complete genome'
monopartite	'NC_031760.1 Cotton leaf curl virus isolate Faz-14, complete genome'
monopartite	'NC_029994.1 Tobacco leaf curl virus isolate KH6, complete genome'
monopartite	'NC_013017.1 Okra leaf curl virus-[Cameroon], complete genome'
monopartite	'NC_004627.1 Ageratum yellow vein Taiwan virus, complete genome'
monopartite	'NC_004607.1 Cotton leaf curl Multan virus, complete genome'
monopartite	'NC_043418.1 Eupatorium yellow vein virus-[MNS2] complete genome, isolate Fukuoka-MNS2'
monopartite	'NC_004641.1 Tobacco leaf curl Kochi virus, complete genome'
monopartite	'NC_005635.1 Horsegram yellow mosaic virus, complete genome'
monopartite	'NC_043119.1 Eupatorium yellow vein virus - [Yamaguchi] DNA, complete genome'
monopartite	'NC_006876.1 Tomato leaf curl Mayotte virus, complete genome'
monopartite	'NC_043120.1 Eupatorium yellow vein virus-[Suya] DNA, complete genome, isolate: Suya-2003'
monopartite	'NC_013467.1 Sweet potato leaf curl Lanzarote virus, complete genome'
monopartite	'NC_012118.1 Pedilanthus leaf curl virus-Pedilanthus [Pakistan:Multan:2004], complete genome'
monopartite	'NC_012137.1 Cotton leaf curl Burewala virus - [India:Vehari:2004], complete genome'
monopartite	'NC_011052.2 Sweet potato leaf curl Spain virus, complete genome'
monopartite	'NC_013022.2 Ipomoea yellow vein virus, complete genome'
monopartite	'NC_013102.1 Tomato leaf curl Hainan virus, complete genome'
monopartite	'NC_014473.1 Croton yellow vein virus, complete genome'
monopartite	'NC_029648.1 Cotton leaf curl Shadadpur virus, complete genome, isolate Sha'
monopartite	'NC_015324.1 Sweet potato golden vein associated virus, complete genome'
monopartite	'NC_013639.1 Tomato leaf curl Cameroon virus - [Cameroon:Buea:Okra:2008], complete genome'
monopartite	'NC_014140.1 Soybean mild mottle virus, complete genome'
monopartite	'NC_028114.1 Tomato leaf curl Comoros virus complete genome, isolate Mayote:Dembeni:2003'
monopartite	'NC_043531.1 Datura leaf curl virus isolate Sudan-Datura 435-2016, complete genome'
monopartite	'NC_028124.1 Vinca leaf curl virus isolate RK, complete sequence'
monopartite	'NC_028985.1 Okra leaf curl Oman virus, complete genome, isolate OK-2'
monopartite	'NC_021202.1 Ageratum Yellow vein China virus - OX1, complete genome'
monopartite	'NC_021205.1 Tomato leaf curl China virus - OX2, complete genome'
monopartite	'NC_022229.1 Tomato yellow leaf curl Saudi virus isolate Hail1, complete genome'
monopartite	'NC_022232.1 Sweet potato leaf curl Shanghai virus isolate China:Jilin1:2012, complete genome'
monopartite	'NC_024116.1 Tomato leaf curl Barka virus isolate Tom-55, complete genome'
monopartite	'NC_025725.1 Jatropha leaf crumple virus isolate SKJ1, complete genome'
monopartite	'NC_028046.1 Chilli leaf curl Ahmedabad virus-India [India/Ahmedabad/2014], complete genome'
monopartite	'NC_028262.1 Andrographis yellow vein leaf curl virus isolate A-64, complete genome'
monopartite	'NC_031306.1 Synedrella leaf curl virus isolate YN3306, complete genome'
monopartite	'NC_038991.1 Sida bright yellow mosaic virus isolate BR:Tac720:10, complete sequence'
monopartite	'NC_035481.1 Tomato leaf curl purple vein virus isolate BR:793:15 clone P793, complete genome'
monopartite	'NC_043433.1 Sweet potato golden vein Korea virus isolate 102_SPGVaV, complete genome'
monopartite	'NC_043121.1 Eupatorium yellow vein virus-[Japan: Kagawa: Tomato: 1997] DNA, complete genome'
monopartite	'NC_000882.1 Pepper leaf curl virus, complete genome'
monopartite	'NC_002510.1 Cotton leaf curl Gezira virus, complete genome'
monopartite	'NC_002817.1 Tobacco leaf curl Zimbabwe virus, complete genome'
monopartite	'NC_003357.1 Soybean crinkle leaf virus, complete genome'
monopartite	'NC_003418.1 Bhendi yellow vein mosaic virus, complete genome'
monopartite	'NC_003434.1 Ageratum enation virus, complete genome'
monopartite	'NC_003556.1 Eupatorium yellow vein virus, complete genome'
monopartite	'NC_003609.1 Honeysuckle yellow vein mosaic virus, complete genome'
monopartite	'NC_003722.1 Tobacco curly shoot virus, complete genome'
monopartite	'NC_003828.1 Tomato yellow leaf curl Sardinia virus, complete genome'
monopartite	'NC_003891.1 Tomato leaf curl Bangalore virus, complete genome'
monopartite	'NC_003896.1 Tomato leaf curl virus, complete genome'
monopartite	'NC_003897.1 Tomato leaf curl Karnataka virus, complete genome'
monopartite	'NC_003898.1 Tomato leaf curl Taiwan virus, complete genome'
monopartite	'NC_004005.1 Tomato yellow leaf curl virus, complete genome'
monopartite	'NC_004044.1 Tomato yellow leaf curl China virus, complete genome'
monopartite	'NC_004071.1 Hollyhock leaf crumple virus, complete genome'
monopartite	'NC_004090.1 Ageratum yellow vein China virus-[Hn2] complete genome, isolate Hn2'
monopartite	'NC_004091.1 Stachytarpheta leaf curl virus, complete genome'
monopartite	'NC_004147.1 Papaya leaf curl virus, complete genome'
monopartite	'NC_004300.1 Croton yellow vein mosaic virus, complete genome'
monopartite	'NC_004356.1 Tobacco leaf curl Yunnan virus - [Y136], complete genome'
monopartite	'NC_004569.1 Tomato yellow leaf curl Malaga virus, complete genome'
monopartite	'NC_004582.1 Cotton leaf curl Alabad virus, complete genome'
monopartite	'NC_004583.1 Cotton leaf curl Kokhran virus, complete genome'
monopartite	'NC_004614.1 Tomato leaf curl Bangladesh virus, complete genome'
monopartite	'NC_004613.1 Tomato leaf curl Laos virus, complete genome'
monopartite	'NC_004618.1 Chayote yellow mosaic virus, complete genome'
monopartite	'NC_004628.1 Chilli leaf curl virus, complete genome'
monopartite	'NC_004634.1 Malvastrum yellow vein virus, complete genome'
monopartite	'NC_004642.1 Tomato severe leaf curl virus, complete genome'
monopartite	'NC_004637.1 Sida mottle virus, complete genome'
monopartite	'NC_004639.1 Sida yellow mosaic virus, complete genome'
monopartite	'NC_004640.1 Sweet potato leaf curl Georgia virus, complete genome'
monopartite	'NC_004651.1 Squash leaf curl Yunnan virus, complete genome'
monopartite	'NC_004648.1 Tomato leaf curl Malaysia virus, complete genome'
monopartite	'NC_004647.1 Tomato leaf curl Sri Lanka virus, complete genome'
monopartite	'NC_004654.1 Tobacco leaf curl Japan virus, complete genome'
monopartite	'NC_004673.1 Okra yellow vein mosaic virus, complete genome'
monopartite	'NC_004675.1 Tomato curly stunt virus, complete genome'
monopartite	'NC_005031.1 Tomato leaf curl Java virus, complete genome'
monopartite	'NC_005032.1 Tomato leaf curl Philippines virus, complete genome'
monopartite	'NC_005321.1 Papaya leaf curl China virus - [G8], complete genome'
monopartite	'NC_005320.1 Tomato leaf curl China virus - [G32], complete sequence'
monopartite	'NC_005347.1 Pepper yellow vein Mali virus, complete genome'
monopartite	'NC_005348.1 Tomato leaf curl Mali virus, complete genome'
monopartite	'NC_005807.1 Honeysuckle yellow vein virus-[UK1], complete genome'
monopartite	'NC_005842.1 Tomato leaf curl Iran virus, complete genome'
monopartite	'NC_005855.1 Tomato leaf curl Sudan virus - [Gezira], complete genome'
monopartite	'NC_006384.1 Ageratum leaf curl virus - [G52], complete genome'
monopartite	'NC_006631.1 Malvastrum yellow vein Yunnan virus, complete genome'
monopartite	'NC_006874.1 Tomato leaf curl Madagascar virus-Menabe [Madagascar:Morondova:2001], complete genome'
monopartite	'NC_006995.1 Senecio yellow mosaic virus, complete genome'
monopartite	'NC_007638.1 Sida leaf curl virus, complete genome'
monopartite	'NC_007724.1 Malvastrum leaf curl virus - [G87], complete genome'
monopartite	'NC_008236.1 Siegesbeckia yellow vein virus-[GD13], complete genome'
monopartite	'NC_008267.1 Tomato yellow leaf curl Indonesia virus-[Lembang], complete genome'
monopartite	'NC_008316.1 Malvastrum leaf curl Guangdong virus, complete genome'
monopartite	'NC_008317.1 Siegesbeckia yellow vein Guangxi virus, complete genome'
monopartite	'NC_008329.1 Tomato leaf curl Guangxi virus, complete genome'
monopartite	'NC_008517.1 Tomato leaf curl Pune virus, complete genome'
monopartite	'NC_008793.1 Honeysuckle yellow vein mosaic virus-[Kagoshima], complete genome'
monopartite	'NC_008794.1 Crassocephalum yellow vein virus - Jinghong, complete genome'
monopartite	'NC_009031.1 Tomato leaf curl Seychelles virus, complete genome'
monopartite	'NC_009354.1 Sida yellow vein Madurai virus, complete genome'
monopartite	'NC_009451.1 Clerodendron yellow mosaic virus, complete genome'
monopartite	'NC_009553.1 Tobacco leaf curl Thailand virus, complete genome'
monopartite	'NC_010307.1 Emilia yellow vein virus-[Fz1], complete genome'
monopartite	'NC_010618.1 Pepper leaf curl Yunnan virus-[YN323], complete sequence'
monopartite	'NC_011024.1 TYLCAxV-Sic1-[IT:Sic2/2:04], complete genome'
monopartite	'NC_011135.1 Tomato leaf curl Kerala virus, complete genome'
monopartite	'NC_012206.1 Tomato leaf curl Nigeria virus-[Nigeria:2006], complete genome'
monopartite	'NC_013465.1 Sweet potato leaf curl Canary virus, complete genome'
monopartite	'NC_014542.1 Tomato leaf curl Oman virus, complete genome'
monopartite	'NC_014647.1 Malvastrum yellow vein Changa Manga virus, complete genome'
monopartite	'NC_014645.1 Ageratum leaf curl Cameroon virus, complete genome'
monopartite	'NC_014745.1 Okra leaf curl Cameroon virus, complete genome'
monopartite	'NC_014968.1 Sweet potato leaf curl Uganda virus-[Uganda:Kampala:2008], complete genome'
monopartite	'NC_015124.1 Tomato leaf curl Hanoi virus, complete genome'
monopartite	'NC_015317.1 Sweet potato leaf curl South Carolina virus, complete genome'
monopartite	'NC_016649.1 Hollyhock yellow vein mosaic virus, complete genome'
monopartite	'NC_017987.1 Sida yellow mosaic China virus - [Hainan 8] complete genome, isolate Hn7'
monopartite	'NC_020236.1 Pepper yellow leaf curl virus isolate YN65-1, complete genome'
monopartite	'NC_020473.1 Corchorus yellow vein mosaic virus isolate CEA8, complete genome'
monopartite	'NC_016660.1 Eclipta yellow vein virus clone EcYVV-[PK,Fai,06], complete genome'
monopartite	'NC_021719.1 Sweet potato leaf curl Henan virus isolate China:Henan10:2012, complete genome'
monopartite	'NC_022586.1 Sweet potato leaf curl Sichuan virus 2 isolate China:Sichuan14:2012, complete genome'
monopartite	'NC_023023.1 Spinach yellow vein Sikar virus clone AS22, complete genome'
monopartite	'NC_023312.1 Tomato leaf curl Liwa virus isolate LW1, complete genome'
monopartite	'NC_024491.1 Mirabilis leaf curl virus, complete sequence, isolate Pragpur'
monopartite	'NC_024687.1 Rose leaf curl virus isolate AS24, complete genome'
monopartite	'NC_024693.1 Sweet potato leaf curl Guangxi virus isolate China:Guangxi5:2011, complete genome'
monopartite	'NC_025680.1 Tomato yellow leaf curl Axarquia virus isolate Homra, complete genome'
monopartite	'NC_025681.1 Sweet potato leaf curl Sao Paulo virus isolate SPLCSPV-[BR:AlvM:09], complete genome'
monopartite	'NC_025964.1 Catharanthus yellow mosaic virus complete genome, isolate DR-151'
monopartite	'NC_027129.1 Hollyhock yellow vein mosaic Islamabad virus complete genome, isolate 3AK'
monopartite	'NC_027215.1 Tomato yellow leaf curl Mali virus complete genome, isolate Tom-141'
monopartite	'NC_029995.1 Tomato yellow leaf curl Shuangbai virus - [Y4536], complete genome'
monopartite	'NC_030748.1 Senna leaf curl virus isolate Mohali, complete genome'
monopartite	'NC_031466.1 Lisianthus enation leaf curl virus DNA, complete genome, isolate: BG-1'
monopartite	'NC_032118.1 Vernonia crinkle virus isolate UG7, complete sequence'
monopartite	'NC_033334.1 Sweet potato mosaic virus isolate KT10BII, complete genome'
monopartite	'NC_033779.1 Tomato leaf curl Burkina Faso virus isolate Burkina Faso:Loumbila:Tomate51B1:2013, complete genome'
monopartite	'NC_038440.1 Chenopodium leaf curl virus, complete genome'
monopartite	'NC_038458.1 Sida golden mosaic Braco virus-[Jamaica:Liguanea:2008] clone pBrA4, complete genome'
monopartite	'NC_038460.1 Sida golden yellow vein virus-[A11], complete genome'
monopartite	'NC_038465.1 Sweet potato leaf curl Sichuan virus 1 isolate China:Sichuan15:2012, complete genome'
monopartite	'NC_038466.1 Sweet potato mosaic virus - [Brazil:Brasilia1:2007] isolate BR:BSB1, complete genome'
monopartite	'NC_038470.1 Tomato leaf curl New Delhi virus 2, complete genome'
monopartite	'NC_038879.1 Eupatorium yellow vein virus-[SOJ3] complete genome, isolate Fukuoka-SOJ3'
monopartite	'NC_038881.1 Euphorbia leaf curl Guangxi virus complete genome, isolate G35-1'
monopartite	'NC_038884.1 Hollyhock leaf curl virus, complete genome, isolate [Pakistan:20-4:06] Faisalabad3'
monopartite	'NC_038894.1 Tomato leaf curl Anjouan virus, isolate Comoros:Ouani:2004'
monopartite	'NC_038899.1 Tomato leaf curl Namakely virus, isolate Madagascar:Namakely:2001'
monopartite	'NC_038962.1 Jatropha leaf curl Gujarat virus, complete genome'
monopartite	'NC_038963.1 Tomato latent virus isolate T2+, complete genome'
monopartite	'NC_038972.1 VEM begomovirus 7 isolate Sp5-4, complete sequence'
monopartite	'NC_038976.1 Euphorbia yellow leaf curl virus isolate PK1A, complete genome'
monopartite	'NC_038985.1 Velvet bean golden mosaic virus isolate bgv6-5, complete genome'
monopartite	'NC_038990.1 Sida chlorotic mottle virus isolate BR:Trm531.1:10, complete sequence'
monopartite	'NC_038992.1 Sida golden yellow spot virus isolate BR:Sab889:10, complete sequence'
bipartite	>NC_002981.1 Ageratum yellow vein Sri Lanka virus segment A, complete genome
bipartite	>NC_003867.1 Tomato mosaic Havana virus-[Quivican] DNA, segment A
bipartite	>NC_004153.1 Tomato leaf curl Vietnam virus DNA A, complete genome
bipartite	>NC_004192.1 Pepper leaf curl Bangladesh virus segment A component, complete genome
bipartite	>NC_004650.1 Sweet potato leaf curl virus DNA A, complete sequence
bipartite	>NC_005319.1 Euphorbia leaf curl virus DNA A, complete sequence
bipartite	>NC_005843.1 Tomato chino La Paz virus segment A, complete genome
bipartite	>NC_005844.1 Papaya leaf curl Guandong virus - [GD2] DNA A, complete sequence
bipartite	>NC_007211.1 Alternanthera yellow vein virus DNA-A, complete genome
bipartite	>NC_007290.1 Cotton leaf curl Bangalore virus segment A, complete genome
bipartite	>NC_007339.1 Squash leaf curl China virus - [B] DNA-A, complete genome
bipartite	>NC_007210.2 Ludwigia yellow vein virus DNA-A, complete genome
bipartite	>NC_007723.1 Tomato leaf curl Joydebpur virus DNA-A, complete genome
bipartite	>NC_008304.1 Euphorbia mosaic virus - A [Mexico:Yucatan:2004] clone pEuMV-YP-A segment DNA-A, complete sequence
bipartite	>NC_008374.1 Tomato yellow leaf curl Guangdong virus DNA A, complete sequence
bipartite	>NC_008373.1 Tomato leaf curl Guangdong virus DNA-A, complete sequence
bipartite	>NC_008377.1 Okra yellow crinkle virus segment A, complete sequence
bipartite	>NC_008559.1 Malvastrum yellow mosaic virus DNA-A, complete genome
bipartite	>NC_009030.1 Tomato leaf curl Arusha virus DNA-A, complete sequence
bipartite	>NC_009088.1 Mesta yellow vein mosaic virus DNA-A, complete sequence
bipartite	>NC_009550.1 Lindernia anagallis yellow vein virus DNA-A, complete sequence
bipartite	>NC_009545.1 Spilanthes yellow vein virus DNA-A, complete sequence
bipartite	>NC_009546.1 Mimosa yellow leaf curl virus DNA-A, complete sequence
bipartite	>NC_009547.1 Sida yellow vein Vietnam virus DNA-A, complete sequence
bipartite	>NC_009548.1 Tomato yellow leaf curl Vietnam virus DNA-A, complete sequence
bipartite	>NC_009549.1 Erectites yellow mosaic virus DNA-A, complete sequence
bipartite	>NC_010238.1 Radish leaf curl virus segment A, complete sequence
bipartite	>NC_010313.1 Tomato leaf curl Ghana virus segment A, complete genome
bipartite	>NC_010435.1 Kenaf leaf curl virus DNA A, complete sequence
bipartite	>NC_010439.1 Tomato leaf curl Cebu virus DNA-A, complete genome
bipartite	>NC_010440.1 Tomato leaf curl Mindanao virus DNA-A, complete genome
bipartite	>NC_010812.1 Ageratum yellow vein Hualian virus-[Taiwan:Hsinchu:tom:2003] DNA A, complete sequence
bipartite	>NC_010818.1 Mesta yellow vein mosaic Bahraich virus-[India:Bahraich:2007] DNA A, complete sequence
bipartite	>NC_010946.1 Pumpkin yellow mosaic Malaysia virus DNA A, complete sequence
bipartite	>NC_010947.1 Allamanda leaf curl virus DNA-A, complete genome
bipartite	>NC_011096.1 Tomato leaf curl Kumasi virus segment A, complete sequence
bipartite	>NC_011804.1 Gossypium darwinii symptomless virus DNA-A, complete genome
bipartite	>NC_012041.1 Bhendi yellow vein Bhubhaneswar virus DNA-A, complete genome
bipartite	>NC_012492.1 Tomato leaf curl Patna virus DNA-A, complete genome
bipartite	>NC_012665.1 Malvastrum yellow vein Baoshan virus DNA-A, complete genome
bipartite	>NC_013019.1 Sunn hemp leaf distortion virus DNA-A, complete genome
bipartite	>NC_013413.1 Tomato leaf curl Sulawesi virus DNA-A, complete genome
bipartite	>NC_007730.2 Vernonia yellow vein virus DNA-A, complete genome
bipartite	>NC_014510.2 Tomato leaf deformation virus DNA-A, complete genome
bipartite	>NC_014596.1 Tobacco leaf curl Pusa virus DNA-A, complete genome
bipartite	>NC_014707.1 Papaya leaf crumple virus-Panipat 8 [India:Panipat:Papaya:2008] DNA-A, complete genome
bipartite	>NC_014845.1 Bhendi yellow vein India virus [India:Dharwad OYDWR2:2006] DNA-A, complete genome
bipartite	>NC_014894.1 Okra enation leaf curl virus [India:Munthal EL37:2006] DNA-A, complete genome
bipartite	>NC_015397.1 Cleome golden mosaic virus DNA-A, complete genome
bipartite	>NC_015487.1 Bean yellow mosaic Mexico virus DNA-A, complete genome
bipartite	>NC_016984.1 Pepper leaf curl Lahore Virus-[Pakistan:Lahore1:2004] segment A, complete genome
bipartite	>NC_016998.1 Centrosema yellow spot virus DNA-A, complete genome
bipartite	>NC_016999.1 Macroptilium yellow spot virus DNA A, complete sequence
bipartite	>NC_017000.1 Macroptilium yellow vein virus DNA-A, complete genome
bipartite	>NC_018090.1 French bean leaf curl virus isolate FbLCV-Kanpur segment DNA-A, complete sequence
bipartite	>NC_019034.1 Jatropha mosaic Nigerian virus isolate 2 segment DNA-A, complete sequence
bipartite	>NC_020253.1 Sida yellow net virus isolate BR:Vic2:10 segment DNA-A, complete sequence
bipartite	>NC_020254.1 Sida yellow blotch virus isolate BR:Rla1:10 segment DNA-A, complete sequence
bipartite	>NC_020255.1 Sida yellow mosaic Alagoas virus isolate BR:Vsa3:10 segment DNA-A, complete sequence
bipartite	>NC_020256.1 Sida mottle Alagoas virus isolate BR:Vsa2:10 segment DNA-A, complete sequence
bipartite	>NC_021245.1 Malvastrum leaf curl Philippines virus isolate Mc1 segment DNA-A, complete sequence
bipartite	>NC_021341.1 Tomato yellow leaf curl Yunnan virus isolate YN2013 clone 10 segment DNA-A, complete sequence
bipartite	>NC_021579.1 Tomato golden leaf spot virus isolate TO83 Araguaina segment DNA-A, complete sequence
bipartite	>NC_022005.1 Bean white chlorosis mosaic virus isolate Venezuela:Rubio 932:2007 segment DNA-A, complete sequence
bipartite	>NC_022073.1 Hemidesmus yellow mosaic virus clone H1 segment DNA-A, complete sequence
bipartite	>NC_023849.1 Pouzolzia golden mosaic virus isolate TY01 segment DNA-A, complete sequence
bipartite	>NC_026253.1 Oxalis yellow vein virus strain USA:LA:01 segment DNA-A, complete sequence
bipartite	>NC_026761.1 Tomato enation leaf curl virus isolate TC14 segment DNA-A, complete sequence
bipartite	>NC_026763.1 Malvastrum yellow vein Cambodia virus isolate 08 segment DNA-A, complete sequence
bipartite	>NC_030403.1 Telfairia golden mosaic virus isolate Cameroon-Bakundu Bangang-Telfairia-20-14 segment DNA-A, complete sequence
bipartite	>NC_030699.1 Ramie mosaic Yunnan virus isolate 4819-5 segment DNA-A, complete sequence
bipartite	>NC_030749.1 Malvastrum yellow vein Honghe virus segment DNA-A, complete sequence, isolate Y249
bipartite	>NC_031451.1 Wissadula yellow mosaic virus isolate ALW35_5B segment DNA-A, complete sequence
bipartite	>NC_031452.1 Macroptilium bright mosaic virus isolate ALM33_5B segment DNA-A, complete sequence
bipartite	>NC_031754.1 Okra enation leaf curl virus isolate Trincomalee segment DNA-A, complete sequence
bipartite	>NC_032006.1 Tomato mottle leaf curl virus isolate BR-PB44-14 segment DNA-A, complete sequence
bipartite	>NC_033554.1 Pea leaf distortion virus clone N36-41 segment DNA-A, complete sequence
bipartite	>NC_011309.2 Jatropha yellow mosaic virus segment DNA-A, complete sequence
bipartite	>NC_038438.1 Abutilon golden mosaic Yucatan virus isolate Conkal-2007 segment A, complete sequence
bipartite	>NC_038439.1 Boerhavia yellow spot virus isolate Yucatan segment DNA A, complete sequence
bipartite	>NC_038441.1 Chilli leaf curl Kanpur virus [India/Kanpur/2008] clone pChKanB19 segment DNA-A, complete sequence
bipartite	>NC_038442.1 Chilli Leaf curl Vellanad virus [India/Vellanad/2008] clone pChVelK52 segment DNA-A, complete sequence
bipartite	>NC_038443.1 Chino del tomate Amazonas virus isolate AM10 segment DNA-A, complete sequence
bipartite	>NC_038444.1 Cotton leaf curl Gezira virus-[Cotton] A component, complete genome
bipartite	>NC_038445.1 Cowpea golden mosaic virus-[Nigeria] DNA-A, complete sequence
bipartite	>NC_038448.1 Hedyotis uncinella yellow mosaic virus isolate VN1 segment DNA-A, complete sequence
bipartite	>NC_038449.1 Jatropha mosaic India virus-[Lucknow] strain SK-2 segment DNA-A, complete sequence
bipartite	>NC_038450.1 Leonurus mosaic virus isolate PR 88 segment DNA-A, complete sequence
bipartite	>NC_038451.1 Ludwigia yellow vein Vietnam virus segment DNA-A, complete sequence
bipartite	>NC_038452.1 Malvastrum yellow mosaic Helshire virus isolate Ma179A5 segment DNA-A, complete sequence
bipartite	>NC_038453.1 Pouzolzia mosaic Guangdong virus isolate GD1 segment DNA-A, complete sequence
bipartite	>NC_038454.1 Premna leaf curl virus isolate VN7 segment DNA-A, complete sequence
bipartite	>NC_038455.1 Sauropus leaf curl virus isolate AFSP5e segment A, complete sequence
bipartite	>NC_038456.1 Sida ciliaris golden mosaic virus strain Venezuela:Lara:M3:2009 segment DNA-A, complete sequence
bipartite	>NC_038457.1 Sida common mosaic virus isolate BR:Coi4:07 segment DNA-A, complete sequence
bipartite	>NC_038459.1 Sida golden mosaic Lara virus strain Venezuela:Lara:M1:2009 segment DNA-A, complete sequence
bipartite	>NC_038461.1 Sida yellow leaf curl virus isolate BR:Coi3:07 segment DNA-A, complete sequence
bipartite	>NC_038462.1 Sidastrum golden leaf spot virus isolate DF334 segment DNA-A, complete sequence
bipartite	>NC_038463.1 Soybean blistering mosaic virus isolate NOA segment DNA-A, complete sequence
bipartite	>NC_038464.1 Sweet potato leaf curl China virus segment A, complete sequence
bipartite	>NC_038467.1 Tomato bright yellow mosaic virus isolate BA167 segment DNA-A, complete sequence
bipartite	>NC_038468.1 Tomato bright yellow mottle virus isolate TO167 segment DNA-A, complete sequence
bipartite	>NC_038469.1 Tomato interveinal chlorosis virus isolate PE[BR:Mdc2681:04] segment DNA-A, complete sequence
bipartite	>NC_038471.1 Tomato leaf curl New Delhi virus 4 isolate TC306 segment DNA-A, complete sequence
bipartite	>NC_038472.1 Tomato leaf curl Rajasthan virus - [India:Rajasthan:2005] segment A, complete sequence
bipartite	>NC_038473.1 Tomato leaf curl Uganda virus - [Iganga] segment A, complete sequence
bipartite	>NC_038474.1 Tomato leaf distortion virus isolate BR:Pda4:05 segment DNA-A, complete sequence
bipartite	>NC_038475.1 Vigna yellow mosaic virus isolate Yautepec-2007 segment A, complete sequence
bipartite	>NC_038476.1 Asystasia begomovirus 2 segment DNA-A, complete sequence
bipartite	>NC_038875.1 Chilli leaf curl India virus segment A, complete genome
bipartite	>NC_038876.1 Clerodendrum golden mosaic Jiangsu virus complete DNA-A genome, isolate YX2
bipartite	>NC_038890.1 Tobacco leaf rugose virus DNA-A, complete sequence
bipartite	>NC_038967.1 VEM begomovirus 1 isolate GtSq11 segment DNA-A, complete sequence
bipartite	>NC_038968.1 VEM begomovirus 2 isolate GtSq5 segment DNA-A, complete sequence
bipartite	>NC_038969.1 VEM begomovirus 3 isolate GtSq10 segment DNA-A, complete sequence
bipartite	>NC_038970.1 VEM begomovirus 4 isolate GtSq8 segment DNA-A, complete sequence
bipartite	>NC_038971.1 VEM begomovirus 6 isolate PR10-1 segment DNA-A, complete sequence
bipartite	>NC_038980.1 Duranta leaf curl virus isolate 57SA segment DNA-A, complete sequence
bipartite	>NC_038994.1 Synedrella yellow vein clearing virus isolate NCBS-PS-1 segment DNA-A, complete sequence
bipartite	>NC_039082.1 Euphorbia mosaic virus Peru DNA-A, complete genome
