# Supplementary material for: Classification of genomic components and prediction of genes of Begomovirus based on subsequence natural vector and support vector machine
Source: PeerJ. 2020 Aug 3;8:e9625. doi: 10.7717/peerj.9625 (PMC7409808; doi:10.7717/peerj.9625)
Supplement: Supplemental Information 2 [file peerj-08-9625-s002.xlsx]

## Sheet: Sheet1
begomovirus	'NC_016082.1 Sida yellow mottle virus strain Cuba:Sancti Spiritus159-1:2009 segment DNA-A, complete sequence'
begomovirus	'NC_009903.1 Mesta yellow vein mosaic virus-associated DNA beta, complete genome'
begomovirus	'NC_008780.1 Sida yellow mosaic Yucatan virus DNA B, complete sequence'
begomovirus	'NC_002555.1 Tomato rugose mosaic virus DNA A, complete sequence'
begomovirus	'NC_010440.1 Tomato leaf curl Mindanao virus DNA-A, complete genome'
begomovirus	'NC_017000.1 Macroptilium yellow vein virus DNA-A, complete genome'
begomovirus	'NC_010714.1 Clerodendrum golden mosaic virus DNA-B, complete sequence'
begomovirus	'NC_004675.1 Tomato curly stunt virus, complete genome'
begomovirus	'NC_014902.1 Rhynchosia yellow mosaic India virus DNA-A, complete genome'
begomovirus	'NC_001467.1 African cassava mosaic virus isolate West Kenyan 844 segment DNA1, complete sequence'
begomovirus	'NC_029907.1 Cucurbit yellow mosaic alphasatellite isolate 51SA, complete sequence'
begomovirus	'NC_015628.1 Tobacco yellow crinkle virus DNA B, complete genome'
begomovirus	'NC_007638.1 Sida leaf curl virus, complete genome'
begomovirus	'NC_004627.1 Ageratum yellow vein Taiwan virus, complete genome'
begomovirus	'NC_032006.1 Tomato mottle leaf curl virus isolate BR-PB44-14 segment DNA-A, complete sequence'
begomovirus	'NC_009031.1 Tomato leaf curl Seychelles virus, complete genome'
begomovirus	'NC_005330.1 Sida micrantha mosaic virus segment A, complete sequence'
begomovirus	'NC_038790.1 Bean golden yellow mosaic virus-[Dominican Republic] BR1 protein (BR1) and BL1 protein (BL1) genes, complete cds'
begomovirus	'NC_010840.1 Tomato leaf curl Palampur virus DNA A, complete sequence'
begomovirus	'NC_028124.1 Vinca leaf curl virus isolate RK, complete sequence'
begomovirus	'NC_004005.1 Tomato yellow leaf curl virus, complete genome'
begomovirus	'NC_040544.1 Tomato leaf curl Yunnan betasatellite strain China:Yunnan 2:Tomato:2015, complete sequence'
begomovirus	'NC_007211.1 Alternanthera yellow vein virus DNA-A, complete genome'
begomovirus	'NC_005843.1 Tomato chino La Paz virus segment A, complete genome'
begomovirus	'NC_020253.1 Sida yellow net virus isolate BR:Vic2:10 segment DNA-A, complete sequence'
begomovirus	'NC_005321.1 Papaya leaf curl China virus - [G8], complete genome'
begomovirus	'NC_014799.1 Sida golden yellow vein virus-[Jamaica:Liguanea2:2008] DNA-B, complete genome'
begomovirus	'NC_033334.1 Sweet potato mosaic virus isolate KT10BII, complete genome'
begomovirus	'NC_038967.1 VEM begomovirus 1 isolate GtSq11 segment DNA-A, complete sequence'
begomovirus	'NC_004656.2 East African cassava mosaic Zanzibar virus DNA B, complete sequence'
begomovirus	'NC_031453.1 Macroptilium common mosaic virus isolate BLM2_1S segment DNA-B, complete sequence'
begomovirus	'NC_038443.1 Chino del tomate Amazonas virus isolate AM10 segment DNA-A, complete sequence'
begomovirus	'NC_008304.1 Euphorbia mosaic virus - A [Mexico:Yucatan:2004] clone pEuMV-YP-A segment DNA-A, complete sequence'
begomovirus	'NC_008377.1 Okra yellow crinkle virus segment A, complete sequence'
begomovirus	'NC_005032.1 Tomato leaf curl Philippines virus, complete genome'
begomovirus	'NC_011182.1 Okra mottle virus - [Brazil:okra] DNA B, complete sequence'
begomovirus	'NC_031457.1 Sida angular mosaic virus isolate BLS30_2H segment DNA-B, complete sequence'
begomovirus	'NC_038474.1 Tomato leaf distortion virus isolate BR:Pda4:05 segment DNA-A, complete sequence'
begomovirus	'NC_005850.1 Tomato mosaic leaf curl virus DNA A, complete genome'
begomovirus	'NC_016579.1 Sida mosaic Alagoas virus DNA-B, complete genome'
begomovirus	'NC_023849.1 Pouzolzia golden mosaic virus isolate TY01 segment DNA-A, complete sequence'
begomovirus	'NC_019568.1 Bean chlorosis virus isolate Venezuela:La Barinesa 459:2006 segment DNA-B, complete sequence'
begomovirus	'NC_011346.1 Clerodendrum golden mosaic China virus DNA A, complete genome'
begomovirus	'NC_002984.1 Cucurbit leaf crumple virus DNA A, complete sequence'
begomovirus	'NC_024810.1 Coccinia mosaic Tamil Nadu virus isolate TN TDV Coc 1 segment DNA A, complete sequence'
begomovirus	'NC_037305.1 Rhynchosia golden mosaic virus strain 1068 segment DNA-B, complete sequence'
begomovirus	'NC_038972.1 VEM begomovirus 7 isolate Sp5-4, complete sequence'
begomovirus	'NC_011347.1 Clerodendrum golden mosaic China virus DNA B, complete genome'
begomovirus	'NC_005811.1 Tomato yellow leaf curl Kanchanaburi virus DNA B, complete sequence'
begomovirus	'NC_007966.1 Merremia mosaic virus DNA B, complete sequence'
begomovirus	'NC_004648.1 Tomato leaf curl Malaysia virus, complete genome'
begomovirus	'NC_019035.1 Blechum interveinal chlorosis virus DNA A, complete genome'
begomovirus	'NC_010812.1 Ageratum yellow vein Hualian virus-[Taiwan:Hsinchu:tom:2003] DNA A, complete sequence'
begomovirus	'NC_003357.1 Soybean crinkle leaf virus, complete genome'
begomovirus	'NC_012787.1 Passionfruit severe leaf distortion virus DNA-B, complete genome'
begomovirus	'NC_006956.1 Begomovirus-associated DNA-II, complete genome'
begomovirus	'NC_014747.1 Tomato leaf curl Cameroon alphasatellite, complete genome'
begomovirus	'NC_003804.1 South African cassava mosaic virus DNA B, complete sequence'
begomovirus	'NC_040186.1 Pepper yellow leaf curl Thailand virus isolate WF-SPN-Pep2015 segment DNA-B, complete sequence'
begomovirus	'NC_000870.1 Tomato yellow leaf curl Thailand virus DNA B, complete sequence'
begomovirus	'NC_039083.1 Bendhi Yellow Vein Mosaic/Mesta Yellow Vein Mosaic alphasatellite, complete sequence, clone 10a1-RCA-aI-F'
begomovirus	'NC_031456.1 Sida angular mosaic virus isolate ALS30_4C segment DNA-A, complete sequence'
begomovirus	'NC_038885.1 Rhynchosia yellow mosaic virus, segment DNA-A, complete genome'
begomovirus	'NC_015046.1 Sida mosaic Bolivia virus 1 DNA-A, complete genome'
begomovirus	'NC_007339.1 Squash leaf curl China virus - [B] DNA-A, complete genome'
begomovirus	'NC_017004.1 Cassava mosaic Madagascar virus DNA A, complete genome'
begomovirus	'NC_024895.1 Bitter gourd yellow vein virus isolate BD12C8 segment DNA-B, complete sequence'
begomovirus	'NC_040185.1 Pavonia mosaic virus isolate BR-Cor40-14 segment DNA-B, complete sequence'
begomovirus	'NC_038440.1 Chenopodium leaf curl virus, complete genome'
begomovirus	'NC_005046.1 Ageratum leaf curl disease associated sequence virion, complete genome'
begomovirus	'NC_019947.1 Tomato yellow mottle virus segment DNA-B, complete sequence'
begomovirus	'NC_001937.1 Squash leaf curl virus B component DNA, complete sequence'
begomovirus	'NC_035473.1 Emilia sonchifolia yellow vein Thailand virus isolate TH4872-6 segment DNA-A, complete sequence'
begomovirus	'NC_008495.1 Desmodium leaf distortion virus segment DNA-B, complete sequence'
begomovirus	'NC_005812.1 Tomato yellow leaf curl Kanchanaburi virus DNA A, complete sequence'
begomovirus	'NC_008237.1 Siegesbeckia yellow vein virus-[GD13]-associated DNA beta, complete genome'
begomovirus	'NC_038795.1 Cotton chlorotic spot virus isolate Brazil:CampinaGrandeB012:2009 segment DNA-B, complete sequence'
begomovirus	'NC_043517.1 Pepper leafroll virus isolate PE:P107:pep:2009 segment DNA A, complete sequence'
begomovirus	'NC_029804.1 Deinbollia mosaic virus isolate DB_T1A segment DNA-A, complete sequence'
begomovirus	'NC_007726.1 Tomato yellow spot virus DNA-A, complete genome'
begomovirus	'NC_003609.1 Honeysuckle yellow vein mosaic virus, complete genome'
begomovirus	'NC_038450.1 Leonurus mosaic virus isolate PR 88 segment DNA-A, complete sequence'
begomovirus	'NC_001929.2 Abutilon mosaic virus subgenome DNA B'
begomovirus	'NC_040190.1 Common bean severe mosaic virus isolate Cuba:Mayabeque 99:2014 segment DNA-B, complete sequence'
begomovirus	'NC_033779.1 Tomato leaf curl Burkina Faso virus isolate Burkina Faso:Loumbila:Tomate51B1:2013, complete genome'
begomovirus	'NC_013639.1 Tomato leaf curl Cameroon virus - [Cameroon:Buea:Okra:2008], complete genome'
begomovirus	'NC_014138.1 Abutilon Brazil virus DNA A segment, complete sequence'
begomovirus	'NC_018864.1 Tomato leaf curl Yemen betasatellite, complete genome'
begomovirus	'NC_024012.1 Jatropha mosaic virus strain Jamaica:Spanish Town:2004 clone A1 segment DNA-A, complete sequence'
begomovirus	'NC_038801.1 Rhynchosia golden mosaic Havana virus-[Cuba:Havana:28:2007] segment DNA-B, complete sequence'
begomovirus	'NC_025725.1 Jatropha leaf crumple virus isolate SKJ1, complete genome'
begomovirus	'NC_038990.1 Sida chlorotic mottle virus isolate BR:Trm531.1:10, complete sequence'
begomovirus	'NC_002981.1 Ageratum yellow vein Sri Lanka virus segment A, complete genome'
begomovirus	'NC_004676.1 East African cassava mosaic virus DNA B, complete sequence'
begomovirus	'NC_010947.1 Allamanda leaf curl virus DNA-A, complete genome'
begomovirus	'NC_040191.1 Sida bright yellow mosaic virus isolate BR:Tac720:10, complete sequence'
begomovirus	'NC_004644.1 Potato yellow mosaic Trinidad virus DNA B, complete sequence'
begomovirus	'NC_005320.1 Tomato leaf curl China virus - [G32], complete sequence'
begomovirus	'NC_004100.1 Macroptilium yellow mosaic Florida virus DNA B, complete sequence'
begomovirus	'NC_013640.2 Sweet potato leaf curl Bengal virus - [India:West Bengal:2008] segment A, complete genome'
begomovirus	'NC_029105.1 Pavonia yellow mosaic virus isolate BR-Alb51-14 segment DNA-A, complete sequence'
begomovirus	'NC_005051.1 Okra yellow vein disease associated sequence virion, complete genome'
begomovirus	'NC_022005.1 Bean white chlorosis mosaic virus isolate Venezuela:Rubio 932:2007 segment DNA-A, complete sequence'
begomovirus	'NC_038875.1 Chilli leaf curl India virus segment A, complete genome'
begomovirus	'NC_005845.1 Squash leaf curl Philippines virus segment A, complete genome'
begomovirus	'NC_016649.1 Hollyhock yellow vein mosaic virus, complete genome'
begomovirus	'NC_038890.1 Tobacco leaf rugose virus DNA-A, complete sequence'
begomovirus	'NC_008317.1 Siegesbeckia yellow vein Guangxi virus, complete genome'
begomovirus	'NC_038797.1 Jacquemontia mosaic Yucatan virus segment DNA-B, complete sequence'
begomovirus	'NC_003861.1 Sri Lankan cassava mosaic virus-[Colombo] DNA-A, complete genome, isolate SLCMV-Col'
begomovirus	'NC_001938.1 Tomato mottle virus DNA A, complete sequence'
begomovirus	'NC_007730.2 Vernonia yellow vein virus DNA-A, complete genome'
begomovirus	'NC_029994.1 Tobacco leaf curl virus isolate KH6, complete genome'
begomovirus	'NC_014795.1 Sida golden mosaic Buckup virus-[Jamaica:St. Elizabeth:2004] DNA-B, complete genome'
begomovirus	'NC_009030.1 Tomato leaf curl Arusha virus DNA-A, complete sequence'
begomovirus	'NC_038973.1 Whitefly associated Guatemala alphasatellite 2 isolate GtTo2-1, complete sequence'
begomovirus	'NC_020257.1 Tomato rugose yellow leaf curl virus isolate U2 clone 1 segment DNA_A, complete sequence'
begomovirus	'NC_038457.1 Sida common mosaic virus isolate BR:Coi4:07 segment DNA-A, complete sequence'
begomovirus	'NC_006358.1 Corchorus yellow vein virus - [Hoa Binh] DNA A, complete genome'
begomovirus	'NC_006632.1 Malvastrum yellow vein Yunnan virus satellite DNA beta, complete genome'
begomovirus	'NC_002510.1 Cotton leaf curl Gezira virus, complete genome'
begomovirus	'NC_038926.1 Tomato leaf curl Nepal betasatellite C1 gene, clone nept4-12'
begomovirus	'NC_007290.1 Cotton leaf curl Bangalore virus segment A, complete genome'
begomovirus	'NC_015324.1 Sweet potato golden vein associated virus, complete genome'
begomovirus	'NC_010838.1 Blainvillea yellow spot virus DNA-B, complete genome'
begomovirus	'NC_012120.1 Gossypium punctatum mild leaf curl virus DNA B, complete genome'
begomovirus	'NC_010948.1 Wissadula golden mosaic St Thomas Virus DNA A, complete sequence'
begomovirus	'NC_038470.1 Tomato leaf curl New Delhi virus 2, complete genome'
begomovirus	'NC_033618.1 Pea leaf distortion betasatellite clone N36-54, complete sequence'
begomovirus	'NC_024809.1 Coccinia mosaic Tamil Nadu virus isolate TN TDV Coc 1 segment DNA B, complete sequence'
begomovirus	'NC_004824.1 Loofa yellow mosaic virus DNA A, complete sequence'
begomovirus	'NC_014895.1 Bhendi yellow vein mosaic betasatellite [India:Coimbator:OYCO1:2005], complete genome'
begomovirus	'NC_028141.1 Melochia mosaic virus DNA B, complete sequence'
begomovirus	'NC_023015.1 Hedyotis uncinella yellow mosaic betasatellite isolate VN1, complete genome'
begomovirus	'NC_016965.1 Tomato leaf curl Ranchi virus DNA-A, complete genome'
begomovirus	'NC_025266.1 Tomato mottle wrinkle virus isolate Ar:Pichanal:400 segment DNA-B, complete sequence'
begomovirus	'NC_031760.1 Cotton leaf curl virus isolate Faz-14, complete genome'
begomovirus	'NC_038887.1 Sida Brazil virus segment DNA A, complete sequence'
begomovirus	'NC_043119.1 Eupatorium yellow vein virus - [Yamaguchi] DNA, complete genome'
begomovirus	'NC_009645.1 Kudzu mosaic virus DNA-A, complete sequence'
begomovirus	'NC_022645.1 East African cassava mosaic Malawi virus clone EACMMV[MA:07:S4] AV2 (AV2), CP (AV1), REn (AC3), TrAP (AC2), and Rep genes, complete cds'
begomovirus	'NC_011268.1 Jatropha leaf curl virus DNA A, complete genome'
begomovirus	'NC_038803.1 Rhynchosia golden mosaic Sinaloa virus segment B, complete sequence'
begomovirus	'NC_004580.1 Cotton leaf crumple virus DNA A, complete sequence'
begomovirus	'NC_038884.1 Hollyhock leaf curl virus, complete genome, isolate [Pakistan:20-4:06] Faisalabad3'
begomovirus	'NC_024491.1 Mirabilis leaf curl virus, complete sequence, isolate Pragpur'
begomovirus	'NC_030403.1 Telfairia golden mosaic virus isolate Cameroon-Bakundu Bangang-Telfairia-20-14 segment DNA-A, complete sequence'
begomovirus	'NC_004618.1 Chayote yellow mosaic virus, complete genome'
begomovirus	'NC_038991.1 Sida bright yellow mosaic virus isolate BR:Tac720:10, complete sequence'
begomovirus	'NC_009490.1 Tomato mild yellow leaf curl Aragua virus DNA A, complete sequence'
begomovirus	'NC_007723.1 Tomato leaf curl Joydebpur virus DNA-A, complete genome'
begomovirus	'NC_028046.1 Chilli leaf curl Ahmedabad virus-India [India/Ahmedabad/2014], complete genome'
begomovirus	'NC_016999.1 Macroptilium yellow spot virus DNA A, complete sequence'
begomovirus	'NC_020889.1 Ageratum leaf curl betasatellite isolate Sikar M 2, complete sequence'
begomovirus	'NC_038876.1 Clerodendrum golden mosaic Jiangsu virus complete DNA-A genome, isolate YX2'
begomovirus	'NC_015627.1 Tobacco yellow crinkle virus DNA A, complete genome'
begomovirus	'NC_015047.1 Sida mosaic Bolivia virus 2 DNA-B, complete genome'
begomovirus	'NC_008267.1 Tomato yellow leaf curl Indonesia virus-[Lembang], complete genome'
begomovirus	'NC_038897.1 Tomato leaf curl Moheli virus cp, v2, c2 c3 and c4 genes, isolated in Fomboni, Comoros'
begomovirus	'NC_040187.1 Lycianthes yellow mosaic virus isolate GD segment DNA-B, complete sequence'
begomovirus	'NC_009644.1 Corchorus golden mosaic virus DNA-A, complete sequence'
begomovirus	'NC_027215.1 Tomato yellow leaf curl Mali virus complete genome, isolate Tom-141'
begomovirus	'NC_003898.1 Tomato leaf curl Taiwan virus, complete genome'
begomovirus	'NC_008057.1 Tomato golden mottle virus DNA B, complete sequence'
begomovirus	'NC_007338.1 Squash leaf curl China virus - [B] DNA B, complete sequence'
begomovirus	'NC_014847.1 Okra leaf curl India virus [India:Sonipat EL14A:2006] DNA-A, complete genome'
begomovirus	'NC_024779.1 Dolichos yellow mosaic virus isolate DA segment DNA B, complete sequence'
begomovirus	'NC_010839.1 Tomato leaf curl Palampur virus DNA B, complete sequence'
begomovirus	'NC_009451.1 Clerodendron yellow mosaic virus, complete genome'
begomovirus	'NC_016573.1 Sida mosaic Alagoas virus DNA-A, complete genome'
begomovirus	'NC_005049.1 Tobacco leaf curl disease associated sequence virion, complete genome'
begomovirus	'NC_014130.1 Sida golden mottle virus DNA-A, complete genome'
begomovirus	'NC_009549.1 Erectites yellow mosaic virus DNA-A, complete sequence'
begomovirus	'NC_016575.1 Asystasia begomovirus 1 segment DNA-A, complete sequence'
begomovirus	'NC_015928.1 Vernonia yellow vein Fujian virus betasatellite, complete genome'
begomovirus	'NC_038444.1 Cotton leaf curl Gezira virus-[Cotton] A component, complete genome'
begomovirus	'NC_038992.1 Sida golden yellow spot virus isolate BR:Sab889:10, complete sequence'
begomovirus	'NC_013102.1 Tomato leaf curl Hainan virus, complete genome'
begomovirus	'NC_009546.1 Mimosa yellow leaf curl virus DNA-A, complete sequence'
begomovirus	'NC_014647.1 Malvastrum yellow vein Changa Manga virus, complete genome'
begomovirus	'NC_043418.1 Eupatorium yellow vein virus-[MNS2] complete genome, isolate Fukuoka-MNS2'
begomovirus	'NC_007724.1 Malvastrum leaf curl virus - [G87], complete genome'
begomovirus	'NC_010238.1 Radish leaf curl virus segment A, complete sequence'
begomovirus	'NC_004559.1 Tomato leaf curl Gujarat virus - [Varanasi] segment B, complete sequence'
begomovirus	'NC_006631.1 Malvastrum yellow vein Yunnan virus, complete genome'
begomovirus	'NC_029995.1 Tomato yellow leaf curl Shuangbai virus - [Y4536], complete genome'
begomovirus	'NC_010792.1 Ramie mosaic virus DNA-B, complete genome'
begomovirus	'NC_021579.1 Tomato golden leaf spot virus isolate TO83 Araguaina segment DNA-A, complete sequence'
begomovirus	'NC_038458.1 Sida golden mosaic Braco virus-[Jamaica:Liguanea:2008] clone pBrA4, complete genome'
begomovirus	'NC_038442.1 Chilli Leaf curl Vellanad virus [India/Vellanad/2008] clone pChVelK52 segment DNA-A, complete sequence'
begomovirus	'NC_007727.1 Tomato yellow spot virus DNA-B, complete genome'
begomovirus	'NC_003709.1 Watermelon chlorotic stunt virus DNA B, complete sequence'
begomovirus	'NC_016083.1 Sida yellow mottle virus strain Cuba:Sancti Spiritus159-1:2009 segment DNA-B, complete sequence'
begomovirus	'NC_014846.1 Bhendi yellow vein India betasatellite [India:Aurangabad:OY164:2006], complete genome'
begomovirus	'NC_035488.1 Macroptilium golden yellow mosaic virus isolate DR:M45:16 segment DNA B, complete sequence'
begomovirus	'NC_008494.1 Desmodium leaf distortion virus DNA A, complete sequence'
begomovirus	'NC_010835.1 Tomato common mosaic virus DNA-A, complete genome'
begomovirus	'NC_014744.1 Ageratum leaf curl Cameroon alphasatellite, complete genome'
begomovirus	'NC_005635.1 Horsegram yellow mosaic virus, complete genome'
begomovirus	'NC_001369.1 Pepper huasteco yellow vein virus DNA B, complete sequence'
begomovirus	'NC_029803.1 Deinbollia mosaic virus isolate DB_T1B segment DNA-B, complete sequence'
begomovirus	'NC_015044.1 Sida mosaic Bolivia virus 1 DNA-B, complete genome'
begomovirus	'NC_038891.1 Tobacco leaf curl betasatellite-[Pakistan:Multan:Pedilanthus:2004] C1 gene, clone ptvbeta'
begomovirus	'NC_012492.1 Tomato leaf curl Patna virus DNA-A, complete genome'
begomovirus	'NC_014794.1 Sida golden mosaic Buckup virus-[Jamaica:St. Elizabeth:2004] DNA-A, complete genome'
begomovirus	'NC_014594.1 Tomato leaf curl Bangladesh betasatellite, complete genome'
begomovirus	'NC_032118.1 Vernonia crinkle virus isolate UG7, complete sequence'
begomovirus	'NC_018457.1 Soybean chlorotic spot virus DNA-A, complete sequence'
begomovirus	'NC_005875.1 Cucurbita yellow vein virus-associated DNA beta, complete genome'
begomovirus	'NC_014645.1 Ageratum leaf curl Cameroon virus, complete genome'
begomovirus	'NC_008794.1 Crassocephalum yellow vein virus - Jinghong, complete genome'
non-begomovirus	'JQ707940.1 Beet curly top Iran virus isolate IR:Neg:B19K:Sug:04, complete genome'
non-begomovirus	'KX867021.1 Beet curly top virus isolate CTS06-065, complete genome'
non-begomovirus	'MF579394.1 Prunus geminivirus A isolate HTS, complete genome'
non-begomovirus	'JQ707950.1 Beet curly top Iran virus isolate IR:Neg:B34P:Sug:08, complete genome'
non-begomovirus	'KJ437670.1 Maize streak Reunion virus isolate MSRV_NG_NG9_Ife_2011, complete genome'
non-begomovirus	'MH603855.1 Alfalfa leaf curl virus isolate SyAl45-17, complete genome'
non-begomovirus	'KJ536107.1 Wheat dwarf virus isolate SXDT07-3, complete genome'
non-begomovirus	'KT388084.1 Turnip leaf roll virus clone Z4-12, complete genome'
non-begomovirus	'KY304939.1 Maize streak virus isolate MSV_KE_Kir3_K267B_11, complete genome'
non-begomovirus	'MH595443.1 Sesame curly top virus isolate IR/Jir/JIR36/Ses/17, complete genome'
non-begomovirus	'MH557096.1 Grapevine red blotch virus isolate Guadalupe-JGB, complete genome'
non-begomovirus	'KT388068.1 Turnip curly top virus clone Z2-4, complete genome'
non-begomovirus	'MH603852.1 Alfalfa leaf curl virus isolate ES53, complete genome'
non-begomovirus	'KC108895.1 Turnip curly top virus isolate IR:Lap:L2-P:Tur:12, complete genome'
non-begomovirus	'HQ693315.1 Maize streak virus isolate MSV-A_CF_Boss2_Car35-2008, complete genome'
non-begomovirus	'KT276906.1 Beet curly top virus isolate CTS06-17, complete genome'
non-begomovirus	'JX912248.1 Beet curly top Iran virus isolate Zarghan, complete genome'
non-begomovirus	'NC_001647.1 Panicum streak virus - Karino, complete genome'
non-begomovirus	'EU273816.1 Beet curly top Iran virus-[Yazd], complete genome'
non-begomovirus	'KT276895.1 Beet curly top virus isolate CTS06-53, complete genome'
non-begomovirus	'KX234090.1 Grapevine red-blotch associated virus isolate BCRB3, complete genome'
non-begomovirus	'EU628586.1 Maize streak virus isolate MSV-B1_Za-Lig-g213-2007, complete genome'
non-begomovirus	'KC896624.1 Grapevine red blotch-associated virus isolate CS337-1, complete genome'
non-begomovirus	'HQ634913.1 Beet curly top virus clone 8-10, complete genome'
non-begomovirus	'MF795142.1 Grapevine red blotch virus isolate ARSY5, complete genome'
non-begomovirus	'KT214402.1 Alfalfa leaf curl virus isolate PB14_LUZ177 V3 (V3) gene, complete cds'
non-begomovirus	'KT214384.1 Euphorbia caput-medusae latent virus isolate PAT12_CM96, complete genome'
non-begomovirus	'KT214366.1 Alfalfa leaf curl virus isolate ALB14_LUZ164, complete genome'
non-begomovirus	'NC_003744.1 Sugarcane streak virus - [Natal], complete genome'
non-begomovirus	'KM229897.1 Chickpea chlorotic dwarf virus isolate CpCDV_H_SD_SD28_2013, complete genome'
non-begomovirus	'HQ693458.1 Maize streak virus isolate MSV-A_ZM_Chi7_Z11-2008, complete genome'
non-begomovirus	'JX094281.1 French bean severe leaf curl virus isolate FbSLCV-2, complete genome'
non-begomovirus	'NC_040792.1 Rice latent virus 1 isolate AU-NA63-2015, complete genome'
non-begomovirus	'MK573562.1 Grapevine red blotch virus isolate NC-172 V2 protein gene, complete cds'
non-begomovirus	'KX867043.1 Beet curly top virus isolate CTS13-062, complete genome'
non-begomovirus	'KX867046.1 Beet curly top virus isolate CTS14-054, complete genome'
non-begomovirus	'JX945570.1 Beet curly top Iran virus isolate IR:Boj:3Beet:Sug:10, complete genome'
non-begomovirus	'EU921828.1 Pepper yellow dwarf virus - New Mexico, complete genome'
non-begomovirus	'MF795174.1 Grapevine red blotch virus isolate SICS60, complete genome'
non-begomovirus	'KY316018.1 Grapevine red-blotch associated virus isolate BCRB29, complete genome'
non-begomovirus	'KT958252.1 Wheat dwarf virus isolate RDLTA09, complete genome'
non-begomovirus	'KT276910.1 Beet curly top virus isolate CTS07-48, complete genome'
non-begomovirus	'KT276912.1 Beet curly top virus isolate CTS07-56, complete genome'
non-begomovirus	'KX533466.1 Beet curly top Iran virus isolate BCTIV_IR_CZ7_2013, complete genome'
non-begomovirus	'JQ707943.1 Beet curly top Iran virus isolate IR:Kam:B24K:Sug:08, complete genome'
non-begomovirus	'MH603854.1 Alfalfa leaf curl virus isolate SyAl40-17, complete genome'
non-begomovirus	'MH603838.1 Alfalfa leaf curl virus isolate JoAl30-17, complete genome'
non-begomovirus	'KT276918.1 Beet curly top virus isolate CTS07-129, complete genome'
non-begomovirus	'MF185002.1 Wild vitis virus 1 isolate WVV1-NY1298, complete genome'
non-begomovirus	'MF696143.1 Grapevine red blotch virus isolate TUCF84, complete genome'
non-begomovirus	'HQ693472.1 Maize streak virus isolate MSV-A_ZW_Maz2_Bet33-2006, complete genome'
non-begomovirus	'MF696145.1 Grapevine red blotch virus isolate LNSA1, complete genome'
non-begomovirus	'KT214407.1 Alfalfa leaf curl virus isolate PB14_GS7 V3 (V3) gene, complete cds'
non-begomovirus	'KX867030.1 Beet curly top virus isolate CTS06-102, complete genome'
non-begomovirus	'MH603813.1 Alfalfa leaf curl virus isolate E221, complete genome'
non-begomovirus	'MF504035.1 Prunus geminivirus A clone AP12-10, complete genome'
non-begomovirus	'KX867024.1 Beet curly top virus isolate CTS06-070, complete genome'
non-begomovirus	'KX867027.1 Beet curly top virus isolate CTS06-081, complete genome'
non-begomovirus	'MH603832.1 Alfalfa leaf curl virus isolate I31, complete genome'
non-begomovirus	'MG976082.1 Wild vitis virus 1 isolate Solano7, complete genome'
non-begomovirus	'MF795144.1 Grapevine red blotch virus isolate ARSY13, complete genome'
non-begomovirus	'MG792052.1 Alfalfa leaf curl virus isolate Chimpay, complete genome'
non-begomovirus	'MH603814.1 Alfalfa leaf curl virus isolate MAP4, complete genome'
non-begomovirus	'MF795160.1 Grapevine red blotch virus isolate NPPS7, complete genome'
non-begomovirus	'U02311.1 Beet severe curly top virus - Cfh, complete genome'
non-begomovirus	'KU564254.1 Grapevine red-blotch associated virus isolate NY913, complete genome'
non-begomovirus	'MH603819.1 Alfalfa leaf curl virus isolate 12LO, complete genome'
non-begomovirus	'LC160268.1 Tomato curly top virus DNA, complete genome, isolate: JP-Fuk-K6-10'
non-begomovirus	'KT214357.1 Alfalfa leaf curl virus isolate SSL14_Toul7, complete genome'
non-begomovirus	'MF504030.1 Prunus geminivirus A clone AP4-10, complete genome'
non-begomovirus	'NC_012664.1 Eragrostis curvula streak virus, complete genome'
non-begomovirus	'MG792032.1 Alfalfa leaf curl virus isolate Calchin, complete genome'
non-begomovirus	'MH085199.1 Alfalfa leaf curl virus isolate 12UK, complete genome'
non-begomovirus	'KT214392.1 Alfalfa leaf curl virus isolate Spain_0913*54 V3 (V3) gene, complete cds'
non-begomovirus	'NC_030238.1 Euphorbia caput-medusae latent virus isolate DAR12_CM243, complete genome'
non-begomovirus	'NC_003825.1 Tomato pseudo-curly top virus, complete genome'
non-begomovirus	'KT388074.1 Turnip curly top virus clone Z4-22, complete genome'
non-begomovirus	'NC_043533.1 Prunus geminivirus A isolate PL4 clone PL4-11, complete genome'
non-begomovirus	'KY304942.1 Maize streak virus isolate MSV_KE_Sia6_K27B_09, complete genome'
non-begomovirus	'KT214381.1 Euphorbia caput-medusae latent virus isolate DAR12_CM186, complete genome'
non-begomovirus	'JQ707951.1 Beet curly top Iran virus isolate IR:Yaz:B35K:Sug:06, complete genome'
non-begomovirus	'KT388087.1 Turnip leaf roll virus clone Z11-4, complete genome'
non-begomovirus	'MF795170.1 Grapevine red blotch virus isolate IDGN580, complete genome'
non-begomovirus	'KC108894.1 Turnip curly top virus isolate IR:Zaf:Z8:Tur:12, complete genome'
non-begomovirus	'KT276913.1 Beet curly top virus isolate CTS07-57, complete genome'
non-begomovirus	'KY311956.1 Maize streak virus isolate MSV_MG_FOF_mad2_09, complete genome'
non-begomovirus	'KY304921.1 Maize streak virus isolate MSV_KE_Bun3_K237_10, complete genome'
non-begomovirus	'KC108900.1 Turnip curly top virus isolate IR:Zaf:Z2-18:Tur:12, complete genome'
non-begomovirus	'JQ707949.1 Beet curly top Iran virus isolate IR:Neg:B33P:Sug:08, complete genome'
non-begomovirus	'KX867037.1 Beet curly top virus isolate CTS07-043, complete genome'
non-begomovirus	'MH476298.1 Grapevine red blotch virus isolate NSRB5, complete genome'
non-begomovirus	'KU564253.1 Grapevine red-blotch associated virus isolate NY705, complete genome'
non-begomovirus	'MK955838.1 Grapevine red blotch virus isolate TN295 coat protein gene, complete cds'
non-begomovirus	'MG792049.1 Alfalfa leaf curl virus isolate EEA Santiago del Estero, complete genome'
non-begomovirus	'JX082259.1 Beet curly top Iran virus-[Siv], complete genome'
non-begomovirus	'MF795143.1 Grapevine red blotch virus isolate ARCS10, complete genome'
non-begomovirus	'KY316009.1 UNVERIFIED: Grapevine red-blotch associated virus isolate BCRB20, complete genome'
non-begomovirus	'NC_035480.1 Wild vitis virus 1 isolate WVV1-NY1468, complete genome'
non-begomovirus	'GU456688.1 Turnip curly top virus isolate IR:Hom3:4k:09, complete genome'
non-begomovirus	'MH603860.1 Alfalfa leaf curl virus isolate TuAl20_17, complete genome'
non-begomovirus	'KY316016.1 Grapevine red-blotch associated virus isolate BCRB27, complete genome'
non-begomovirus	'KT214398.1 Alfalfa leaf curl virus isolate ARM14_LUZ123 V3 (V3) gene, complete cds'
non-begomovirus	'KF137562.1 Grapevine geminivirus isolate OR1a, complete genome'
non-begomovirus	'KY426922.1 Grapevine red-blotch associated virus isolate 93-26, complete genome'
non-begomovirus	'MH603812.1 Alfalfa leaf curl virus isolate LARAGNE5, complete genome'
non-begomovirus	'KX867025.1 Beet curly top virus isolate CTS06-073, complete genome'
non-begomovirus	'NC_020502.1 Guar leaf curl alphasatellite clone B81_A03, complete sequence'
non-begomovirus	'MG792028.1 Alfalfa leaf curl virus isolate Guanacache, complete genome'
non-begomovirus	'MG792050.1 Alfalfa leaf curl virus isolate Piedritas, complete genome'
non-begomovirus	'KF147915.1 Grapevine red blotch-associated virus isolate NY271 coat protein gene, complete cds'
non-begomovirus	'KT388071.1 Turnip curly top virus clone Z4-7, complete genome'
non-begomovirus	'KT583730.1 Beet curly top virus isolate California F1-1-3, complete genome'
non-begomovirus	'KT214386.1 Euphorbia caput-medusae latent virus isolate PAT12_CM101, complete genome'
non-begomovirus	'MH557095.1 Grapevine red blotch virus isolate Guadalupe-JCT, complete genome'
non-begomovirus	'KT214390.1 Plantago lanceolata latent virus isolate ALA13_Pl5, complete genome'
non-begomovirus	'KM229907.1 Chickpea chlorotic dwarf virus isolate CpCDV_K_SD_SD276_2013, complete genome'
non-begomovirus	'NC_001346.2 Maize streak virus - A[Ama], complete genome'
non-begomovirus	'KT214405.1 Alfalfa leaf curl virus isolate PB14_LUZ186 V3 (V3) gene, complete cds'
non-begomovirus	'MG792047.1 Alfalfa leaf curl virus isolate Hilario Ascasubi, complete genome'
non-begomovirus	'EU273818.1 Beet curly top Iran virus-[K], complete genome'
non-begomovirus	'HQ693437.1 Maize streak virus isolate MSV-A_ZA_Tra_D4-2006, complete genome'
non-begomovirus	'KT214372.1 Alfalfa leaf curl virus isolate PB14_LUZ178, complete genome'
non-begomovirus	'MH603810.1 Alfalfa leaf curl virus isolate ENTZ2, complete genome'
non-begomovirus	'GU456689.1 Turnip curly top virus isolate IR:Hom3:7k:09, complete genome'
non-begomovirus	'HQ693382.1 Maize streak virus isolate MSV-A_NG_Ile_N34-2007, complete genome'
non-begomovirus	'MH603848.1 Alfalfa leaf curl virus isolate ES34, complete genome'
non-begomovirus	'MF504033.1 Prunus geminivirus A clone AP10-19, complete genome'
non-begomovirus	'KY304946.1 Maize streak virus isolate MSV_KE_Kia5_K275Bh1_11, complete genome'
non-begomovirus	'M24597.2 Beet curly top virus - California [Logan], complete genome'
non-begomovirus	'NC_010797.1 Urochloa streak virus, complete genome'
non-begomovirus	'MG792037.1 Alfalfa leaf curl virus isolate Ojeda, complete genome'
non-begomovirus	'MH603826.1 Alfalfa leaf curl virus isolate 2LO, complete genome'
non-begomovirus	'KX867035.1 Beet curly top virus isolate CTS07-016, complete genome'
non-begomovirus	'KT214403.1 Alfalfa leaf curl virus isolate PB14_LUZ183 V3 (V3) gene, complete cds'
non-begomovirus	'MH603853.1 Alfalfa leaf curl virus isolate SyAl35-17, complete genome'
non-begomovirus	'KT214412.1 Alfalfa leaf curl virus isolate LAT14_Lat3 V3 (V3) gene, complete cds'
non-begomovirus	'NC_003379.1 Miscanthus streak virus - [91] DNA, complete genome'
non-begomovirus	'MH603824.1 Alfalfa leaf curl virus isolate 1BJ, complete genome'
non-begomovirus	'MF795156.1 Grapevine red blotch virus isolate DCMR01, complete genome'
non-begomovirus	'KT276914.1 Beet curly top virus isolate CTS07-59, complete genome'
non-begomovirus	'KY304988.1 Maize streak virus isolate MSV_KE_Kis19_K90B_08, complete genome'
non-begomovirus	'MH595449.1 Sesame curly top virus isolate IR/Jir/JK_1-6/14, complete genome'
non-begomovirus	'JX458087.1 Beet curly top Iran virus isolate IR:Nesh:115:Bean:10, complete genome'
non-begomovirus	'KY304932.1 Maize streak virus isolate MSV_KE_Lai1_K257BH1_11, complete genome'
non-begomovirus	'MF579393.1 Prunus geminivirus A isolate GF305, complete genome'
non-begomovirus	'MH603836.1 Alfalfa leaf curl virus isolate COURM2, complete genome'
non-begomovirus	'MH603849.1 Alfalfa leaf curl virus isolate ES36, complete genome'
non-begomovirus	'NC_025834.1 Switchgrass mosaic-associated virus 1 isolate Cloud Nine movement protein, capsid protein, replication-associated protein RepB, and replication-associated protein genes, complete cds'
non-begomovirus	'KT583735.1 Beet curly top virus isolate California FP8-9, complete genome'
non-begomovirus	'KX867048.1 Beet curly top virus isolate CTS14-070, complete genome'
non-begomovirus	'KX867044.1 Beet curly top virus isolate CTS13-063, complete genome'
non-begomovirus	'KT214370.1 Alfalfa leaf curl virus isolate BON14_LUZ076, complete genome'
non-begomovirus	'KT583746.1 Beet curly top virus isolate California SJ-Y1-37, complete genome'
non-begomovirus	'JX987671.1 Beet curly top Iran virus isolate IR:Hom:Tu69:Sea beet:10, complete genome'
non-begomovirus	'MG792022.1 Alfalfa leaf curl virus isolate Charata, complete genome'
non-begomovirus	'MG792043.1 Alfalfa leaf curl virus isolate Monte Coman, complete genome'
non-begomovirus	'MG792020.1 Alfalfa leaf curl virus isolate Tapia, complete genome'
non-begomovirus	'KT214422.1 Alfalfa leaf curl virus isolate LD14_Lag4 V3 (V3) gene, complete cds'
non-begomovirus	'KF147916.1 Grapevine red blotch-associated virus isolate NY175 coat protein gene, complete cds'
non-begomovirus	'MF795152.1 Grapevine red blotch virus isolate CYTP4, complete genome'
non-begomovirus	'MK955836.1 Grapevine red blotch virus isolate TN271 coat protein gene, complete cds'
non-begomovirus	'KT583732.1 Beet curly top virus isolate FB1-18, complete genome'
non-begomovirus	'KX867029.1 Beet curly top virus isolate CTS06-101, complete genome'
non-begomovirus	'NC_027714.1 Alfalfa leaf curl virus isolate 44-1E, complete genome'
non-begomovirus	'MG792045.1 Alfalfa leaf curl virus isolate Pergamino, complete genome'
non-begomovirus	'KC108904.1 Turnip curly top virus isolate IR:Hom:H8:Tur:12, complete genome'
non-begomovirus	'KM229972.1 Maize streak virus isolate K31, complete genome'
non-begomovirus	'KT214427.1 Alfalfa leaf curl virus isolate SSL14_Toul6 V3 (V3) gene, complete cds'
non-begomovirus	'KX867038.1 Beet curly top virus isolate CTS07-091, complete genome'
non-begomovirus	'KY304871.1 Maize streak virus isolate MSV_KE_Kak1_K164B_10, complete genome'
non-begomovirus	'KX867022.1 Beet curly top virus isolate CTS06-066, complete genome'
non-begomovirus	'KT214362.1 Alfalfa leaf curl virus isolate GAG14_LUZ193, complete genome'
non-begomovirus	'KX867016.1 Beet curly top virus isolate CTS06-012S, complete genome'
non-begomovirus	'MH603817.1 Alfalfa leaf curl virus isolate SH10, complete genome'
non-begomovirus	'FJ665629.1 Eragrostis curvula streak virus isolate ECSV-ZA-Gre2-g256-2007, complete genome'
non-begomovirus	'KR150789.1 Sugarcane striate virus isolate WZG, complete genome'
non-begomovirus	'MG792041.1 Alfalfa leaf curl virus isolate Volcan, complete genome'
non-begomovirus	'KT276900.1 Beet curly top virus isolate CTS14-14, complete genome'
non-begomovirus	'KT583733.1 Beet curly top virus isolate California FM3-1-10, complete genome'
non-begomovirus	'AB935398.1 Tomato curly top virus DNA, complete genome, isolate: JP-Fuk-K4-09'
non-begomovirus	'KC571252.1 Beet curly top Iran virus isolate Iran:Chenaran:5Beet:Sugar beet:2010, complete genome'
non-begomovirus	'MH603859.1 Alfalfa leaf curl virus isolate TuAl16_17, complete genome'
non-begomovirus	'KJ699307.1 Maize streak virus isolate MSV-A_GH-gh110-Fra-2010, complete genome'
non-begomovirus	'KT583731.1 Beet curly top virus isolate California F1-2-25, complete genome'
non-begomovirus	'KT214411.1 Alfalfa leaf curl virus isolate LAT14_Lat1 V3 (V3) gene, complete cds'
non-begomovirus	'MH603844.1 Alfalfa leaf curl virus isolate ES17, complete genome'
non-begomovirus	'KT583737.1 Beet curly top virus isolate California K2-10, complete genome'
non-begomovirus	'MF795164.1 Grapevine red blotch virus isolate TUMR5, complete genome'
non-begomovirus	'KM229834.1 Chickpea chlorotic dwarf virus isolate CpCDV_H_SD_SD171_2013, complete genome'
non-begomovirus	'KX533468.1 Turnip curly top virus isolate TCTV_IR_CZ7_2013, complete genome'
non-begomovirus	'KM229851.1 Chickpea chlorotic dwarf virus isolate CpCDV_H_SD_SD199_2013, complete genome'
non-begomovirus	'KT583742.1 Beet curly top virus isolate California M1-3-8, complete genome'
non-begomovirus	'KX867019.1 Beet curly top virus isolate CTS06-021, complete genome'
non-begomovirus	'KM229933.1 Panicum streak virus isolate g455, complete genome'
non-begomovirus	'NC_018576.1 Paspalum dilatatum striate mosaic virus, complete genome'
non-begomovirus	'KT276898.1 Beet curly top virus isolate CTS07-19, complete genome'
non-begomovirus	'MH595444.1 Sesame curly top virus isolate IR/Sir/LH_1-13/14, complete genome'
non-begomovirus	'KY618086.1 Maize streak virus isolate MSV-A_KE_Kim_O57_1990, complete genome'
non-begomovirus	'KT388080.1 Turnip leaf roll virus clone Z2-23, complete genome'
non-begomovirus	'KT276905.1 Beet curly top virus isolate CTS06-16, complete genome'
non-begomovirus	'MK928386.1 Grapevine red blotch virus isolate GRBV_IDA8_Syrah_2011, complete genome'
non-begomovirus	'EU628579.1 Maize streak virus isolate MSV-B1_Za-BakA-M10-1999, complete genome'
non-begomovirus	'NC_022002.1 Grapevine red blotch-associated virus isolate CF214-1, complete genome'
non-begomovirus	'MG792033.1 Alfalfa leaf curl virus isolate Lafinur, complete genome'
non-begomovirus	'MK087122.1 French bean severe leaf curl virus isolate FB1 segment DNA-A pre-coat protein (AV2), coat protein (AV1), replication enhancer protein (AC3), transcription activator protein (AC2), replication initiator protein (AC1), and AC4 (AC4) genes, complete cds'
non-begomovirus	'KY498152.1 Grapevine red blotch virus isolate OH14-1-1 capsid protein gene, complete cds'

## Sheet: Sheet2
DNA-A	'NC_038441.1 Chilli leaf curl Kanpur virus [India/Kanpur/2008] clone pChKanB19 segment DNA-A, complete sequence'
DNA-A	'NC_043514.1 Vernonia yellow vein Fujian virus isolate VeYVFjV segment DNA-A, complete sequence'
DNA-A	'NC_038459.1 Sida golden mosaic Lara virus strain Venezuela:Lara:M1:2009 segment DNA-A, complete sequence'
DNA-A	'NC_038440.1 Chenopodium leaf curl virus, complete genome'
DNA-A	'NC_043531.1 Datura leaf curl virus isolate Sudan-Datura 435-2016, complete genome'
DNA-A	'NC_016573.1 Sida mosaic Alagoas virus DNA-A, complete genome'
DNA-A	'NC_016574.1 Abutilon mosaic Brazil virus DNA-A, complete genome'
DNA-A	'NC_016575.1 Asystasia begomovirus 1 segment DNA-A, complete sequence'
DNA-A	'NC_038476.1 Asystasia begomovirus 2 segment DNA-A, complete sequence'
DNA-A	'NC_003865.1 Melon chlorotic leaf curl virus DNA A, complete sequence'
DNA-A	'NC_025964.1 Catharanthus yellow mosaic virus complete genome, isolate DR-151'
DNA-A	'NC_038469.1 Tomato interveinal chlorosis virus isolate PE[BR:Mdc2681:04] segment DNA-A, complete sequence'
DNA-A	'NC_016082.1 Sida yellow mottle virus strain Cuba:Sancti Spiritus159-1:2009 segment DNA-A, complete sequence'
DNA-A	'NC_009490.1 Tomato mild yellow leaf curl Aragua virus DNA A, complete sequence'
DNA-A	'NC_017004.1 Cassava mosaic Madagascar virus DNA A, complete genome'
DNA-A	'NC_016998.1 Centrosema yellow spot virus DNA-A, complete genome'
DNA-A	'NC_017001.1 Macroptilium yellow net virus DNA A, complete genome'
DNA-A	'NC_016999.1 Macroptilium yellow spot virus DNA A, complete sequence'
DNA-A	'NC_017000.1 Macroptilium yellow vein virus DNA-A, complete genome'
DNA-A	'NC_038455.1 Sauropus leaf curl virus isolate AFSP5e segment A, complete sequence'
DNA-A	'NC_020257.1 Tomato rugose yellow leaf curl virus isolate U2 clone 1 segment DNA_A, complete sequence'
DNA-A	'NC_028124.1 Vinca leaf curl virus isolate RK, complete sequence'
DNA-A	'NC_016580.1 Tomato dwarf leaf virus DNA-A, complete genome'
DNA-A	'NC_038454.1 Premna leaf curl virus isolate VN7 segment DNA-A, complete sequence'
DNA-A	'NC_038464.1 Sweet potato leaf curl China virus segment A, complete sequence'
DNA-A	'NC_038796.1 Jacquemontia mosaic Yucatan virus segment DNA-A, complete sequence'
DNA-A	'NC_019034.1 Jatropha mosaic Nigerian virus isolate 2 segment DNA-A, complete sequence'
DNA-A	'NC_018457.1 Soybean chlorotic spot virus DNA-A, complete sequence'
DNA-A	'NC_023849.1 Pouzolzia golden mosaic virus isolate TY01 segment DNA-A, complete sequence'
DNA-A	'NC_019569.1 Bean chlorosis virus isolate Venezuela:La Barinesa 459:2006 segment DNA-A, complete sequence'
DNA-A	'NC_018716.1 Dalechampia chlorotic mosaic virus isolate Venezuela:Albarico 1020:2007 segment DNA-A, complete sequence'
DNA-A	'NC_018717.1 Datura leaf distortion virus isolate Venezuela:Rubio 933:2007 segment DNA-A, complete sequence'
DNA-A	'NC_008793.1 Honeysuckle yellow vein mosaic virus-[Kagoshima], complete genome'
DNA-A	'NC_028985.1 Okra leaf curl Oman virus, complete genome, isolate OK-2'
DNA-A	'NC_019035.1 Blechum interveinal chlorosis virus DNA A, complete genome'
DNA-A	'NC_038456.1 Sida ciliaris golden mosaic virus strain Venezuela:Lara:M3:2009 segment DNA-A, complete sequence'
DNA-A	'NC_025265.1 Tomato mottle wrinkle virus isolate Ar:Pichanal:400 segment DNA-A, complete sequence'
DNA-A	'NC_020253.1 Sida yellow net virus isolate BR:Vic2:10 segment DNA-A, complete sequence'
DNA-A	'NC_020254.1 Sida yellow blotch virus isolate BR:Rla1:10 segment DNA-A, complete sequence'
DNA-A	'NC_020255.1 Sida yellow mosaic Alagoas virus isolate BR:Vsa3:10 segment DNA-A, complete sequence'
DNA-A	'NC_020256.1 Sida mottle Alagoas virus isolate BR:Vsa2:10 segment DNA-A, complete sequence'
DNA-A	'NC_020473.1 Corchorus yellow vein mosaic virus isolate CEA8, complete genome'
DNA-A	'NC_023312.1 Tomato leaf curl Liwa virus isolate LW1, complete genome'
DNA-A	'NC_022007.1 Capraria yellow spot Yucatan virus segment DNA-A, complete sequence'
DNA-A	'NC_038438.1 Abutilon golden mosaic Yucatan virus isolate Conkal-2007 segment A, complete sequence'
DNA-A	'NC_038475.1 Vigna yellow mosaic virus isolate Yautepec-2007 segment A, complete sequence'
DNA-A	'NC_024009.1 Allamanda leaf mottle distortion virus isolate Al-K1 segment DNA-A, complete sequence'
DNA-A	'NC_021202.1 Ageratum Yellow vein China virus - OX1, complete genome'
DNA-A	'NC_021205.1 Tomato leaf curl China virus - OX2, complete genome'
DNA-A	'NC_021245.1 Malvastrum leaf curl Philippines virus isolate Mc1 segment DNA-A, complete sequence'
DNA-A	'NC_021341.1 Tomato yellow leaf curl Yunnan virus isolate YN2013 clone 10 segment DNA-A, complete sequence'
DNA-A	'NC_021579.1 Tomato golden leaf spot virus isolate TO83 Araguaina segment DNA-A, complete sequence'
DNA-A	'NC_038467.1 Tomato bright yellow mosaic virus isolate BA167 segment DNA-A, complete sequence'
DNA-A	'NC_038453.1 Pouzolzia mosaic Guangdong virus isolate GD1 segment DNA-A, complete sequence'
DNA-A	'NC_022073.1 Hemidesmus yellow mosaic virus clone H1 segment DNA-A, complete sequence'
DNA-A	'NC_023034.1 Tomato leaf curl Gandhinagar virus isolate pToGNAX15 segment DNA-A, complete sequence'
DNA-A	'NC_043517.1 Pepper leafroll virus isolate PE:P107:pep:2009 segment DNA A, complete sequence'
DNA-A	'NC_022229.1 Tomato yellow leaf curl Saudi virus isolate Hail1, complete genome'
DNA-A	'NC_022232.1 Sweet potato leaf curl Shanghai virus isolate China:Jilin1:2012, complete genome'
DNA-A	'NC_038794.1 Cotton chlorotic spot virus isolate Brazil:CampinaGrandeB012:2009 segment DNA-A, complete sequence'
DNA-A	'NC_038448.1 Hedyotis uncinella yellow mosaic virus isolate VN1 segment DNA-A, complete sequence'
DNA-A	'NC_024491.1 Mirabilis leaf curl virus, complete sequence, isolate Pragpur'
DNA-A	'NC_023023.1 Spinach yellow vein Sikar virus clone AS22, complete genome'
DNA-A	'NC_011309.2 Jatropha yellow mosaic virus segment DNA-A, complete sequence'
DNA-A	'NC_021719.1 Sweet potato leaf curl Henan virus isolate China:Henan10:2012, complete genome'
DNA-A	'NC_024693.1 Sweet potato leaf curl Guangxi virus isolate China:Guangxi5:2011, complete genome'
DNA-A	'NC_038960.1 Jacquemontia yellow mosaic virus isolate [Venezuela:Rio Cocollar 1250:2009] segment DNA-A, complete sequence'
DNA-A	'NC_024116.1 Tomato leaf curl Barka virus isolate Tom-55, complete genome'
DNA-A	'NC_027129.1 Hollyhock yellow vein mosaic Islamabad virus complete genome, isolate 3AK'
DNA-A	'NC_024894.1 Bitter gourd yellow vein virus isolate BD12C8 segment DNA-A, complete sequence'
DNA-A	'NC_038802.1 Rhynchosia golden mosaic Sinaloa virus segment A, complete sequence'
DNA-A	'NC_033334.1 Sweet potato mosaic virus isolate KT10BII, complete genome'
DNA-A	'NC_038466.1 Sweet potato mosaic virus - [Brazil:Brasilia1:2007] isolate BR:BSB1, complete genome'
DNA-A	'NC_038956.1 Jatropha leaf yellow mosaic Katarniaghat virus isolate Katerniaghat 2 segment DNA-A, complete sequence'
DNA-A	'NC_024810.1 Coccinia mosaic Tamil Nadu virus isolate TN TDV Coc 1 segment DNA A, complete sequence'
DNA-A	'NC_024777.1 Small begomovirus-associated satellite isolate Sa19-S1, complete sequence'
DNA-A	'NC_025725.1 Jatropha leaf crumple virus isolate SKJ1, complete genome'
DNA-A	'NC_038976.1 Euphorbia yellow leaf curl virus isolate PK1A, complete genome'
DNA-A	'NC_026253.1 Oxalis yellow vein virus strain USA:LA:01 segment DNA-A, complete sequence'
DNA-A	'NC_038963.1 Tomato latent virus isolate T2+, complete genome'
DNA-A	'NC_026514.1 Asystasia mosaic Madagascar virus isolate MG493 segment DNA-A, complete sequence'
DNA-A	'NC_026761.1 Tomato enation leaf curl virus isolate TC14 segment DNA-A, complete sequence'
DNA-A	'NC_026763.1 Malvastrum yellow vein Cambodia virus isolate 08 segment DNA-A, complete sequence'
DNA-A	'NC_028046.1 Chilli leaf curl Ahmedabad virus-India [India/Ahmedabad/2014], complete genome'
DNA-A	'NC_038965.1 Tomato chlorotic mottle Guyane virus isolate GF:Mon2:GF455:09 segment DNA-A, complete sequence'
DNA-A	'NC_031764.1 Passionfruit leaf distortion virus isolate Colombia-Valle-2014 segment A, complete sequence'
DNA-A	'NC_028262.1 Andrographis yellow vein leaf curl virus isolate A-64, complete genome'
DNA-A	'NC_031466.1 Lisianthus enation leaf curl virus DNA, complete genome, isolate: BG-1'
DNA-A	'NC_043203.1 Ipomea begomovirus satellite 1 isolate PR3-2, complete sequence'
DNA-A	'NC_028140.1 Melochia mosaic virus DNA A, complete sequence'
DNA-A	'NC_028142.1 Melochia yellow mosaic virus DNA A, complete sequence'
DNA-A	'NC_029105.1 Pavonia yellow mosaic virus isolate BR-Alb51-14 segment DNA-A, complete sequence'
DNA-A	'NC_038982.1 Cnidoscolus mosaic leaf deformation virus isolate BR-Mes3-15 segment DNA-A, complete sequence'
DNA-A	'NC_038981.1 Pavonia mosaic virus isolate BR-Cor40-14 segment DNA-A, complete sequence'
DNA-A	'NC_028989.1 Pepper yellow leaf curl Thailand virus isolate KON-KG5 segment DNA-A, complete sequence'
DNA-A	'NC_038978.1 Lycianthes yellow mosaic virus isolate GD segment DNA-A, complete sequence'
DNA-A	'NC_029804.1 Deinbollia mosaic virus isolate DB_T1A segment DNA-A, complete sequence'
DNA-A	'NC_029995.1 Tomato yellow leaf curl Shuangbai virus - [Y4536], complete genome'
DNA-A	'NC_038983.1 Triumfetta yellow mosaic virus isolate BR-Msj1-10 segment DNA-A, complete sequence'
DNA-A	'NC_030699.1 Ramie mosaic Yunnan virus isolate 4819-5 segment DNA-A, complete sequence'
DNA-A	'NC_038985.1 Velvet bean golden mosaic virus isolate bgv6-5, complete genome'
DNA-A	'NC_030748.1 Senna leaf curl virus isolate Mohali, complete genome'
DNA-A	'NC_031306.1 Synedrella leaf curl virus isolate YN3306, complete genome'
DNA-A	'NC_031452.1 Macroptilium bright mosaic virus isolate ALM33_5B segment DNA-A, complete sequence'
DNA-A	'NC_031448.1 Macroptilium common mosaic virus isolate ALM2_5B segment DNA-A, complete sequence'
DNA-A	'NC_031456.1 Sida angular mosaic virus isolate ALS30_4C segment DNA-A, complete sequence'
DNA-A	'NC_031455.1 Sida chlorotic vein virus isolate ALS15_2C segment DNA-A, complete sequence'
DNA-A	'NC_031451.1 Wissadula yellow mosaic virus isolate ALW35_5B segment DNA-A, complete sequence'
DNA-A	'NC_031458.1 Malvastrum bright yellow mosaic virus isolate Ma8S clone Ma8S-5A segment DNA-A, complete sequence'
DNA-A	'NC_038994.1 Synedrella yellow vein clearing virus isolate NCBS-PS-1 segment DNA-A, complete sequence'
DNA-A	'NC_038988.1 Common bean mottle virus isolate CU/Mayabeque 6/2014 segment DNA-A, complete sequence'
DNA-A	'NC_031961.1 Common bean severe mosaic virus isolate Cuba/Mayabeque 16/2014 segment DNA-A, complete sequence'
DNA-A	'NC_032118.1 Vernonia crinkle virus isolate UG7, complete sequence'
DNA-A	'NC_033554.1 Pea leaf distortion virus clone N36-41 segment DNA-A, complete sequence'
DNA-A	'NC_038991.1 Sida bright yellow mosaic virus isolate BR:Tac720:10, complete sequence'
DNA-A	'NC_038990.1 Sida chlorotic mottle virus isolate BR:Trm531.1:10, complete sequence'
DNA-A	'NC_038992.1 Sida golden yellow spot virus isolate BR:Sab889:10, complete sequence'
DNA-A	'NC_033779.1 Tomato leaf curl Burkina Faso virus isolate Burkina Faso:Loumbila:Tomate51B1:2013, complete genome'
DNA-A	'NC_039001.1 Desmodium mottle virus isolate UG5 segment DNA-A, complete sequence'
DNA-A	'NC_043526.1 Jacquemontia yellow vein virus isolate 1915 clone 1 segment DNA-A, complete sequence'
DNA-A	'NC_043524.1 Bean leaf crumple virus isolate HA segment DNA-A, complete sequence'
DNA-A	'NC_035473.1 Emilia sonchifolia yellow vein Thailand virus isolate TH4872-6 segment DNA-A, complete sequence'
DNA-A	'NC_035487.1 Macroptilium golden yellow mosaic virus isolate DR:M45:16 segment DNA A, complete sequence'
DNA-A	'NC_035481.1 Tomato leaf curl purple vein virus isolate BR:793:15 clone P793, complete genome'
DNA-A	'NC_022586.1 Sweet potato leaf curl Sichuan virus 2 isolate China:Sichuan14:2012, complete genome'
DNA-A	'NC_038465.1 Sweet potato leaf curl Sichuan virus 1 isolate China:Sichuan15:2012, complete genome'
DNA-A	'NC_038471.1 Tomato leaf curl New Delhi virus 4 isolate TC306 segment DNA-A, complete sequence'
DNA-A	'NC_038470.1 Tomato leaf curl New Delhi virus 2, complete genome'
DNA-A	'NC_018090.1 French bean leaf curl virus isolate FbLCV-Kanpur segment DNA-A, complete sequence'
DNA-A	'NC_022005.1 Bean white chlorosis mosaic virus isolate Venezuela:Rubio 932:2007 segment DNA-A, complete sequence'
DNA-A	'NC_039082.1 Euphorbia mosaic virus Peru DNA-A, complete genome'
DNA-A	'NC_038962.1 Jatropha leaf curl Gujarat virus, complete genome'
DNA-A	'NC_043433.1 Sweet potato golden vein Korea virus isolate 102_SPGVaV, complete genome'
DNA-A	'NC_030403.1 Telfairia golden mosaic virus isolate Cameroon-Bakundu Bangang-Telfairia-20-14 segment DNA-A, complete sequence'
DNA-A	'NC_038967.1 VEM begomovirus 1 isolate GtSq11 segment DNA-A, complete sequence'
DNA-A	'NC_038968.1 VEM begomovirus 2 isolate GtSq5 segment DNA-A, complete sequence'
DNA-A	'NC_038969.1 VEM begomovirus 3 isolate GtSq10 segment DNA-A, complete sequence'
DNA-A	'NC_038970.1 VEM begomovirus 4 isolate GtSq8 segment DNA-A, complete sequence'
DNA-A	'NC_038971.1 VEM begomovirus 6 isolate PR10-1 segment DNA-A, complete sequence'
DNA-A	'NC_038972.1 VEM begomovirus 7 isolate Sp5-4, complete sequence'
DNA-A	'NC_039003.1 Malachra yellow mosaic virus DNA, segment DNA-A, complete sequence, isolate: Barasat'
DNA-B	'NC_015961.1 Tomato chlorotic leaf distortion virus-[Venezuela:Zulia:2004] DNA_B, complete genome'
DNA-B	'NC_016579.1 Sida mosaic Alagoas virus DNA-B, complete genome'
DNA-B	'NC_016577.1 Abutilon mosaic Brazil virus DNA-B, complete genome'
DNA-B	'NC_016576.1 Asystasia begomovirus 1 isolate ABgV1 segment DNA-B, complete sequence'
DNA-B	'NC_003860.1 Squash yellow mild mottle virus DNA B, complete sequence'
DNA-B	'NC_016083.1 Sida yellow mottle virus strain Cuba:Sancti Spiritus159-1:2009 segment DNA-B, complete sequence'
DNA-B	'NC_009491.1 Tomato mild yellow leaf curl Aragua virus DNA B, complete sequence'
DNA-B	'NC_017005.1 Cassava mosaic Madagascar virus DNA B, complete genome'
DNA-B	'NC_017002.1 Macroptilium yellow net virus DNA B, complete genome'
DNA-B	'NC_038234.1 Tomato rugose yellow leaf curl virus isolate U1 clone 3 segment DNA_B, complete sequence'
DNA-B	'NC_016581.1 Tomato dwarf leaf virus DNA-B, complete genome'
DNA-B	'NC_038797.1 Jacquemontia mosaic Yucatan virus segment DNA-B, complete sequence'
DNA-B	'NC_018456.1 Soybean chlorotic spot virus DNA-B, complete sequence'
DNA-B	'NC_019568.1 Bean chlorosis virus isolate Venezuela:La Barinesa 459:2006 segment DNA-B, complete sequence'
DNA-B	'NC_022003.1 Bean chlorotic mosaic virus isolate Venezuela:Rubio 932:2007 segment DNA-B, complete sequence'
DNA-B	'NC_018718.1 Dalechampia chlorotic mosaic virus isolate Venezuela:Albarico 1020:2007 segment DNA-B, complete sequence'
DNA-B	'NC_018715.1 Datura leaf distortion virus isolate Venezuela:Rubio 933:2007 segment DNA-B, complete sequence'
DNA-B	'NC_019036.1 Blechum interveinal chlorosis virus DNA B, complete genome'
DNA-B	'NC_025266.1 Tomato mottle wrinkle virus isolate Ar:Pichanal:400 segment DNA-B, complete sequence'
DNA-B	'NC_022008.1 Capraria yellow spot Yucatan virus segment DNA-B, complete sequence'
DNA-B	'NC_040180.1 Allamanda leaf mottle distortion virus isolate Al-K1 segment DNA-B, complete sequence'
DNA-B	'NC_038795.1 Cotton chlorotic spot virus isolate Brazil:CampinaGrandeB012:2009 segment DNA-B, complete sequence'
DNA-B	'NC_040181.1 Jacquemontia yellow mosaic virus isolate [Venezuela:Rio Cocollar 1250:2009] segment DNA-B, complete sequence'
DNA-B	'NC_024895.1 Bitter gourd yellow vein virus isolate BD12C8 segment DNA-B, complete sequence'
DNA-B	'NC_024809.1 Coccinia mosaic Tamil Nadu virus isolate TN TDV Coc 1 segment DNA B, complete sequence'
DNA-B	'NC_026513.1 Asystasia mosaic Madagascar virus isolate MG493 segment DNA-B, complete sequence'
DNA-B	'NC_040183.1 Tomato chlorotic mottle Guyane virus isolate GF:Mon2:GF455:09 segment DNA-B, complete sequence'
DNA-B	'NC_028141.1 Melochia mosaic virus DNA B, complete sequence'
DNA-B	'NC_028143.1 Melochia yellow mosaic virus DNA B, complete sequence'
DNA-B	'NC_037611.1 Pavonia yellow mosaic virus isolate BR-Alb51-14 segment DNA-B, complete sequence'
DNA-B	'NC_040184.1 Cnidoscolus mosaic leaf deformation virus isolate BR-Mes3-15 segment DNA-B, complete sequence'
DNA-B	'NC_040185.1 Pavonia mosaic virus isolate BR-Cor40-14 segment DNA-B, complete sequence'
DNA-B	'NC_040186.1 Pepper yellow leaf curl Thailand virus isolate WF-SPN-Pep2015 segment DNA-B, complete sequence'
DNA-B	'NC_040187.1 Lycianthes yellow mosaic virus isolate GD segment DNA-B, complete sequence'
DNA-B	'NC_029803.1 Deinbollia mosaic virus isolate DB_T1B segment DNA-B, complete sequence'
DNA-B	'NC_040188.1 Triumfetta yellow mosaic virus isolate BR-Msj1-10 segment DNA-B, complete sequence'
DNA-B	'NC_031453.1 Macroptilium common mosaic virus isolate BLM2_1S segment DNA-B, complete sequence'
DNA-B	'NC_031457.1 Sida angular mosaic virus isolate BLS30_2H segment DNA-B, complete sequence'
DNA-B	'NC_031454.1 Sida chlorotic vein virus isolate BLS15_2E segment DNA-B, complete sequence'
DNA-B	'NC_031459.1 Malvastrum bright yellow mosaic virus isolate Ma8S clone Ma8S-5B segment DNA-B, complete sequence'
DNA-B	'NC_040189.1 Common bean mottle virus isolate CU/Mayabeque 6/2014 segment DNA-B, complete sequence'
DNA-B	'NC_040190.1 Common bean severe mosaic virus isolate Cuba:Mayabeque 99:2014 segment DNA-B, complete sequence'
DNA-B	'NC_040192.1 Desmodium mottle virus isolate UG5 segment DNA-B, complete sequence'
DNA-B	'NC_035488.1 Macroptilium golden yellow mosaic virus isolate DR:M45:16 segment DNA B, complete sequence'
DNA-B	'NC_003887.1 Cabbage leaf curl virus nuclear shuttle movement protein (BV1) and movement/pathogenicity protein (BC1) genes, complete cds'
DNA-B	'NC_038790.1 Bean golden yellow mosaic virus-[Dominican Republic] BR1 protein (BR1) and BL1 protein (BL1) genes, complete cds'
DNA-B	'NC_038803.1 Rhynchosia golden mosaic Sinaloa virus segment B, complete sequence'
DNA-B	'NC_031765.1 Passionfruit leaf distortion virus isolate Colombia-Valle-2014 segment B, complete sequence'
DNA-B	'NC_040191.1 Sida bright yellow mosaic virus isolate BR:Tac720:10, complete sequence'
betasatellite	'NC_034250.1 Tomato leaf curl Pakistan betasatellite complete sequence, clone HZ4'
betasatellite	'NC_028130.1 Luffa begomovirus betasatellite isolate WOK73, complete sequence'
betasatellite	'NC_028128.1 Malachra yellow vein mosaic betasatellite isolate OK113, complete sequence'
betasatellite	'NC_032119.1 Vernonia crinkle betasatellite isolate UG7, complete sequence'
betasatellite	'NC_033618.1 Pea leaf distortion betasatellite clone N36-54, complete sequence'
betasatellite	'NC_005048.1 Chilli leaf curl disease associated sequence virion, complete genome'
betasatellite	'NC_043429.1 Ageratum yellow vein Sri Lanka betasatellite C1 gene, clone sl7-1'
betasatellite	'NC_038677.1 Eupatorium yellow vein mosaic betasatellite DNA, complete genome, isolate: Suya-2003'
betasatellite	'NC_038678.1 Okra leaf curl Oman betasatellite isolate OKB-1, complete sequence'
betasatellite	'NC_009450.1 Tobacco leaf curl Japan betasatellite DNA, complete genome'
betasatellite	'NC_038683.1 Tobacco leaf curl Patna betasatellite isolate Pusa-Bihar, complete sequence'
betasatellite	'NC_038925.1 Tomato leaf curl Laos betasatellite C1 gene, clone l171-1'
betasatellite	'NC_038926.1 Tomato leaf curl Nepal betasatellite C1 gene, clone nept4-12'
betasatellite	'NC_038924.1 Mirabilis leaf curl betasatellite complete sequence, isolate Himachal'
betasatellite	'NC_038686.1 Tomato leaf curl Malaysia betasatellite, complete sequence'
betasatellite	'NC_015928.1 Vernonia yellow vein Fujian virus betasatellite, complete genome'
betasatellite	'NC_040544.1 Tomato leaf curl Yunnan betasatellite strain China:Yunnan 2:Tomato:2015, complete sequence'
alphasatellite	'NC_014379.1 Melon chlorotic mosaic virus-associated alphasatellite, complete genome'
alphasatellite	'NC_038973.1 Whitefly associated Guatemala alphasatellite 2 isolate GtTo2-1, complete sequence'
alphasatellite	'NC_038975.1 Whitefly associated Puerto Rico alphasatellite 1 isolate PR3-6, complete sequence'
alphasatellite	'NC_038974.1 Whitefly associated Guetamala alphasatellite 1 isolate GtTo2-2, complete sequence'

## Sheet: Sheet3
'NC_002981.1 Ageratum yellow vein Sri Lanka virus segment A, complete genome'
'NC_003867.1 Tomato mosaic Havana virus-[Quivican] DNA, segment A'
'NC_004153.1 Tomato leaf curl Vietnam virus DNA A, complete genome'
'NC_004192.1 Pepper leaf curl Bangladesh virus segment A component, complete genome'
'NC_004650.1 Sweet potato leaf curl virus DNA A, complete sequence'
'NC_005319.1 Euphorbia leaf curl virus DNA A, complete sequence'
'NC_005843.1 Tomato chino La Paz virus segment A, complete genome'
'NC_005844.1 Papaya leaf curl Guandong virus - [GD2] DNA A, complete sequence'
'NC_007211.1 Alternanthera yellow vein virus DNA-A, complete genome'
'NC_007290.1 Cotton leaf curl Bangalore virus segment A, complete genome'
'NC_007339.1 Squash leaf curl China virus - [B] DNA-A, complete genome'
'NC_007210.2 Ludwigia yellow vein virus DNA-A, complete genome'
'NC_007723.1 Tomato leaf curl Joydebpur virus DNA-A, complete genome'
'NC_008304.1 Euphorbia mosaic virus - A [Mexico:Yucatan:2004] clone pEuMV-YP-A segment DNA-A, complete sequence'
'NC_008374.1 Tomato yellow leaf curl Guangdong virus DNA A, complete sequence'
'NC_008373.1 Tomato leaf curl Guangdong virus DNA-A, complete sequence'
'NC_008377.1 Okra yellow crinkle virus segment A, complete sequence'
'NC_008559.1 Malvastrum yellow mosaic virus DNA-A, complete genome'
'NC_009030.1 Tomato leaf curl Arusha virus DNA-A, complete sequence'
'NC_009088.1 Mesta yellow vein mosaic virus DNA-A, complete sequence'
'NC_009550.1 Lindernia anagallis yellow vein virus DNA-A, complete sequence'
'NC_009545.1 Spilanthes yellow vein virus DNA-A, complete sequence'
'NC_009546.1 Mimosa yellow leaf curl virus DNA-A, complete sequence'
'NC_009547.1 Sida yellow vein Vietnam virus DNA-A, complete sequence'
'NC_009548.1 Tomato yellow leaf curl Vietnam virus DNA-A, complete sequence'
'NC_009549.1 Erectites yellow mosaic virus DNA-A, complete sequence'
'NC_010238.1 Radish leaf curl virus segment A, complete sequence'
'NC_010313.1 Tomato leaf curl Ghana virus segment A, complete genome'
'NC_010435.1 Kenaf leaf curl virus DNA A, complete sequence'
'NC_010439.1 Tomato leaf curl Cebu virus DNA-A, complete genome'
'NC_010440.1 Tomato leaf curl Mindanao virus DNA-A, complete genome'
'NC_010812.1 Ageratum yellow vein Hualian virus-[Taiwan:Hsinchu:tom:2003] DNA A, complete sequence'
'NC_010818.1 Mesta yellow vein mosaic Bahraich virus-[India:Bahraich:2007] DNA A, complete sequence'
'NC_010946.1 Pumpkin yellow mosaic Malaysia virus DNA A, complete sequence'
'NC_010947.1 Allamanda leaf curl virus DNA-A, complete genome'
'NC_011096.1 Tomato leaf curl Kumasi virus segment A, complete sequence'
'NC_011804.1 Gossypium darwinii symptomless virus DNA-A, complete genome'
'NC_012041.1 Bhendi yellow vein Bhubhaneswar virus DNA-A, complete genome'
'NC_012492.1 Tomato leaf curl Patna virus DNA-A, complete genome'
'NC_012665.1 Malvastrum yellow vein Baoshan virus DNA-A, complete genome'
'NC_013019.1 Sunn hemp leaf distortion virus DNA-A, complete genome'
'NC_013413.1 Tomato leaf curl Sulawesi virus DNA-A, complete genome'
'NC_007730.2 Vernonia yellow vein virus DNA-A, complete genome'
'NC_014510.2 Tomato leaf deformation virus DNA-A, complete genome'
'NC_014596.1 Tobacco leaf curl Pusa virus DNA-A, complete genome'
'NC_014707.1 Papaya leaf crumple virus-Panipat 8 [India:Panipat:Papaya:2008] DNA-A, complete genome'
'NC_014845.1 Bhendi yellow vein India virus [India:Dharwad OYDWR2:2006] DNA-A, complete genome'
'NC_014894.1 Okra enation leaf curl virus [India:Munthal EL37:2006] DNA-A, complete genome'
'NC_015397.1 Cleome golden mosaic virus DNA-A, complete genome'
'NC_015487.1 Bean yellow mosaic Mexico virus DNA-A, complete genome'
'NC_016984.1 Pepper leaf curl Lahore Virus-[Pakistan:Lahore1:2004] segment A, complete genome'
'NC_016998.1 Centrosema yellow spot virus DNA-A, complete genome'
'NC_016999.1 Macroptilium yellow spot virus DNA A, complete sequence'
'NC_017000.1 Macroptilium yellow vein virus DNA-A, complete genome'
'NC_018090.1 French bean leaf curl virus isolate FbLCV-Kanpur segment DNA-A, complete sequence'
'NC_019034.1 Jatropha mosaic Nigerian virus isolate 2 segment DNA-A, complete sequence'
'NC_020253.1 Sida yellow net virus isolate BR:Vic2:10 segment DNA-A, complete sequence'
'NC_020254.1 Sida yellow blotch virus isolate BR:Rla1:10 segment DNA-A, complete sequence'
'NC_020255.1 Sida yellow mosaic Alagoas virus isolate BR:Vsa3:10 segment DNA-A, complete sequence'
'NC_020256.1 Sida mottle Alagoas virus isolate BR:Vsa2:10 segment DNA-A, complete sequence'
'NC_021245.1 Malvastrum leaf curl Philippines virus isolate Mc1 segment DNA-A, complete sequence'
'NC_021341.1 Tomato yellow leaf curl Yunnan virus isolate YN2013 clone 10 segment DNA-A, complete sequence'
'NC_021579.1 Tomato golden leaf spot virus isolate TO83 Araguaina segment DNA-A, complete sequence'
'NC_022005.1 Bean white chlorosis mosaic virus isolate Venezuela:Rubio 932:2007 segment DNA-A, complete sequence'
'NC_022073.1 Hemidesmus yellow mosaic virus clone H1 segment DNA-A, complete sequence'
'NC_023849.1 Pouzolzia golden mosaic virus isolate TY01 segment DNA-A, complete sequence'
'NC_026253.1 Oxalis yellow vein virus strain USA:LA:01 segment DNA-A, complete sequence'
'NC_026761.1 Tomato enation leaf curl virus isolate TC14 segment DNA-A, complete sequence'
'NC_026763.1 Malvastrum yellow vein Cambodia virus isolate 08 segment DNA-A, complete sequence'
'NC_030403.1 Telfairia golden mosaic virus isolate Cameroon-Bakundu Bangang-Telfairia-20-14 segment DNA-A, complete sequence'
'NC_030699.1 Ramie mosaic Yunnan virus isolate 4819-5 segment DNA-A, complete sequence'
'NC_030749.1 Malvastrum yellow vein Honghe virus segment DNA-A, complete sequence, isolate Y249'
'NC_031451.1 Wissadula yellow mosaic virus isolate ALW35_5B segment DNA-A, complete sequence'
'NC_031452.1 Macroptilium bright mosaic virus isolate ALM33_5B segment DNA-A, complete sequence'
'NC_031754.1 Okra enation leaf curl virus isolate Trincomalee segment DNA-A, complete sequence'
'NC_032006.1 Tomato mottle leaf curl virus isolate BR-PB44-14 segment DNA-A, complete sequence'
'NC_033554.1 Pea leaf distortion virus clone N36-41 segment DNA-A, complete sequence'
'NC_011309.2 Jatropha yellow mosaic virus segment DNA-A, complete sequence'
'NC_038438.1 Abutilon golden mosaic Yucatan virus isolate Conkal-2007 segment A, complete sequence'
'NC_038439.1 Boerhavia yellow spot virus isolate Yucatan segment DNA A, complete sequence'
'NC_038441.1 Chilli leaf curl Kanpur virus [India/Kanpur/2008] clone pChKanB19 segment DNA-A, complete sequence'
'NC_038442.1 Chilli Leaf curl Vellanad virus [India/Vellanad/2008] clone pChVelK52 segment DNA-A, complete sequence'
'NC_038443.1 Chino del tomate Amazonas virus isolate AM10 segment DNA-A, complete sequence'
'NC_038444.1 Cotton leaf curl Gezira virus-[Cotton] A component, complete genome'
'NC_038445.1 Cowpea golden mosaic virus-[Nigeria] DNA-A, complete sequence'
'NC_038448.1 Hedyotis uncinella yellow mosaic virus isolate VN1 segment DNA-A, complete sequence'
'NC_038449.1 Jatropha mosaic India virus-[Lucknow] strain SK-2 segment DNA-A, complete sequence'
'NC_038450.1 Leonurus mosaic virus isolate PR 88 segment DNA-A, complete sequence'
'NC_038451.1 Ludwigia yellow vein Vietnam virus segment DNA-A, complete sequence'
'NC_038452.1 Malvastrum yellow mosaic Helshire virus isolate Ma179A5 segment DNA-A, complete sequence'
'NC_038453.1 Pouzolzia mosaic Guangdong virus isolate GD1 segment DNA-A, complete sequence'
'NC_038454.1 Premna leaf curl virus isolate VN7 segment DNA-A, complete sequence'
'NC_038455.1 Sauropus leaf curl virus isolate AFSP5e segment A, complete sequence'
'NC_038456.1 Sida ciliaris golden mosaic virus strain Venezuela:Lara:M3:2009 segment DNA-A, complete sequence'
'NC_038457.1 Sida common mosaic virus isolate BR:Coi4:07 segment DNA-A, complete sequence'
'NC_038459.1 Sida golden mosaic Lara virus strain Venezuela:Lara:M1:2009 segment DNA-A, complete sequence'
'NC_038461.1 Sida yellow leaf curl virus isolate BR:Coi3:07 segment DNA-A, complete sequence'
'NC_038462.1 Sidastrum golden leaf spot virus isolate DF334 segment DNA-A, complete sequence'
'NC_038463.1 Soybean blistering mosaic virus isolate NOA segment DNA-A, complete sequence'
'NC_038464.1 Sweet potato leaf curl China virus segment A, complete sequence'
'NC_038467.1 Tomato bright yellow mosaic virus isolate BA167 segment DNA-A, complete sequence'
'NC_038468.1 Tomato bright yellow mottle virus isolate TO167 segment DNA-A, complete sequence'
'NC_038469.1 Tomato interveinal chlorosis virus isolate PE[BR:Mdc2681:04] segment DNA-A, complete sequence'
'NC_038471.1 Tomato leaf curl New Delhi virus 4 isolate TC306 segment DNA-A, complete sequence'
'NC_038472.1 Tomato leaf curl Rajasthan virus - [India:Rajasthan:2005] segment A, complete sequence'
'NC_038473.1 Tomato leaf curl Uganda virus - [Iganga] segment A, complete sequence'
'NC_038474.1 Tomato leaf distortion virus isolate BR:Pda4:05 segment DNA-A, complete sequence'
'NC_038475.1 Vigna yellow mosaic virus isolate Yautepec-2007 segment A, complete sequence'
'NC_038476.1 Asystasia begomovirus 2 segment DNA-A, complete sequence'
'NC_038875.1 Chilli leaf curl India virus segment A, complete genome'
'NC_038876.1 Clerodendrum golden mosaic Jiangsu virus complete DNA-A genome, isolate YX2'
'NC_038890.1 Tobacco leaf rugose virus DNA-A, complete sequence'
'NC_038967.1 VEM begomovirus 1 isolate GtSq11 segment DNA-A, complete sequence'
'NC_038968.1 VEM begomovirus 2 isolate GtSq5 segment DNA-A, complete sequence'
'NC_038969.1 VEM begomovirus 3 isolate GtSq10 segment DNA-A, complete sequence'
'NC_038970.1 VEM begomovirus 4 isolate GtSq8 segment DNA-A, complete sequence'
'NC_038971.1 VEM begomovirus 6 isolate PR10-1 segment DNA-A, complete sequence'
'NC_038980.1 Duranta leaf curl virus isolate 57SA segment DNA-A, complete sequence'
'NC_038994.1 Synedrella yellow vein clearing virus isolate NCBS-PS-1 segment DNA-A, complete sequence'
'NC_039082.1 Euphorbia mosaic virus Peru DNA-A, complete genome'
